# Supplementary material for: Effect of milk protein content in Toddler formula on later BMI and obesity risk: protocol of the multicentre randomised controlled Toddler Milk Intervention (ToMI) trial
Source: PubMed Central journal article supplement — BMJ Open. 2021 Dec 6;11(12):e048290. doi: 10.1136/bmjopen-2020-048290 (PMC8655563; doi:10.1136/bmjopen-2020-048290), 2021-12-06
Supplement: bmjopen-2020-048290.draft_revisions.pdf [file bmjopen-2020-048290.draft_revisions.pdf]

# BMJ Open

BMJ Open is committed to open peer review. As part of this commitment we make the peer review history of every article we publish publicly available.

When an article is published we post the peer reviewers' comments and the authors' responses online. We also post the versions of the paper that were used during peer review. These are the versions that the peer review comments apply to.

The versions of the paper that follow are the versions that were submitted during the peer review process. They are not the versions of record or the final published versions. They should not be cited or distributed as the published version of this manuscript.

BMJ Open is an open access journal and the full, final, typeset and author-corrected version of record of the manuscript is available on our site with no access controls, subscription charges or pay-per-view fees (<http://bmjopen.bmj.com>).

If you have any questions on BMJ Open's open peer review process please email [info.bmjopen@bmj.com](mailto:info.bmjopen@bmj.com)

# BMJ Open

## Multicentre randomized controlled trial of protein content in toddler formula during the second year of life: Protocol of the ToMI trial

|                               |                                                                                                                                                                                                                                                                                                                                                                                                                                                                                                                                                   |
|-------------------------------|---------------------------------------------------------------------------------------------------------------------------------------------------------------------------------------------------------------------------------------------------------------------------------------------------------------------------------------------------------------------------------------------------------------------------------------------------------------------------------------------------------------------------------------------------|
| Journal:                      | <i>BMJ Open</i>                                                                                                                                                                                                                                                                                                                                                                                                                                                                                                                                   |
| Manuscript ID                 | bmjopen-2020-048290                                                                                                                                                                                                                                                                                                                                                                                                                                                                                                                               |
| Article Type:                 | Protocol                                                                                                                                                                                                                                                                                                                                                                                                                                                                                                                                          |
| Date Submitted by the Author: | 23-Dec-2020                                                                                                                                                                                                                                                                                                                                                                                                                                                                                                                                       |
| Complete List of Authors:     | Grote, Veit; University Hospital Munich, Dr. von Hauner Children's Hospital<br>Jaeger, Vanessa; University Hospital Munich, Dr. von Hauner Children's Hospital<br>Escribano, Joaquin; Universitat Rovira i Virgili; Hospital Universitari Sant Joan de Reus<br>Zaragoza, Marta; Universitat Rovira i Virgili; Hospital Universitari de Tarragona Joan XXIII<br>Gispert, Mariona; Universitat Rovira i Virgili<br>Grathwohl, Dominik; Nestle Research Center<br>Koletzko, Berthold; University Hospital Munich, Dr. von Hauner Children's Hospital |
| Keywords:                     | NUTRITION & DIETETICS, PAEDIATRICS, Other metabolic, e.g. iron, porphyria < DIABETES & ENDOCRINOLOGY                                                                                                                                                                                                                                                                                                                                                                                                                                              |
|                               |                                                                                                                                                                                                                                                                                                                                                                                                                                                                                                                                                   |

SCHOLARONE™  
Manuscripts

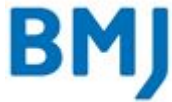

I, the Submitting Author has the right to grant and does grant on behalf of all authors of the Work (as defined in the below author licence), an exclusive licence and/or a non-exclusive licence for contributions from authors who are: i) UK Crown employees; ii) where BMJ has agreed a CC-BY licence shall apply, and/or iii) in accordance with the terms applicable for US Federal Government officers or employees acting as part of their official duties; on a worldwide, perpetual, irrevocable, royalty-free basis to BMJ Publishing Group Ltd ("BMJ") its licensees and where the relevant Journal is co-owned by BMJ to the co-owners of the Journal, to publish the Work in this journal and any other BMJ products and to exploit all rights, as set out in our [licence](#).

The Submitting Author accepts and understands that any supply made under these terms is made by BMJ to the Submitting Author unless you are acting as an employee on behalf of your employer or a postgraduate student of an affiliated institution which is paying any applicable article publishing charge ("APC") for Open Access articles. Where the Submitting Author wishes to make the Work available on an Open Access basis (and intends to pay the relevant APC), the terms of reuse of such Open Access shall be governed by a Creative Commons licence – details of these licences and which [Creative Commons](#) licence will apply to this Work are set out in our licence referred to above.

Other than as permitted in any relevant BMJ Author's Self Archiving Policies, I confirm this Work has not been accepted for publication elsewhere, is not being considered for publication elsewhere and does not duplicate material already published. I confirm all authors consent to publication of this Work and authorise the granting of this licence.

1  
2 **Multicentre randomized controlled trial of protein content in toddler formula during the second year of life:**

3 **Protocol of the ToMI trial**

4  
5  
6 Veit Grote<sup>1</sup>, Vanessa Jäger<sup>1</sup>, Joaquin Escribano<sup>2,3</sup>, Marta Zaragoza-Jordana<sup>2,4</sup>, Mariona Gispert-  
7 Llaurodo<sup>2</sup>, Dominik Grathwohl<sup>5</sup>, Berthold Koletzko<sup>1</sup>  
8  
9

10  
11  
12 <sup>1</sup>Div. Metabolic and Nutritional Medicine, Dept. of Paediatrics, Dr. von Hauner Children's Hospital,  
13 University Hospital, LMU – Ludwig-Maximilians-Universität Munich, Germany  
14

15  
16 <sup>2</sup>Universitat Rovira i Virgili, IISPV, Pediatric Nutrition and Human Development Research Unit, Spain  
17

18 <sup>3</sup>Hospital Universitari Sant Joan de Reus, Spain  
19

20 <sup>4</sup>Hospital Universitari de Tarragona Joan XXIII, Spain  
21

22 <sup>5</sup>Nestlé Research, Lausanne, Switzerland  
23  
24  
25  
26  
27  
28

29 Corresponding author:

30  
31 Prof. Dr. med. Berthold Koletzko, Dr. von Hauner Children's Hospital, Lindwurmstr. 4, 80337 Munich,  
32 Germany. Email: Berthold.Koletzko@med.uni-muenchen.de  
33  
34  
35  
36  
37  
38  
39  
40  
41  
42  
43  
44  
45  
46  
47  
48  
49  
50  
51  
52  
53  
54  
55  
56  
57  
58  
59  
60

## Abstract

**Introduction** Reduction of milk protein content in infant formula provided during the first year of life has been shown to reduce early weight gain and obesity later in life. While rapid weight gain during the first two years of life is one of the strongest early predictors of obesity, the role of animal protein intake beyond the first year of life is unclear. The aim of this study is to examine the role of milk protein during the second year of life in healthy children on weight gain and obesity risk in preschool age.

**Methods and analysis** This randomized, double-blinded study enrolled 1,618 children aged 11.5 to 13.5 months in Spain and Germany into 2 groups receiving isocaloric toddler milk with differing protein content during the second year of life. The experimental formula contains 1.5g/100kcal and the control formula 6.15g/100kcal protein and otherwise equal formula composition, except for modified fat content to achieve equal energy density. The primary endpoint is BMI-for-age z-score at the age of 24 months. The children are followed until 6 years of age.

**Ethics and dissemination** Ethics approval was obtained from the ethical committees of the LMU University Hospital Munich, Germany (Nr. 555-15) and at Institut d'Investigació Sanitaria Pere Virgili, Reus, Spain (Ref. CEIm IISPV 013/2016). We aim at publishing results in peer-reviewed journals and sharing of results with study participants.

**Trial registration number** NCT02907502

### Strengths and limitations of this study

- This study uses a randomized and double blinded design to minimize potential confounding and biases.
- The multicentre design of this study with sites in Spain and Germany increases external validity of study results.
- The follow-up of the cohort is planned until six years of age and will provide the possibility to examine long-term effects of the intervention.
- Conclusions will be limited to effects of dairy protein provided with milk based drinks in the second year of life and cannot be extrapolated to effects of total dietary protein supply.

### Keywords

Toddler milk; milk protein; protein intake; clinical trial; obesity; BMI

## Introduction

A randomized double blind controlled clinical trial demonstrated that reducing protein intake in infant formula provided in the first year of life lowers early weight gain until 2 years of age<sup>1</sup>. Data from the same study (CHildhood Obesity Project [CHOP] trial) demonstrated that lower protein supply with formula fed in the first year of life also reduced BMI and obesity risk at school age<sup>2</sup>. The results of the CHOP trial contributed to enhanced promotion of breastfeeding and efforts in reducing the protein content in infant and follow-on formula<sup>5 6</sup>.

It remains unclear which child age period is most sensitive to a modified protein intake, and whether limiting protein intake during the second year of life would also achieve benefits for prevention of excessive weight gain and later obesity. Observational studies find a consistent association of later overweight and obesity with total protein intake and in particular of milk protein intake, not only during infancy but also during the preschool age<sup>7-11</sup>. A systematic review on the effects of dietary protein intake concluded that the first 2 years of life are the most sensitive time period<sup>12</sup>.

The untoward programming effect of a high early protein intake on later obesity risk has been linked to its effects on increasing plasma and tissue concentrations of insulinogenic amino acids, insulin and insulin-like growth factor 1 (IGF-1), which appear to induce a higher weight gain during the first 2 years of life as well as an enhanced adipogenic activity<sup>13</sup>. Such effects of an infant formula higher protein content on insulinogenic amino acids, insulin and IGF-1 levels have been shown in the double-blind randomized CHOP trial<sup>15-17</sup>.

Milk protein seems to play a key role in growth regulation during early childhood. Protein intake is the main contributor for nutritional regulation of the IGF-I axis<sup>19 20</sup>. Milk protein enhances serum IGF-1 to a greater extent than meat protein<sup>21</sup>. This might explain the more pronounced effect of milk protein compared to other proteins on the later risk of obesity that has been reported<sup>10</sup>.

Average protein intake of young children in Europe and other regions is much higher than metabolic requirements. During the second year of life, 30-50% of total daily protein is comprised of dairy products<sup>25 26</sup>, indicating particular opportunities to reduce overall protein consumption through modifying dairy protein intake.

Therefore, we designed a randomized controlled trial to examine the role of milk protein intake during the second year of life on child growth and later obesity risk. If a reduction of milk protein during the second year of life has an appreciable effect on growth and obesity development, respective dietary modification may be translated into the practice of toddler feeding.

## Main Objective

We aim at evaluating the effect of two iso-energetic milk products for young children with differing protein content on growth during the second year of life.

## Methods and analysis

### Study design and population

The Toddler Milk Intervention trial (ToMI trial) is designed as a two-arm, parallel, randomized, double blind controlled trial to evaluate toddler milk products with different protein content. The study is conducted at university hospitals in Munich, Germany, and in Tarragona and Reus, Spain.

The target population are healthy children at the age of one year. The children are enrolled if they meet the inclusion and exclusion criteria outlined in Table1.

### Intervention

#### Formula composition

Two investigational formulas are used. The experimental formula contains 0.72g protein/100ml (1.5g/100 kcal), with a protein content that is similar to breast milk in advanced lactation. The control formula contains 2.95g protein/100ml (6.15g/100 kcal) which is comparable to standard cows' milk. Contents of energy, carbohydrates, vitamins and minerals are very similar for both formulas (Table 2). In order to reach the same energy content in both formulas, the fat content varies between experimental (4.25g fat/100 kcal) and control formula (2.16g fat/100 kcal) but the lipid composition and the ratio of milk fat/vegetable oils is the same.

#### Dose, route of administration and schedule of formula

Participating families receive the formula as milk powder (one can comprises about 400g of product) and are advised to prepare the formula according to the instructions. It is recommended to consume at least 300ml of formula per day. Further, parents are encouraged to substitute with the study formula any milk intake from the child's diet. The intake of other dairy products such as cheese or yoghurt is accepted.

The intervention starts with the first study visit at around one year of age and ends with the third study visit at around two years of age. The study formula is given to the parents at no costs and is delivered directly to subject's home. Subject's compliance is regularly checked by telephone and personal interviews. After the end of the intervention, return and pick-up of remaining cans is organized. If not possible, families are advised to destroy remaining infant formula cans.

## Discontinuation criteria

Discontinuation of the trial can be either due to withdrawal of consent at any time or due to the investigator's decision that continuation within the trial might impair child's health.

## Outcome measurements

### Primary endpoint

The primary endpoint is BMI-for-age z-score (based on the WHO Multicentre Growth Reference Study<sup>27</sup>) at the age of 24 months.

### Secondary objectives and endpoints

The secondary objectives serve to evaluate the safety and efficacy of the two milk products used and to complement the primary endpoint. Secondary endpoints are:

- BMI-for-age z-score at 72 months,
- The percentage of overweight and obese children at 24 months of age according to CDC definition: Overweight is at and above the 85th to less than 95th percentile and obese 95th percentile or greater,
- The percentage of overweight and obese children at 72 months of age,
- Anthropometric measures (z-scores for weight, length and head, waist and arm circumference at 12, 18, 24, 48 and 72 months of age; hip circumference at 48 and 72 month of age),
- Subcutaneous fat distribution (from skinfold thickness at 12, 18, 24, 48 and 72 months of age),
- Total body fat and lean mass (from BodPod measurements at 24, 48 and 72 month of age),
- Blood pressure (48 and 72 month of age),
- Child development (24 and 48 months of age),
- Metabolic and endocrine markers (IGF-1, IGF-BP2, IGF-BP3, insulin, leptin, adiponectin, ghrelin, lipid profile and complete blood count at 12, 24 and 72 month of age),
- Serum albumin, urea, creatinine, amino acids at 12, 24, 72 months of age and ferritin and 25-OH-vitamin D (at 24 months of age),
- Metabolic profile (from plasma at 12, 24 and 72 months of age and from urine samples at 12, 18, 24, 48 and 72 months of age),
- Urine markers (Calcium, C-peptide, creatinine urea nitrogen at 12, 18, 24, 48 and 72 months of age),

Furthermore, the following hypotheses will be examined:

- Total energy intake is not affected by the low protein formula.
- Total protein intake is lower in the group of protein reduced formula.



- Plasma concentrations of essential amino acids and of IGF-1 at the age of 24 months are lower in the low protein formula group compared to the high protein formula group.
- Systolic and diastolic blood pressure measurements at the ages of 48 and 72 months are lower in the low protein formula group compared to the high protein formula group.
- Body fat mass at age 24 months is lower in the low protein formula group compared to the high protein formula group.
- DNA methylation affects the association of protein intake and BMI
- Protein intake affects DNA methylation
- DNA methylation affects the association of protein intake and the metabolic profile

### Sample size

The sample size calculation is based on the observations from the CHOP-study<sup>1</sup>. This trial examined the difference in BMI-for-age z-scores between two groups of children fed a higher or lower formula during the first year of life. At 24 months of age the BMI for age z-score difference between both formula groups was 0.2. The absolute difference in protein content between intervention and control group in the CHOP-trial was lower (Infant formula: 0.8g/100ml; Follow-on formula: 1.6g/100ml) compared to the ToMI-trial (2.2g/100ml). Despite a higher protein difference, we expect a lower effect of the intervention due to the lower contribution of milk to the total protein intake in the second year of life. Thus, we assume a slightly lower mean difference in BMI for age z-score of 0.15 at 24 months of life.

The sample size was calculated with the BMI for age z-score of 0.15 and a standard deviation (sd) of 0.9. Assuming a power of 80 % and a significance level of 5% (two-sided alpha of 0.05), a sample size of 566 subjects per intervention arm is calculated. Therefore, 1,132 subjects in total are needed. To have enough power to detect also a difference at 72 months (6 years) of age, at an assumed loss to follow-up of 30%, a final sample size of 1,618 subjects was estimated.

### Recruitment

The study sites in Munich, Reus and Tarragona followed somewhat different recruitment strategies due to different local conditions. In Germany all inhabitants are registered in central registries. The public registries provided the study team for this defined research on a regular basis addresses of all families with children in the required age group (about 26,000 per year). These families living in Munich and about 70 surrounding municipalities were contacted once by postal mail and invited to contact the study team if interested in participation in the trial.

In Spain two recruitment strategies were used for both sites covering about 3000 births per year. First, telephone contacts from families who delivered their child at either of the two hospitals were available. These families were contacted directly. Second, recruitment interviews at primary health

1  
2 care centers were conducted. In these primary health care centers, Spanish children are seen for health  
3 care examinations and for vaccinations.  
4

#### 5 6 Allocation of study formula and blinding 7

8 The study formula cans are labelled with one of eight codes. Four codes each are assigned to the  
9 intervention or the control group, respectively. The allocation of the codes is performed online by  
10 study staff after check of in- and exclusion criteria within the data capture tool (iMedidata, Medidata  
11 Balance, New York, USA) using balanced randomization stratified by country. After enrolment of the  
12 subject into the trial, study staff dispense the assigned study formula to the study participant along  
13 with instructions for formula preparation.  
14  
15  
16  
17

18 The study is double blinded with all persons involved in local organization and conduct of the study  
19 such as study staff, principal investigator, project manager, biostatistician, data manager, trial monitor  
20 and laboratory analysts being unaware of the code allocation. After the code break for the primary  
21 outcome analysis, subjects will receive a new identification id in the analysis data to hamper the  
22 unblinding for above persons in the further follow-up. An emergency code break by an Investigator  
23 may be requested only in case of an unexpected serious adverse event (SAE) suspected to be related  
24 to the investigational product.  
25  
26  
27  
28  
29

#### 30 31 Data collection, management and analysis 32

##### 33 Data collection and management 34

35 During the intervention period three visits at the hospital are scheduled at 12, 18 and 24 months of  
36 age (Figure 1). At baseline socioeconomic data and data on health, growth and nutrition during the  
37 first year of life are assessed. At each visit anthropometric measurements are performed, urine  
38 samples and dietary intake records are collected. Blood is taken at 12 and 24 months of age.  
39 Additionally, at 24 months of age body composition using an air displacement plethysmography  
40 (BodPod COSMED, Rome, Italy) as well as physical activity measurement using an accelerometer device  
41 (Actigraph wGT3X-BT, Pensacola, FL, USA) is performed. Further, data of child's development based  
42 on parent answers of the Ages & Stages questionnaire (ASQ-3, Brookes Publishing Co., Inc., USA) are  
43 collected.  
44  
45  
46  
47  
48  
49

50 For follow-up, two additional visits are scheduled at 48 and 72 months of age with anthropometric,  
51 body composition and physical activity measurements and collection of urine samples and food  
52 frequency questionnaires. At 48 months of age, the ASQ-3 is used again. Blood is taken at 72 months  
53 of age.  
54  
55  
56

57 During all study visits and at several additional telephone calls between visits, parents are asked for  
58 health problems (including adverse events) and compliance. For compliance the intake of study milk  
59  
60

1  
2 and any discontinuation of study milk intake with reasons are determined. The number of consumed  
3 cans will be used to determine the average study milk consumption.  
4

5  
6 Collected data is organized in different databases. To organize and document all contacts with study  
7 participants and to coordinate the shipment of the study product, a web-based participant  
8 management tool is used (developed jointly with MedSciNet AB, Stockholm, Sweden). In this database,  
9 personal data is saved and stored on a secured data server. This database is separated from the other  
10 databases which store all medical, nutritional and laboratory data.  
11  
12  
13

14  
15 All collected health data are primarily captured on paper except data from questionnaires on physical  
16 activity and food frequency questionnaires based on the Idefics study that are partly entered by  
17 families using LimeSurvey (LimeSurvey GmbH, Hamburg, Germany). All other health data is entered  
18 into a further web-based database (iMedidata, New York, USA). Nutritional data from 24-hours recalls  
19 are entered into Nutritics (NUTRITICS LTD, Dublin, Ireland) with nutritional information from the  
20 German nutritional database BLS 3.02 and complemented with the nutritional composition from a  
21 variety of commercial infant foods and local foods, obtained directly from the label, producer websites  
22 or local food composition databases.  
23  
24  
25  
26  
27

28  
29 Laboratory samples are processed according to a laboratory SOP. In general, aliquots have 2D  
30 barcodes, are scanned, linked with the subject ID and stored into 96-well racks at -80°C for later  
31 analysis. Only blood count, lipid status and HbA1c are measured locally on the day of blood sampling.  
32  
33

34  
35 To ensure data quality, study staff is trained in regular intervals, and procedures are harmonized  
36 among study centers by regular contact and monitoring. Furthermore, anthropometric measurements  
37 are performed at least twice and data entry is strictly checked for consistency and plausibility by the  
38 monitor. Standard operating procedures for all measurements are in place; anthropometric  
39 measurements are based on the WHO Growth Standards study<sup>27</sup>.  
40  
41  
42

#### 43 Statistical methods

44  
45 A statistical analysis plan is created before final code break for the analysis of primary and secondary  
46 outcomes. For the statistical analysis, the full analysis dataset (FAS) and the per-protocol-dataset (PP)  
47 will be considered. The FAS comprises all randomized subjects who consumed at least one can of  
48 investigational product. The PP comprises all subjects included in the FAS with a mean consumption  
49 of the recommended daily minimum amount of investigational product (300ml/d). No imputation of  
50 missing values is foreseen.  
51  
52  
53  
54

55  
56 The primary endpoint will be analyzed by linear regression (ANCOVA) and corrected for BMI-for-age z-  
57 score at baseline, study center and gender. The results of the final model will be compared to further  
58 adjusted models; possible effect modification of the primary outcome will be also considered.  
59  
60

1  
2 Secondary analyses supporting primary objective:  
3

- 4 1. BMI-for-age z-score at 72 months.
- 5
- 6 2. The percentage of overweight and obese children at 24 months of age according to CDC  
7 definition: Overweight at and above the 85th to less than 95th percentile and obese 95th  
8 percentile or greater.
- 9
- 10
- 11 3. The percentage of overweight and obese children at 72 months of age.
- 12
- 13

14 In order to control the experiment wise false positive rate, the listed hierarchy (primary – secondary  
15 endpoints) will be maintained in interpreting these outcomes. The incidence of overweight and obese  
16 children at 24 and 72 months of age shall be also estimated according to International Obesity Task  
17 Force IOTF definition <sup>30</sup>. The percentage of overweight and obese children will be analyzed by the  
18 method of O. Sauzet, et al. <sup>31</sup>.

19  
20  
21  
22  
23 Secondary endpoints include anthropometric measures, dietary and biochemical data. We will use z-  
24 scores of WHO growth standards for anthropometry measures at months 12, 18, 24, and 48. We will  
25 use a likelihood-ratio test to examine if there is a longitudinal treatment effect. Additionally, treatment  
26 differences at each visit will be analyzed using ANCOVA. The ANCOVA approach was chosen so that  
27 treatment differences and p-value do not depend on the stage of analysis. A further supportive analysis  
28 with a mixed linear model shall be performed at stage 3. Fixed effects shall be the intervention group,  
29 age, gender, and age times intervention group. The random effects shall be a random intercept and  
30 slope.

31  
32  
33 Dietary data is collected by 24-hours recalls or food frequency questionnaires, which allow us to test  
34 for differences in macronutrient intake using ANCOVA. Hence, we are able to analyze if subjects change  
35 their dietary habits over time.

36  
37  
38 Biochemical data is often log-normal distributed. In order to analyze this kind of data properly, we will  
39 log-transform the data to achieve approximately normal distributed residuals.

## 40 41 42 43 44 45 46 Monitoring

### 47 48 Data monitoring

49  
50 To ensure safety of the intervention, an interim analysis is planned when 260 subjects have completed  
51 the intervention (at 24 months of age). Non-inferiority for growth has to be shown. If this is the case,  
52 the study is continued as planned. Otherwise, a second stage interim analysis is performed including  
53 the first 390 subjects who have completed the intervention. Non-inferiority is shown when in FAS as  
54 well as in PP the lower bound of the two-sided 95% confidence interval of the treatment difference  
55 (estimated model) is larger than the non-inferiority margin. Furthermore, the safety evaluation will  
56  
57  
58  
59  
60

1  
2 consider endpoints including adverse events, anthropometry, laboratory data and protein intake.  
3  
4 Based on the results of the interim analysis and in accordance with the charter of the Data Monitoring  
5  
6 Committee, the DMC will recommend either continuing the study as planned or performing the second  
7  
8 stage interim analysis. The DMC is independent and consists of expert clinicians and statisticians with  
9  
10 no competing interest. The planned interim safety analysis took place in June 2018 and no safety  
11  
12 concerns were detected.

13  
14 Besides the interim analysis, safety is continuously observed by blinded online monitoring of individual  
15  
16 growth curves based on the WHO growth charts. If a considerable number of subjects drop below the  
17  
18 median growth curve, an interim analysis will be initiated and the DMC will review unblinded data.

### 19 Harms

20  
21 Any adverse events (AE) which lead to an untoward medical occurrence except for diagnostic and  
22  
23 therapeutic non-invasive and invasive procedures will be recorded during the entire intervention  
24  
25 period until 30 days after last study milk intake. After these 30 days, only AE's which are related to the  
26  
27 intervention treatment will be recorded. Each AE will be rated according to its severity and its  
28  
29 relationship to the study milk. Additionally, severe adverse events (SAE) which e.g. requires inpatient  
30  
31 hospitalization will be reported to the safety manager within 24 hours after notice and will be followed  
32  
33 up until the outcome is known. A participant insurance is in place.

### 34 Monitoring

35  
36 A commercial monitoring company reviews the process, AE reporting, data capturing and  
37  
38 corresponding source data on a regular basis to ensure protocol compliance, accuracy and  
39  
40 completeness.

### 41 Protocol versions

42  
43 Issue date: 15.09.2020; version identifier: 5; number of protocol amendments: 5; initial version: 9  
44  
45 March 2016. First modification: 30 March 2016. Besides adaptation from requests of both ethical  
46  
47 committees before the start of the study and several minor changes due to misspecifications in the  
48  
49 protocol, several clarifications were needed, e.g. to provide more clarity and criteria for study  
50  
51 termination before regular completion of the study, clarification in the statistical interpretation of  
52  
53 secondary endpoints, addition of new secondary endpoints physical activity and HbA1c, the adaptation  
54  
55 to the new European data protection rules in 2018, and a change in exclusion criteria to allow the  
56  
57 inclusion of children that are breastfed once per day. Furthermore, an extensive specification of the  
58  
59 safety interim analysis after inclusion of 260 children was added in 2018 and more details for collection  
60  
61 of AEs separating the collection into two periods, during and after the intervention, were provided.

## Ethics and dissemination

### Ethical considerations

This study is conducted in compliance with the International Conference on Harmonization (ICH) guidelines and the Declaration of Helsinki and complies with Good Clinical Practice guidelines. Ethics approval was obtained from the ethical committees of the university hospitals at the Ludwig-Maximilian University in Munich, Germany (Projekt Nr. 555-15) and at the Institut d'Investigació Sanitaria Pere Virgili, Reus, Spain (Ref. CEIm IISPV 013/2016. All protocol amendments were and will be approved by the ethical committee prior to implementation.

Written informed consent is collected by study staff from all legal guardians prior to study inclusion in adherence with regulatory requirements. Each subject receives oral as well as written informed consent in plain language with adequate time in advance to make an informed decision about study participation. The informed consent form for both study sites is enclosed in the online supplementary.

### Patient and Public Involvement

The study protocol was primarily developed at a public university hospital without involvement of the sponsor. There was no further public or patient involvement.

### Public dissemination and data availability

Study results will be published in peer-reviewed journals and presented on national and international conferences. Study results will also be communicated to participants. Results will be written-up and published by the investigators without help of professional writers. Authorship will depend on relevant contribution to the study. The full study protocol will be made available upon request. The participant-level dataset is not currently planned to be available because consent was not obtained for the sharing of such data from participant's parents / legal guardians or the Institutional Ethics Committees.

### Trial status and time course of the trial

The study started to recruit subjects in September 2016 and finished recruitment of 1,625 children in October 2019. The intervention phase will last until October 2020. The database closure for the analysis of the primary outcome is planned for the first quarter of 2021. The follow-up will be completed around October 2025.

### Funding, role of the sponsor and investigators

The sponsor has allocated a fixed budget for each study center to recruit and follow the subjects. The sponsor is producing the study product and distributes the study product to the study subjects. The sponsor is funding the monitoring of the study. The primary protocol was outlined by the investigators and was jointly further developed by investigators and sponsor. Data management will be primarily

1  
2 done by the sponsor, except parts of the compliance checks, checks of biosamples and body  
3 composition data, as well as nutritional and physical activity data. The primary analysis will be  
4 performed by the sponsor. The investigators have to approve the statistical analysis plan and will have  
5 full access to all the data. Any published interpretation of the data has to be in mutual agreement  
6 between sponsor and investigator without hampering the research freedom of the investigators. The  
7 urinary metabolic profile will be performed by the sponsor, all other laboratory measurements by the  
8 investigators. BK is the coordinating principal investigator with VG being his deputy, JE is principal  
9 investigator in Spain.  
10  
11  
12  
13  
14  
15  
16  
17  
18  
19  
20  
21  
22  
23  
24  
25  
26  
27  
28  
29  
30  
31  
32  
33  
34  
35  
36  
37  
38  
39  
40  
41  
42  
43  
44  
45  
46  
47  
48  
49  
50  
51  
52  
53  
54  
55  
56  
57  
58  
59  
60

For peer review only

## References

1. Koletzko B, von Kries R, Closa R, et al. Lower protein in infant formula is associated with lower weight up to age 2 y: a randomized clinical trial. *Am J Clin Nutr* 2009;89(6):1836-45. doi: 10.3945/ajcn.2008.27091
2. Weber M, Grote V, Closa-Monasterolo R, et al. Lower protein content in infant formula reduces BMI and obesity risk at school age: follow-up of a randomized trial. *Am J Clin Nutr* 2014;99(5):1041-51. doi: 10.3945/ajcn.113.064071 [published Online First: 2014/03/14]
3. Koletzko B, Demmelmair H, Grote V, et al. Optimized protein intakes in term infants support physiological growth and promote long-term health. *Semin Perinatol* 2019;43(7):151153. doi: 10.1053/j.semperi.2019.06.001
4. European-Commission. Commission Delegated Regulation (EU) 2016/127 of 25 September 2015 supplementing Regulation (EU) No 609/2013 of the European Parliament and of the Council as regards the specific compositional and information requirements for infant formula and follow-on formula and as regards requirements on information relating to infant and young child feeding. *Official Journal of the European Union* 2016:L 25/1.
5. Koletzko B, Demmelmair H, Grote V, et al. Optimized protein intakes in term infants support physiological growth and promote long-term health. *Semin Perinatol* 2019;43(7):151153. doi: 10.1053/j.semperi.2019.06.001
6. European Commission. COMMISSION DELEGATED REGULATION (EU) 2016/128 of 25 September 2015 supplementing Regulation (EU) No 609/2013 of the European Parliament and of the Council as regards the specific compositional and information requirements for food for special medical purposes. *Official Journal of the European Union* 2016;L25/30 doi: [http://data.europa.eu/eli/reg\\_del/2016/128/oj](http://data.europa.eu/eli/reg_del/2016/128/oj)
7. Parizkova J, Rolland-Cachera MF. High proteins early in life as a predisposition for later obesity and further health risks. *Nutrition* 1997;13(9):818-9. doi: 10.1016/s0899-9007(97)00196-2 [published Online First: 1997/09/18]
8. Karaolis-Danckert N, Gunther AL, Kroke A, et al. How early dietary factors modify the effect of rapid weight gain in infancy on subsequent body-composition development in term children whose birth weight was appropriate for gestational age. *Am J Clin Nutr* 2007;86(6):1700-08. doi: 86/6/1700 [pii] [published Online First: 2007/12/11]
9. Gunther AL, Buyken AE, Kroke A. Protein intake during the period of complementary feeding and early childhood and the association with body mass index and percentage body fat at 7 y of age. *Am J Clin Nutr* 2007;85(6):1626-33. doi: 10.1093/ajcn/85.6.1626 [published Online First: 2007/06/09]
10. Günther ALB, Remer T, Kroke A, et al. Early protein intake and later obesity risk: which protein sources at which time points throughout infancy and childhood are important for body mass index and body fat percentage at 7 y of age? *Am J Clin Nutr* 2007;86(6):1765-72.
11. Ohlund I, Hernell O, Hornell A, et al. BMI at 4 years of age is associated with previous and current protein intake and with paternal BMI. *Eur J Clin Nutr* 2010;64(2):138-45. doi: 10.1038/ejcn.2009.132 [published Online First: 2009/11/12]
12. Hornell A, Lagstrom H, Lande B, et al. Protein intake from 0 to 18 years of age and its relation to health: a systematic literature review for the 5th Nordic Nutrition Recommendations. *Food Nutr Res* 2013;57 doi: 10.3402/fnr.v57i0.21083 [published Online First: 2013/05/30]
13. Koletzko B, von Kries R, Closa Monasterolo R, et al. Infant feeding and later obesity risk. In: Koletzko B, Desci T, Molnár D, et al., eds. *Early Nutrition Programming and Health Outcomes in Later Life*. Houten, Netherlands: Springer Netherlands 2009:15-29.
14. Rzehak P, Grote V, Lattka E, et al. Associations of IGF-1 gene variants and milk protein intake with IGF-I concentrations in infants at age 6 months - results from a randomized clinical trial. *Growth Horm IGF Res* 2013;23(5):149-58. doi: 10.1016/j.ghir.2013.05.002
15. Socha P, Grote V, Gruszfeld D, et al. Milk protein intake, the metabolic-endocrine response, and growth in infancy: data from a randomized clinical trial. *Am J Clin Nutr* 2011;94(6 Suppl):1776S-84S. doi: 10.3945/ajcn.110.000596 [published Online First: 2011/08/19]



16. Kirchberg FF, Harder U, Weber M, et al. Dietary protein intake affects amino acid and acylcarnitine metabolism in infants aged 6 months. *J Clin Endocrinol Metab* 2015;100(1):149-58. doi: 10.1210/jc.2014-3157
17. Rzehak P, Grote V, Lattka E, et al. Associations of IGF-1 gene variants and milk protein intake with IGF-I concentrations in infants at age 6 months — Results from a randomized clinical trial. *Growth Horm IGF Res* 2013;23(5):149-58. doi: 10.1016/j.ghir.2013.05.002 [published Online First: 2013/06/27]
18. Ketelslegers JM, Maiter D, Maes M, et al. Nutritional regulation of insulin-like growth factor-I. *Metabolism* 1995;44(10 Suppl 4):50-7. doi: 10.1016/0026-0495(95)90221-x [published Online First: 1995/10/01]
19. Thissen JP, Ketelslegers JM, Underwood LE. Nutritional regulation of the insulin-like growth factors. *Endocr Rev* 1994;15(1):80-101. doi: 10.1210/edrv-15-1-80 [published Online First: 1994/02/01]
20. Ketelslegers JM, Maiter D, Maes M, et al. Nutritional regulation of insulin-like growth factor-I. *Metabolism* 1995;44(10 Suppl 4):50-7. [published Online First: 1995/10/01]
21. Hoppe C, Molgaard C, Dalum C, et al. Differential effects of casein versus whey on fasting plasma levels of insulin, IGF-1 and IGF-1/IGFBP-3: results from a randomized 7-day supplementation study in prepubertal boys. *Eur J Clin Nutr* 2009;63(9):1076-83. doi: 10.1038/ejcn.2009.34 [published Online First: 2009/05/28]
22. Lambert J, Agostoni C, Elmadfa I, et al. Dietary intake and nutritional status of children and adolescents in Europe. *Br J Nutr* 2004;92 Suppl 2:S147-211. doi: 10.1079/bjn20041160 [published Online First: 2004/11/04]
23. Suthuvoravut U, Abiodun P, Chomtho S, et al. Composition of Follow-Up Formula for Young Children Aged 12-36 Months: Recommendations of an International Expert Group Coordinated by the Nutrition Association of Thailand and the Early Nutrition Academy. *Ann Nutr Metab* 2015;67(2):119-32 doi: 10.1159/000438495
24. Suthutvoravut U, Abiodun PO, Chomtho S, et al. Composition of Follow-Up Formula for Young Children Aged 12-36 Months: Recommendations of an International Expert Group Coordinated by the Nutrition Association of Thailand and the Early Nutrition Academy. *Ann Nutr Metab* 2015;67(2):119-32. doi: 10.1159/000438495
25. Hilbig A, Kersting M. Effects of age and time on energy and macronutrient intake in German infants and young children: results of the DONALD study. *J Pediatr Gastroenterol Nutr* 2006;43(4):518-24. doi: 10.1097/01.mpg.0000229548.69702.aa [published Online First: 2006/10/13]
26. Damianidi L, Gruszfeld D, Verduci E, et al. Protein intakes and their nutritional sources during the first 2 years of life: secondary data evaluation from the European Childhood Obesity Project. *Eur J Clin Nutr* 2016;70(11):1291-97. doi: 10.1038/ejcn.2016.108
27. de Onis M, Onyango AW, Van den Broeck J, et al. Measurement and standardization protocols for anthropometry used in the construction of a new international growth reference. *Food Nutr Bull* 2004;25(1 Suppl):S27-36.
28. Pala V, Reisch LA, Lissner L. Dietary Behaviour in Children, Adolescents and Families: The Eating Habits Questionnaire (EHQ). In: Bammann K, Lissner L, Pigeot I, et al., eds. Instruments for Health Surveys in Children and Adolescents. Cham: Springer Nature Switzerland 2019:103-33.
29. Dehne LI, Klemm C, Henseler G, et al. The German Food Code and Nutrient Data Base (BLS II.2). *Eur J Epidemiol* 1999;15(4):355-9. doi: 10.1023/a:1007534427681 [published Online First: 1999/07/22]
30. Cole TJ. Establishing a standard definition for child overweight and obesity worldwide: international survey. *Bmj* 2000;320(7244):1240-40. doi: 10.1136/bmj.320.7244.1240
31. Sauzet O, Rehse J, Breiding JH. DistdichoR a R Package for the distributional dichotomisation of continuous outcomes arXiv:1809.03279, 2018.

### Authors' Statement

VG and VJ wrote the manuscript. VG and BK provided the original outline of the protocol; JE, MZ, MG, and DG participated in the design and set-up of the study. BK, JE, MZ, MG, and DG critically revised the content of the manuscript.

### Funding statement

This study is sponsored by Soci t  de Produits Nestl  S.A., Switzerland (Avenue Nestl  55, CH-1800 Vevey). The work of VG, VJ and BK is/was financially supported in part by the European Commission H2020 Programme Lifecycle-733206, the European Joint Programming Initiative Project NutriPROGRAM, the German Ministry of Education and Research, Berlin (Grant Nr. 01 GI 0825), the German Research Council (Ko912/12-1 and INST 409/224-1 FUGG).

### Conflict of interest

The institutions of VG, VJ, BK, JE, MZ, MG receive funding by the sponsor to conduct the study- and DG is employed by the sponsor of the study.

## Tables

Table 1: Inclusion and Exclusion criteria of the Tomi trial

| Inclusion criteria                                                                                                                                                                                                                                                                                                                                                                                                                                                                                                                                                                                                                                                                                                                                                     | Exclusion criteria                                                                                                                                                                                                                                                                                                                                                                                                                                                                                                                                                       |
|------------------------------------------------------------------------------------------------------------------------------------------------------------------------------------------------------------------------------------------------------------------------------------------------------------------------------------------------------------------------------------------------------------------------------------------------------------------------------------------------------------------------------------------------------------------------------------------------------------------------------------------------------------------------------------------------------------------------------------------------------------------------|--------------------------------------------------------------------------------------------------------------------------------------------------------------------------------------------------------------------------------------------------------------------------------------------------------------------------------------------------------------------------------------------------------------------------------------------------------------------------------------------------------------------------------------------------------------------------|
| <ul style="list-style-type: none"> <li>• Legal guardians signed the written informed consent.</li> <li>• Child was born full term (<math>\geq 37 + 0</math> weeks of gestation).</li> <li>• Child's birth weight is between 2.5 and 4.5 kg.</li> <li>• Child is born from a singleton pregnancy.</li> <li>• Child's age at enrolment is between 11.5 and 13.5 month.</li> <li>• Child's legal guardians are of legal age and they have sufficient local language skills to understand the study information, informed consent and study procedure.</li> <li>• Child and child's parents are willing to fulfil the requirements of the study protocol and procedures.</li> <li>• Child's family is available via phone or e-mail throughout the whole study.</li> </ul> | <ul style="list-style-type: none"> <li>• Infant who is breastfed at least twice in 24 hours at time of enrolment.</li> <li>• Infant who usually does not drink 300 ml of cow's milk and/or formula milk per day.</li> <li>• Cow's milk allergy.</li> <li>• Lactose intolerance.</li> <li>• Institutionalized children.</li> <li>• Diagnosed disorder, which interfere with nutrition or growth (e.g. celiac disease, inflammatory bowel disease).</li> <li>• Children who participated in any other interventional clinical trial 4 weeks prior to enrolment.</li> </ul> |

Table 2: Nutritional composition of the interventional products (toddler milks)

|                       | <b>Experimental toddler milk</b><br>(ready to drink, per 100ml) | <b>Control toddler milk</b><br>(ready to drink, per 100ml) |
|-----------------------|-----------------------------------------------------------------|------------------------------------------------------------|
| Energy                | 201 KJ/48 kcal                                                  | 201 KJ/48 kcal                                             |
| Protein               | 0.72 g                                                          | 2.95 g                                                     |
| Fat                   | 2.0 g                                                           | 1.0 g                                                      |
| Saturated fatty acids | 0.8 g                                                           | 0.4 g                                                      |
| Carbohydrates         | 6.7 g                                                           | 6.7 g                                                      |
| Lactose               | 6.7 g                                                           | 6.6 g                                                      |
| Other                 | <0.1 g                                                          | <0.1 g                                                     |
| Salt                  | 0.1 g                                                           | 0.1 g                                                      |
| Vitamines             |                                                                 |                                                            |
| Vitamine A            | 71 µg                                                           | 66 µg                                                      |
| Vitamine D            | 1.2 µg                                                          | 1.3 µg                                                     |
| Folic acid            | 14.9 µg                                                         | 14.2 µg                                                    |
| Vitamine B12          | 0.2 µg                                                          | 0.2 µg                                                     |
| Vitamine C            | 6.4 mg                                                          | 6.9 mg                                                     |
| Minerals              |                                                                 |                                                            |
| Calcium               | 115 mg                                                          | 115 mg                                                     |
| Micronutrients        |                                                                 |                                                            |
| Iron                  | 0.5 mg                                                          | 0.5 mg                                                     |
| Zinc                  | 0.3 mg                                                          | 0.6 mg                                                     |

Figure 1: Assessments in children participating in the ToMI trial

For peer review only

1  
2  
3  
4  
5  
6  
7  
8  
9  
10  
11  
12  
13  
14  
15  
16  
17  
18  
19  
20  
21  
22  
23  
24  
25  
26  
27  
28  
29  
30  
31  
32  
33  
34  
35  
36  
37  
38  
39  
40  
41  
42  
43  
44  
45  
46  
47  
48  
49  
50  
51  
52  
53  
54  
55  
56  
57  
58  
59  
60

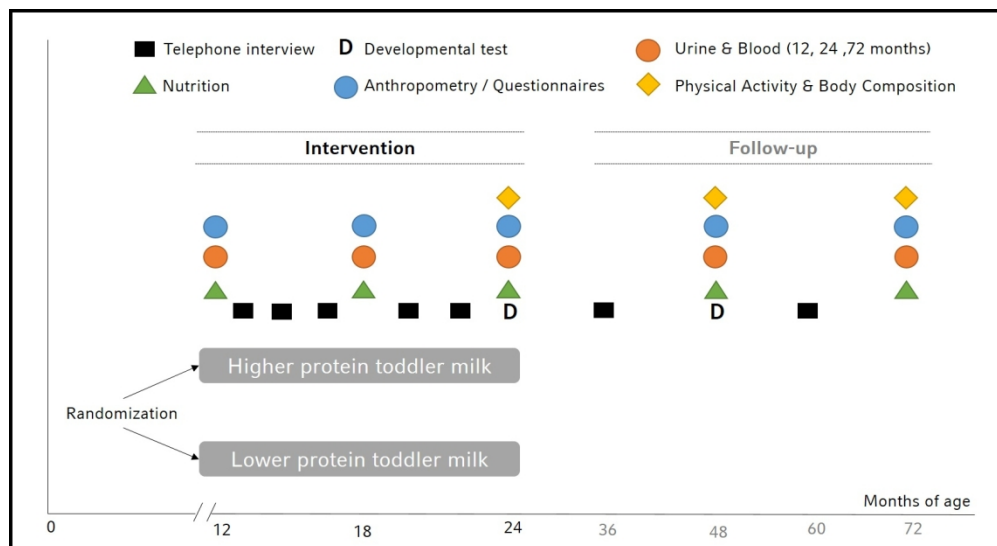

Assessments in children participating in the ToMI trial

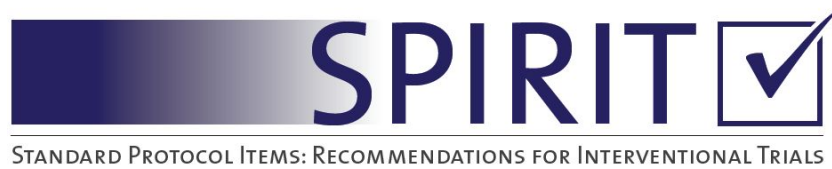

SPIRIT 2013 Checklist: Recommended items to address in a clinical trial protocol and related documents\*

| Section/item                      | Item No | Description                                                                                                                                                                                                                                                                              | Check/page |
|-----------------------------------|---------|------------------------------------------------------------------------------------------------------------------------------------------------------------------------------------------------------------------------------------------------------------------------------------------|------------|
| <b>Administrative information</b> |         |                                                                                                                                                                                                                                                                                          |            |
| Title                             | 1       | Descriptive title identifying the study design, population, interventions, and, if applicable, trial acronym                                                                                                                                                                             | Y          |
| Trial registration                | 2a      | Trial identifier and registry name. If not yet registered, name of intended registry                                                                                                                                                                                                     | 2          |
|                                   | 2b      | All items from the World Health Organization Trial Registration Data Set                                                                                                                                                                                                                 |            |
| Protocol version                  | 3       | Date and version identifier                                                                                                                                                                                                                                                              | 10         |
| Funding                           | 4       | Sources and types of financial, material, and other support                                                                                                                                                                                                                              | 13         |
| Roles and responsibilities        | 5a      | Names, affiliations, and roles of protocol contributors                                                                                                                                                                                                                                  | 1, 13      |
|                                   | 5b      | Name and contact information for the trial sponsor                                                                                                                                                                                                                                       | 13         |
|                                   | 5c      | Role of study sponsor and funders, if any, in study design; collection, management, analysis, and interpretation of data; writing of the report; and the decision to submit the report for publication, including whether they will have ultimate authority over any of these activities | 13         |
|                                   | 5d      | Composition, roles, and responsibilities of the coordinating centre, steering committee, endpoint adjudication committee, data management team, and other individuals or groups overseeing the trial, if applicable (see Item 21a for data monitoring committee)                         | 13         |
| <b>Introduction</b>               |         |                                                                                                                                                                                                                                                                                          |            |
| Background and rationale          | 6a      | Description of research question and justification for undertaking the trial, including summary of relevant studies (published and unpublished) examining benefits and harms for each intervention                                                                                       | 3          |
|                                   | 6b      | Explanation for choice of comparators                                                                                                                                                                                                                                                    |            |
| Objectives                        | 7       | Specific objectives or hypotheses                                                                                                                                                                                                                                                        | 4          |
| Trial design                      | 8       | Description of trial design including type of trial (eg, parallel group, crossover, factorial, single group), allocation ratio, and framework (eg, superiority, equivalence, noninferiority, exploratory)                                                                                | 4          |

## Methods: Participants, interventions, and outcomes

|                      |     |                                                                                                                                                                                                                                                                                                                                                                                |          |
|----------------------|-----|--------------------------------------------------------------------------------------------------------------------------------------------------------------------------------------------------------------------------------------------------------------------------------------------------------------------------------------------------------------------------------|----------|
| Study setting        | 9   | Description of study settings (eg, community clinic, academic hospital) and list of countries where data will be collected. Reference to where list of study sites can be obtained                                                                                                                                                                                             | 4        |
| Eligibility criteria | 10  | Inclusion and exclusion criteria for participants. If applicable, eligibility criteria for study centres and individuals who will perform the interventions (eg, surgeons, psychotherapists)                                                                                                                                                                                   | 4, Table |
| Interventions        | 11a | Interventions for each group with sufficient detail to allow replication, including how and when they will be administered                                                                                                                                                                                                                                                     | 4, Table |
|                      | 11b | Criteria for discontinuing or modifying allocated interventions for a given trial participant (eg, drug dose change in response to harms, participant request, or improving/worsening disease)                                                                                                                                                                                 | 5        |
|                      | 11c | Strategies to improve adherence to intervention protocols, and any procedures for monitoring adherence (eg, drug tablet return, laboratory tests)                                                                                                                                                                                                                              | 10       |
|                      | 11d | Relevant concomitant care and interventions that are permitted or prohibited during the trial                                                                                                                                                                                                                                                                                  | -        |
| Outcomes             | 12  | Primary, secondary, and other outcomes, including the specific measurement variable (eg, systolic blood pressure), analysis metric (eg, change from baseline, final value, time to event), method of aggregation (eg, median, proportion), and time point for each outcome. Explanation of the clinical relevance of chosen efficacy and harm outcomes is strongly recommended | 5,6,     |
| Participant timeline | 13  | Time schedule of enrolment, interventions (including any run-ins and washouts), assessments, and visits for participants. A schematic diagram is highly recommended (see Figure)                                                                                                                                                                                               | 7        |
| Sample size          | 14  | Estimated number of participants needed to achieve study objectives and how it was determined, including clinical and statistical assumptions supporting any sample size calculations                                                                                                                                                                                          | 6        |
| Recruitment          | 15  | Strategies for achieving adequate participant enrolment to reach target sample size                                                                                                                                                                                                                                                                                            | 6        |

## Methods: Assignment of interventions (for controlled trials)

### Allocation:

|                     |     |                                                                                                                                                                                                                                                                                                                                                          |   |
|---------------------|-----|----------------------------------------------------------------------------------------------------------------------------------------------------------------------------------------------------------------------------------------------------------------------------------------------------------------------------------------------------------|---|
| Sequence generation | 16a | Method of generating the allocation sequence (eg, computer-generated random numbers), and list of any factors for stratification. To reduce predictability of a random sequence, details of any planned restriction (eg, blocking) should be provided in a separate document that is unavailable to those who enrol participants or assign interventions | 7 |
|---------------------|-----|----------------------------------------------------------------------------------------------------------------------------------------------------------------------------------------------------------------------------------------------------------------------------------------------------------------------------------------------------------|---|



|    |                                                           |     |                                                                          |      |
|----|-----------------------------------------------------------|-----|--------------------------------------------------------------------------|------|
| 1  |                                                           |     |                                                                          |      |
| 2  | Allocation                                                | 16b | Mechanism of implementing the allocation sequence (eg, central           |      |
| 3  | concealment                                               |     | telephone; sequentially numbered, opaque, sealed envelopes),             |      |
| 4  | mechanism                                                 |     | describing any steps to conceal the sequence until interventions are     |      |
| 5  |                                                           |     | assigned                                                                 |      |
| 6  |                                                           |     |                                                                          |      |
| 7  | Implementation                                            | 16c | Who will generate the allocation sequence, who will enrol participants,  | 7    |
| 8  |                                                           |     | and who will assign participants to interventions                        |      |
| 9  |                                                           |     |                                                                          |      |
| 10 | Blinding                                                  | 17a | Who will be blinded after assignment to interventions (eg, trial         | 7    |
| 11 | (masking)                                                 |     | participants, care providers, outcome assessors, data analysts), and     |      |
| 12 |                                                           |     | how                                                                      |      |
| 13 |                                                           | 17b | If blinded, circumstances under which unblinding is permissible, and     | 7    |
| 14 |                                                           |     | procedure for revealing a participant's allocated intervention during    |      |
| 15 |                                                           |     | the trial                                                                |      |
| 16 |                                                           |     |                                                                          |      |
| 17 |                                                           |     |                                                                          |      |
| 18 |                                                           |     |                                                                          |      |
| 19 |                                                           |     |                                                                          |      |
| 20 | <b>Methods: Data collection, management, and analysis</b> |     |                                                                          |      |
| 21 | Data collection                                           | 18a | Plans for assessment and collection of outcome, baseline, and other      | 7,8  |
| 22 | methods                                                   |     | trial data, including any related processes to promote data quality (eg, |      |
| 23 |                                                           |     | duplicate measurements, training of assessors) and a description of      |      |
| 24 |                                                           |     | study instruments (eg, questionnaires, laboratory tests) along with      |      |
| 25 |                                                           |     | their reliability and validity, if known. Reference to where data        |      |
| 26 |                                                           |     | collection forms can be found, if not in the protocol                    |      |
| 27 |                                                           | 18b | Plans to promote participant retention and complete follow-up,           | 7    |
| 28 |                                                           |     | including list of any outcome data to be collected for participants who  |      |
| 29 |                                                           |     | discontinue or deviate from intervention protocols                       |      |
| 30 |                                                           |     |                                                                          |      |
| 31 | Data                                                      | 19  | Plans for data entry, coding, security, and storage, including any       | 8,10 |
| 32 | management                                                |     | related processes to promote data quality (eg, double data entry;        |      |
| 33 |                                                           |     | range checks for data values). Reference to where details of data        |      |
| 34 |                                                           |     | management procedures can be found, if not in the protocol               |      |
| 35 |                                                           |     |                                                                          |      |
| 36 | Statistical                                               | 20a | Statistical methods for analysing primary and secondary outcomes.        | 8,9  |
| 37 | methods                                                   |     | Reference to where other details of the statistical analysis plan can be |      |
| 38 |                                                           |     | found, if not in the protocol                                            |      |
| 39 |                                                           | 20b | Methods for any additional analyses (eg, subgroup and adjusted           | 9    |
| 40 |                                                           |     | analyses)                                                                |      |
| 41 |                                                           | 20c | Definition of analysis population relating to protocol non-adherence     | 8    |
| 42 |                                                           |     | (eg, as randomised analysis), and any statistical methods to handle      |      |
| 43 |                                                           |     | missing data (eg, multiple imputation)                                   |      |
| 44 |                                                           |     |                                                                          |      |
| 45 |                                                           |     |                                                                          |      |
| 46 |                                                           |     |                                                                          |      |
| 47 |                                                           |     |                                                                          |      |
| 48 |                                                           |     |                                                                          |      |
| 49 |                                                           |     |                                                                          |      |
| 50 |                                                           |     |                                                                          |      |
| 51 |                                                           |     |                                                                          |      |
| 52 | <b>Methods: Monitoring</b>                                |     |                                                                          |      |
| 53 |                                                           |     |                                                                          |      |
| 54 | Data monitoring                                           | 21a | Composition of data monitoring committee (DMC); summary of its role      | 10   |
| 55 |                                                           |     | and reporting structure; statement of whether it is independent from     |      |
| 56 |                                                           |     | the sponsor and competing interests; and reference to where further      |      |
| 57 |                                                           |     | details about its charter can be found, if not in the protocol.          |      |
| 58 |                                                           |     | Alternatively, an explanation of why a DMC is not needed                 |      |
| 59 |                                                           |     |                                                                          |      |
| 60 |                                                           |     |                                                                          |      |

|    |          |     |                                                                                                                                                                                   |    |
|----|----------|-----|-----------------------------------------------------------------------------------------------------------------------------------------------------------------------------------|----|
| 1  |          |     |                                                                                                                                                                                   |    |
| 2  |          | 21b | Description of any interim analyses and stopping guidelines, including who will have access to these interim results and make the final decision to terminate the trial           | 10 |
| 3  |          |     |                                                                                                                                                                                   |    |
| 4  |          |     |                                                                                                                                                                                   |    |
| 5  |          |     |                                                                                                                                                                                   |    |
| 6  | Harms    | 22  | Plans for collecting, assessing, reporting, and managing solicited and spontaneously reported adverse events and other unintended effects of trial interventions or trial conduct | 10 |
| 7  |          |     |                                                                                                                                                                                   |    |
| 8  |          |     |                                                                                                                                                                                   |    |
| 9  |          |     |                                                                                                                                                                                   |    |
| 10 |          |     |                                                                                                                                                                                   |    |
| 11 | Auditing | 23  | Frequency and procedures for auditing trial conduct, if any, and whether the process will be independent from investigators and the sponsor                                       | 10 |
| 12 |          |     |                                                                                                                                                                                   |    |
| 13 |          |     |                                                                                                                                                                                   |    |
| 14 |          |     |                                                                                                                                                                                   |    |

## 15 Ethics and dissemination

|    |                               |     |                                                                                                                                                                                                                                                                                     |     |
|----|-------------------------------|-----|-------------------------------------------------------------------------------------------------------------------------------------------------------------------------------------------------------------------------------------------------------------------------------------|-----|
| 16 |                               |     |                                                                                                                                                                                                                                                                                     |     |
| 17 | Research ethics approval      | 24  | Plans for seeking research ethics committee/institutional review board (REC/IRB) approval                                                                                                                                                                                           | 11  |
| 18 |                               |     |                                                                                                                                                                                                                                                                                     |     |
| 19 |                               |     |                                                                                                                                                                                                                                                                                     |     |
| 20 | Protocol amendments           | 25  | Plans for communicating important protocol modifications (eg, changes to eligibility criteria, outcomes, analyses) to relevant parties (eg, investigators, REC/IRBs, trial participants, trial registries, journals, regulators)                                                    | 11  |
| 21 |                               |     |                                                                                                                                                                                                                                                                                     |     |
| 22 |                               |     |                                                                                                                                                                                                                                                                                     |     |
| 23 |                               |     |                                                                                                                                                                                                                                                                                     |     |
| 24 |                               |     |                                                                                                                                                                                                                                                                                     |     |
| 25 |                               |     |                                                                                                                                                                                                                                                                                     |     |
| 26 | Consent or assent             | 26a | Who will obtain informed consent or assent from potential trial participants or authorised surrogates, and how (see Item 32)                                                                                                                                                        | 11  |
| 27 |                               |     |                                                                                                                                                                                                                                                                                     |     |
| 28 |                               |     |                                                                                                                                                                                                                                                                                     |     |
| 29 |                               | 26b | Additional consent provisions for collection and use of participant data and biological specimens in ancillary studies, if applicable                                                                                                                                               | yes |
| 30 |                               |     |                                                                                                                                                                                                                                                                                     |     |
| 31 |                               |     |                                                                                                                                                                                                                                                                                     |     |
| 32 | Confidentiality               | 27  | How personal information about potential and enrolled participants will be collected, shared, and maintained in order to protect confidentiality before, during, and after the trial                                                                                                | 8   |
| 33 |                               |     |                                                                                                                                                                                                                                                                                     |     |
| 34 |                               |     |                                                                                                                                                                                                                                                                                     |     |
| 35 |                               |     |                                                                                                                                                                                                                                                                                     |     |
| 36 |                               |     |                                                                                                                                                                                                                                                                                     |     |
| 37 | Declaration of interests      | 28  | Financial and other competing interests for principal investigators for the overall trial and each study site                                                                                                                                                                       | 14  |
| 38 |                               |     |                                                                                                                                                                                                                                                                                     |     |
| 39 |                               |     |                                                                                                                                                                                                                                                                                     |     |
| 40 | Access to data                | 29  | Statement of who will have access to the final trial dataset, and disclosure of contractual agreements that limit such access for investigators                                                                                                                                     | 12  |
| 41 |                               |     |                                                                                                                                                                                                                                                                                     |     |
| 42 |                               |     |                                                                                                                                                                                                                                                                                     |     |
| 43 |                               |     |                                                                                                                                                                                                                                                                                     |     |
| 44 |                               |     |                                                                                                                                                                                                                                                                                     |     |
| 45 | Ancillary and post-trial care | 30  | Provisions, if any, for ancillary and post-trial care, and for compensation to those who suffer harm from trial participation                                                                                                                                                       | 10  |
| 46 |                               |     |                                                                                                                                                                                                                                                                                     |     |
| 47 |                               |     |                                                                                                                                                                                                                                                                                     |     |
| 48 | Dissemination policy          | 31a | Plans for investigators and sponsor to communicate trial results to participants, healthcare professionals, the public, and other relevant groups (eg, via publication, reporting in results databases, or other data sharing arrangements), including any publication restrictions | 11  |
| 49 |                               |     |                                                                                                                                                                                                                                                                                     |     |
| 50 |                               |     |                                                                                                                                                                                                                                                                                     |     |
| 51 |                               |     |                                                                                                                                                                                                                                                                                     |     |
| 52 |                               |     |                                                                                                                                                                                                                                                                                     |     |
| 53 |                               |     |                                                                                                                                                                                                                                                                                     |     |
| 54 |                               | 31b | Authorship eligibility guidelines and any intended use of professional writers                                                                                                                                                                                                      | 11  |
| 55 |                               |     |                                                                                                                                                                                                                                                                                     |     |
| 56 |                               |     |                                                                                                                                                                                                                                                                                     |     |
| 57 |                               | 31c | Plans, if any, for granting public access to the full protocol, participant-level dataset, and statistical code                                                                                                                                                                     | 11  |
| 58 |                               |     |                                                                                                                                                                                                                                                                                     |     |
| 59 |                               |     |                                                                                                                                                                                                                                                                                     |     |
| 60 |                               |     |                                                                                                                                                                                                                                                                                     |     |

## Appendices

|                            |    |                                                                                                                                                                                                |            |
|----------------------------|----|------------------------------------------------------------------------------------------------------------------------------------------------------------------------------------------------|------------|
| Informed consent materials | 32 | Model consent form and other related documentation given to participants and authorised surrogates                                                                                             | Supplement |
| Biological specimens       | 33 | Plans for collection, laboratory evaluation, and storage of biological specimens for genetic or molecular analysis in the current trial and for future use in ancillary studies, if applicable | No         |

\*It is strongly recommended that this checklist be read in conjunction with the SPIRIT 2013 Explanation & Elaboration for important clarification on the items. Amendments to the protocol should be tracked and dated. The SPIRIT checklist is copyrighted by the SPIRIT Group under the Creative Commons "[Attribution-NonCommercial-NoDerivs 3.0 Unported](#)" license.

For peer review only

# BMJ Open

## Effect of milk protein content in toddler formula on later BMI and obesity risk: Protocol of a multicentre randomized controlled trial (ToMI)

|                                 |                                                                                                                                                                                                                                                                                                                                                                                                                                                                                                                                                   |
|---------------------------------|---------------------------------------------------------------------------------------------------------------------------------------------------------------------------------------------------------------------------------------------------------------------------------------------------------------------------------------------------------------------------------------------------------------------------------------------------------------------------------------------------------------------------------------------------|
| Journal:                        | <i>BMJ Open</i>                                                                                                                                                                                                                                                                                                                                                                                                                                                                                                                                   |
| Manuscript ID                   | bmjopen-2020-048290.R1                                                                                                                                                                                                                                                                                                                                                                                                                                                                                                                            |
| Article Type:                   | Protocol                                                                                                                                                                                                                                                                                                                                                                                                                                                                                                                                          |
| Date Submitted by the Author:   | 14-Sep-2021                                                                                                                                                                                                                                                                                                                                                                                                                                                                                                                                       |
| Complete List of Authors:       | Grote, Veit; University Hospital Munich, Dr. von Hauner Children's Hospital<br>Jaeger, Vanessa; University Hospital Munich, Dr. von Hauner Children's Hospital<br>Escribano, Joaquin; Universitat Rovira i Virgili; Hospital Universitari Sant Joan de Reus<br>Zaragoza, Marta; Universitat Rovira i Virgili; Hospital Universitari de Tarragona Joan XXIII<br>Gispert, Mariona; Universitat Rovira i Virgili<br>Grathwohl, Dominik; Nestle Research Center<br>Koletzko, Berthold; University Hospital Munich, Dr. von Hauner Children's Hospital |
| <b>Primary Subject Heading</b>: | Paediatrics                                                                                                                                                                                                                                                                                                                                                                                                                                                                                                                                       |
| Secondary Subject Heading:      | Nutrition and metabolism                                                                                                                                                                                                                                                                                                                                                                                                                                                                                                                          |
| Keywords:                       | NUTRITION & DIETETICS, PAEDIATRICS, Other metabolic, e.g. iron, porphyria < DIABETES & ENDOCRINOLOGY                                                                                                                                                                                                                                                                                                                                                                                                                                              |
|                                 |                                                                                                                                                                                                                                                                                                                                                                                                                                                                                                                                                   |

SCHOLARONE™  
Manuscripts



I, the Submitting Author has the right to grant and does grant on behalf of all authors of the Work (as defined in the below author licence), an exclusive licence and/or a non-exclusive licence for contributions from authors who are: i) UK Crown employees; ii) where BMJ has agreed a CC-BY licence shall apply, and/or iii) in accordance with the terms applicable for US Federal Government officers or employees acting as part of their official duties; on a worldwide, perpetual, irrevocable, royalty-free basis to BMJ Publishing Group Ltd ("BMJ") its licensees and where the relevant Journal is co-owned by BMJ to the co-owners of the Journal, to publish the Work in this journal and any other BMJ products and to exploit all rights, as set out in our [licence](#).

The Submitting Author accepts and understands that any supply made under these terms is made by BMJ to the Submitting Author unless you are acting as an employee on behalf of your employer or a postgraduate student of an affiliated institution which is paying any applicable article publishing charge ("APC") for Open Access articles. Where the Submitting Author wishes to make the Work available on an Open Access basis (and intends to pay the relevant APC), the terms of reuse of such Open Access shall be governed by a Creative Commons licence – details of these licences and which [Creative Commons](#) licence will apply to this Work are set out in our licence referred to above.

Other than as permitted in any relevant BMJ Author's Self Archiving Policies, I confirm this Work has not been accepted for publication elsewhere, is not being considered for publication elsewhere and does not duplicate material already published. I confirm all authors consent to publication of this Work and authorise the granting of this licence.

1  
2 **Effect of milk protein content in toddler formula on later BMI and obesity risk: Protocol**  
3 **of a multicentre randomized controlled trial (ToMI)**  
4

5 Veit Grote<sup>1</sup>, Vanessa Jäger<sup>1</sup>, Joaquin Escribano<sup>2,3</sup>, Marta Zaragoza-Jordana<sup>2,4</sup>, Mariona  
6 Gispert-Llaurado<sup>2</sup>, Dominik Grathwohl<sup>5</sup>, Berthold Koletzko<sup>1</sup>  
7  
8  
9

10  
11 <sup>1</sup>Div. Metabolic and Nutritional Medicine, Dept. of Paediatrics, Dr. von Hauner Children's  
12 Hospital, University Hospital, LMU – Ludwig-Maximilians-Universität Munich, Germany  
13

14 <sup>2</sup>Universitat Rovira i Virgili, IISPV, Pediatric Nutrition and Human Development Research  
15 Unit, Spain  
16  
17

18 <sup>3</sup>Hospital Universitari Sant Joan de Reus, Spain  
19

20 <sup>4</sup>Hospital Universitari de Tarragona Joan XXIII, Spain  
21

22 <sup>5</sup>Nestlé Research, Lausanne, Switzerland  
23  
24  
25  
26  
27  
28

29 Corresponding author:

30 Prof. Dr. med. Berthold Koletzko, Dr. von Hauner Children's Hospital, Lindwurmstr. 4,  
31 80337 Munich, Germany. Email: Berthold.Koletzko@med.uni-muenchen.de  
32  
33  
34  
35  
36  
37  
38  
39  
40  
41  
42  
43  
44  
45  
46  
47  
48  
49  
50  
51  
52  
53  
54  
55  
56  
57  
58  
59  
60

## Abstract

**Introduction** Reduction of milk protein content in infant formula provided during the first year of life has been shown to reduce early weight gain and obesity later in life. While rapid weight gain during the first two years of life is one of the strongest early predictors of obesity, the role of animal protein intake beyond the first year of life is unclear. The aim of this study is to examine the role of milk protein during the second year of life in healthy children on weight gain and obesity risk in preschool age.

**Methods and analysis** This randomized, double-blinded study enrolled 1,618 children aged 11.5 to 13.5 months in Spain and Germany into 2 groups receiving isocaloric toddler milk with differing protein content during the second year of life. The experimental formula contains 1.5g/100kcal and the control formula 6.15g/100kcal protein and otherwise equal formula composition, except for modified fat content to achieve equal energy density. The primary endpoint is BMI-for-age z-score at the age of 24 months adjusted for BMI at 12 months of age. The children are followed until 6 years of age.

**Ethics and dissemination** Ethics approval was obtained from the ethical committees of the LMU University Hospital Munich, Germany (Nr. 555-15) and at Institut d'Investigació Sanitaria Pere Virgili, Reus, Spain (Ref. CEIm IISPV 013/2016). We aim at publishing results in peer-reviewed journals and sharing of results with study participants.

**Trial registration number** NCT02907502

### Strengths and limitations of this study

- This study uses a randomized and double blinded design to minimize potential confounding and biases.
- The multicentre design of this study with sites in Spain and Germany increases external validity of study results.
- The follow-up of the cohort is planned until six years of age and will provide the possibility to examine long-term effects of the intervention.
- Conclusions will be limited to effects of dairy protein provided with milk based drinks in the second year of life and cannot be extrapolated to effects of total dietary protein supply.

### Keywords

Toddler milk; milk protein; protein intake; clinical trial; obesity; BMI

## Introduction

A randomized double blind controlled clinical trial demonstrated that reducing protein intake in infant formula provided in the first year of life lowers early weight gain until 2 years of age<sup>1</sup>. Data from the same study (CHildhood Obesity Project [CHOP] trial) demonstrated that lower protein supply with formula fed in the first year of life also reduced BMI and obesity risk at school age<sup>2</sup>. The results of the CHOP trial contributed to enhanced promotion of breastfeeding and efforts in reducing the protein content in infant and follow-on formula<sup>3,4</sup>.

It remains unclear which child age period is most sensitive to a modified protein intake, and whether limiting protein intake during the second year of life would also achieve benefits for prevention of excessive weight gain and later obesity. Observational studies find a consistent association of later overweight and obesity with total protein intake and in particular of milk protein intake, not only during infancy but also during the preschool age<sup>5-9</sup>. A systematic review on the effects of dietary protein intake concluded that the first 2 years of life are the most sensitive time period<sup>10</sup>.

The untoward programming effect of a high early protein intake on later obesity risk has been linked to its effects on increasing plasma and tissue concentrations of insulinogenic amino acids, insulin and insulin-like growth factor 1 (IGF-1), which appear to induce a higher weight gain during the first 2 years of life as well as an enhanced adipogenic activity<sup>11</sup>. Such effects of an infant formula higher protein content on insulinogenic amino acids, insulin and IGF-1 levels have been shown in the double-blind randomized CHOP trial<sup>12-14</sup>.

Milk protein seems to play a key role in growth regulation during early childhood. Protein intake is the main contributor for nutritional regulation of the IGF-I axis<sup>15,16</sup>. Milk protein enhances serum IGF-1 to a greater extent than meat protein<sup>17</sup>. This might explain the more pronounced effect of milk protein compared to other proteins on the later risk of obesity that has been reported<sup>8</sup>.

Average protein intake of young children in Europe and other regions is much higher than metabolic requirements. During the second year of life, 30-50% of total daily protein is comprised of dairy products<sup>18,19</sup>, indicating particular opportunities to reduce overall protein consumption though modifying dairy protein intake.

Therefore, we designed a randomized controlled trial to examine the role of milk protein intake during the second year of life on child growth and later obesity risk. If a reduction of milk protein during the second year of life has an appreciable effect on growth and obesity development, respective dietary modification may be translated into the practice of toddler feeding.



## Main Objective

We aim at evaluating the effect of two iso-energetic milk products for young children with differing protein content on growth during the second year of life.

## Secondary Study Objectives

Besides treating the study as an intervention study as described in detail below, the study incorporates a longer follow-up and is also considered a cohort study. Data obtained and produced should be scientifically exploited for explorative analysis specifically addressing the interplay and factors that influence child feeding, growth and development, physical activity, metabolism, and disease prevention.

## Methods and analysis

### Study design and population

The Toddler Milk Intervention trial (ToMI trial) is designed as a two-arm, parallel, randomized, double blind controlled trial to evaluate toddler milk products with different protein content. The study is conducted at university hospitals in Munich, Germany, and in Tarragona and Reus, Spain.

The target population are healthy children at the age of one year. The children are enrolled if they meet the inclusion and exclusion criteria outlined in Table 1.

### Intervention

#### Formula composition

Two investigational formulas are used. Both formulas are based on cow's milk. The protein is unmodified from cow's milk and has the same casein:whey protein ratio in both formulas. The experimental formula contains 0.72g protein/100ml (1.5g/100 kcal), with a protein content that is similar to breast milk in advanced lactation. The control formula contains 2.95g protein/100ml (6.15g/100 kcal) which is comparable to standard 2% cows' milk. Contents of energy, carbohydrates, vitamins and minerals are very similar for both formulas (Table 2). In order to reach the same energy content in both formulas, the fat content varies between experimental (4.25g fat/100 kcal) and control formula (2.16g fat/100 kcal) but the lipid composition and the ratio of milk fat/vegetable oils is the same. Both formulas were developed and produced by the sponsor for this trial and were not tested in any other studies before the trial.

#### Dose, route of administration and schedule of formula

Participating families receive the formula as milk powder (one can comprises about 400g of product) and are advised to prepare the formula according to the instructions which were identical for all product codes. It is recommended to consume at least 300ml of formula per

1 day. Further, parents are encouraged to substitute with the study formula any milk intake from  
2 the child's diet. The intake of other dairy products such as cheese or yoghurt is accepted.  
3

4  
5 The intervention starts with the first study visit at around one year of age and ends with the  
6 third study visit at around two years of age. The study formula is given to the parents at no  
7 costs and is delivered directly to subject's home. Subject's compliance is regularly checked by  
8 telephone and personal interviews. After the end of the intervention, return and pick-up of  
9 remaining cans is organized. If not possible, families are advised to destroy remaining infant  
10 formula cans.  
11  
12  
13  
14

#### 15 Discontinuation criteria

16  
17 Discontinuation of the trial can be either due to withdrawal of consent at any time or due to  
18 the investigator's decision that continuation within the trial might impair child's health.  
19

#### 20 Outcome measurements

##### 21 Primary endpoint

22  
23 The primary endpoint is BMI-for-age z-score (based on the WHO Multicentre Growth  
24 Reference Study <sup>20</sup>) at the age of 24 months adjusted for BMI-for-age z-score at 12 months of  
25 age.  
26  
27  
28  
29

##### 30 Secondary objectives and endpoints

31  
32 The secondary objectives serve to evaluate the safety and efficacy of the two milk products used  
33 and to complement the primary endpoint. Secondary endpoints will also be adjusted for  
34 baseline measurements if available. Secondary endpoints are:  
35  
36

- 37 - BMI-for-age z-score at 72 months,
- 38 - The percentage of overweight and obese children at 24 months of age according to CDC  
39 definition: Overweight is at and above the 85th to less than 95th percentile and obese  
40 95th percentile or greater
- 41 - The percentage of overweight and obese children at 72 months of age,
- 42 - Anthropometric measures (z-scores for weight, length and head, waist and arm  
43 circumference at 12, 18, 24, 48 and 72 months of age; hip circumference at 48 and 72  
44 month of age),
- 45 - Subcutaneous fat distribution (from skinfold thickness at 24, 48 and 72 months of age),
- 46 - Total body fat and lean mass (from BodPod measurements at 24, 48 and 72 months of  
47 age),
- 48 - Blood pressure (48 and 72 month of age),
- 49 - Child development (24 and 48 months of age),
- 50
- 51
- 52
- 53
- 54
- 55
- 56
- 57
- 58
- 59
- 60

- Metabolic and endocrine markers (IGF-1, IGF-BP2, IGF-BP3, insulin, leptin, adiponectin, ghrelin, lipid profile and complete blood count at 12, 24 and 72 month of age),
- Serum albumin, urea, creatinine, amino acids at 12, 24, 72 months of age and ferritin and 25-OH-vitamin D (at 24 months of age),
- Metabolic profile (from plasma at 12, 24 and 72 months of age and from urine samples at 12, 18, 24, 48 and 72 months of age),
- Urine markers (Calcium, C-peptide, creatinine urea nitrogen at 12, 18, 24, 48 and 72 months of age),

Furthermore, the following hypotheses will be examined:

- Total energy intake is not affected by the low protein formula.
- Total protein intake is lower in the group of protein reduced formula.
- Plasma concentrations of essential amino acids and of IGF-1 at the age of 24 months are lower in the low protein formula group compared to the high protein formula group.
- Systolic and diastolic blood pressure measurements at the ages of 48 and 72 months are lower in the low protein formula group compared to the high protein formula group.
- Body fat mass at age 24 months is lower in the low protein formula group compared to the high protein formula group.
- DNA methylation affects the association of protein intake and BMI
- Protein intake affects DNA methylation
- DNA methylation affects the association of protein intake and the metabolic profile

DNA methylation is currently only planned as an option provided additional funding can be secured.

### Sample size

The sample size calculation is based on the observations from the CHOP-study<sup>1</sup>. This trial examined the difference in BMI-for-age z-scores between two groups of children fed a higher or lower protein content formula during the first year of life. At 24 months of age the BMI for age z-score difference between both formula groups was 0.2 standard deviations (SD). The absolute difference in protein content between intervention and control group in the CHOP-trial was lower (Infant formula: 0.8g/100ml; Follow-on formula: 1.6g/100ml) compared to the ToMI-trial (2.2g/100ml). Despite a higher protein difference, we expect a lower effect of the intervention due to the lower contribution of milk to the total protein intake in the second year of life. Thus, we assume a slightly lower mean difference in BMI for age z-score of 0.15 SD at 24 months of life.

The sample size was calculated with an anticipated effect size on BMI for age z-score of 0.15 SD and a standard deviation of 0.9. Assuming a power of 80 % and a significance level of 5%

(two-sided alpha of 0.05), a sample size of 566 subjects per intervention arm is calculated. Therefore, 1,132 subjects in total are needed. To have enough power to detect also a difference of the same magnitude at 72 months (6 years) of age, at an assumed loss to follow-up of 30%, a final sample size of 1,618 subjects was estimated.

### Recruitment

The study sites in Munich, Reus and Tarragona followed somewhat different recruitment strategies due to different local conditions. In Germany all inhabitants are registered in central registries. The public registries provided the study team for this defined research on a regular basis addresses of all families with children in the required age group (about 26,000 per year). These families living in Munich and about 70 surrounding municipalities were contacted once by postal mail and invited to contact the study team if interested in participation in the trial.

In Spain two recruitment strategies were used for both sites covering about 3000 births per year. First, telephone contacts from families who delivered their child at either of the two hospitals were available. These families were contacted directly. Second, recruitment interviews at primary health care centers were conducted. In these primary health care centers, Spanish children are seen for health care examinations and for vaccinations.

### Allocation of study formula and blinding

The study formula cans are labelled with one of eight codes. Four codes each are assigned to the intervention or the control group, respectively. The allocation of the codes is performed online by study staff after check of in- and exclusion criteria within the data capture tool (iMedidata, Medidata Balance, New York, USA) using balanced randomization stratified by country. After enrolment of the subject into the trial, study staff dispense the assigned study formula to the study participant along with instructions for formula preparation.

The study is double blinded with all persons involved in local organization and conduct of the study such as study staff, principal investigator, project manager, biostatistician, data manager, trial monitor and laboratory analysts being unaware of the code allocation. After the code break for the primary outcome analysis, subjects will receive a new identification id in the analysis data to hamper the unblinding for above persons in the further follow-up. An emergency code break by an Investigator may be requested only in case of an unexpected serious adverse event (SAE) suspected to be related to the investigational product.

### Data collection, management and analysis

#### Data collection and management

During the intervention period three visits at the hospital are scheduled at 12, 18 and 24 months of age (Figure 1). At baseline socioeconomic data and data on health, growth and nutrition by 24-hours recalls during the first year of life are assessed. At each visit

1 anthropometric measurements are performed and urine samples are collected. Blood is taken  
2 at 12 and 24 months of age. Additionally, at 24 months of age body composition using an air  
3 displacement plethysmography (BodPod COSMED, Rome, Italy) as well as physical activity  
4 measurement using an accelerometer device (Actigraph wGT3X-BT, Pensacola, FL, USA) is  
5 performed. Further, data of child's development based on parent answers of the Ages & Stages  
6 questionnaire (ASQ-3, Brookes Publishing Co., Inc., USA) are collected.  
7  
8  
9

10 For follow-up, two additional visits are scheduled at 48 and 72 months of age with  
11 anthropometric, body composition and physical activity measurements and collection of urine  
12 samples and food frequency questionnaires (Eating Habits Questionnaire -EHQ)<sup>21</sup>.  
13 Furthermore, socioeconomic data and data on health are updated and data on nutrition  
14 behavior is collected. At 48 months of age, the ASQ-3 is used again. Blood is taken at 72 months  
15 of age.  
16  
17  
18  
19  
20

21 The main primary aim of the nutritional assessment during the intervention phase is to see if  
22 the intervention groups differ in nutritional intake. Therefore, a 24h-recall is used. While the  
23 second year of life is still considered a nutritional transition period, nutrition patterns are more  
24 stable between 48 and 72 months of age and analysis of food patterns are more relevant.  
25 Therefore, a FFQ is used for the later time points.  
26  
27  
28  
29

30 During all study visits and at several additional telephone calls between visits, parents are  
31 asked for health problems (including adverse events) and compliance. For compliance the  
32 intake of study milk and any discontinuation of study milk intake with reasons are determined.  
33 The number of consumed cans will be used to determine the average study milk consumption.  
34  
35  
36

37 Collected data is organized in different databases. To organize and document all contacts with  
38 study participants and to coordinate the shipment of the study product, a web-based  
39 participant management tool is used (developed jointly with MedSciNet AB, Stockholm,  
40 Sweden). In this database, personal data is saved and stored on a secured data server. This  
41 database is separated from the other databases which store all medical, nutritional and  
42 laboratory data.  
43  
44  
45  
46

47 All collected health data are primarily captured on paper except data from questionnaires on  
48 physical activity and food frequency questionnaires that are entered by families using  
49 LimeSurvey (LimeSurvey GmbH, Hamburg, Germany). All other data are transferred from  
50 paper into web-based databases. Nutritional data from 24-hours recalls are entered into  
51 Nutritics (NUTRITICS LTD, Dublin, Ireland) with nutritional information from the German  
52 nutritional database BLS 3.02 and complemented with the nutritional composition from a  
53 variety of commercial infant foods and local foods, obtained directly from the label, producer  
54 websites or local food composition databases. All other data are entered into iMedidata (New  
55 York, USA).  
56  
57  
58  
59  
60

Laboratory samples are processed according to a laboratory SOP. In general, aliquots have 2D barcodes, are scanned, linked with the subject ID and stored into 96-well racks at -80°C for later analysis. Only blood count, lipid status and HbA1c are measured locally on the day of blood sampling.

To ensure data quality, study staff is trained in regular intervals, and procedures are harmonized among study centers by regular contact and monitoring. Furthermore, anthropometric measurements are performed at least twice and data entry is strictly checked for consistency and plausibility by the monitor. Standard operating procedures for all measurements are in place; anthropometric measurements are based on the WHO Growth Standards study<sup>20</sup>.

### Statistical methods

A statistical analysis plan is created before final code break for the analysis of primary and secondary outcomes. For the statistical analysis, the full analysis dataset (FAS) and the per-protocol-dataset (PP) will be considered. The FAS comprises all randomized subjects who consumed at least one can of investigational product and was considered reasonable and as close as possible to the intention to treat (ITT) ideal as we dealt with a healthy population that participated not for treatment reasons. The PP comprises all subjects included in the FAS and that were compliant with the aimed product consumption (mean consumption of the recommended daily minimum amount of investigational product of 300ml/d). Compliance will be primarily assessed by the number of tins used by the study subject. A Blind Data Review Meeting with participants of the sponsor and the investigators will define specific rules and definitions for lack of compliance. No imputation of missing values is foreseen.

The primary endpoint will be analyzed in the FAS by linear regression (ANCOVA) and corrected for BMI-for-age z-score at baseline, study center and gender. The results of the final model will be compared to further adjusted models and analysis in the PP group; possible effect modification of the primary outcome will be also considered.

Secondary analyses supporting primary objective:

1. BMI-for-age z-score at 72 months.
2. The percentage of overweight and obese children at 24 months of age according to CDC definition: Overweight at and above the 85th to less than 95th percentile and obese 95th percentile or greater.
3. The percentage of overweight and obese children at 72 months of age.

In order to control the experiment wise false positive rate, the listed hierarchy (primary – secondary endpoints) will be maintained in interpreting these outcomes. The incidence of overweight and obese children at 24 and 72 months of age shall be also estimated according to

1  
2 International Obesity Task Force IOTF definition <sup>22</sup>. The percentage of overweight and obese  
3 children will be analyzed by the method of O. Sauzet, et al. <sup>23</sup>.  
4

5 Secondary endpoints include anthropometric measures, dietary and biochemical data. We will  
6 use z-scores of WHO growth standards for anthropometry measures at months 12, 18, 24, and  
7 48. We will use a likelihood-ratio test to examine if there is a longitudinal treatment effect.  
8 Additionally, treatment differences at each visit will be analyzed using ANCOVA. The ANCOVA  
9 approach was chosen so that treatment differences and p-value do not depend on the stage of  
10 analysis. A further supportive analysis with a mixed linear model shall be performed at 6 years  
11 of age. Fixed effects shall be the intervention group, age, gender, and age times intervention  
12 group. The random effects shall be a random intercept and slope.  
13  
14  
15  
16  
17

18 Dietary data is collected by 24-hours recalls or food frequency questionnaires, which allow us  
19 to test for differences in macronutrient intake using ANCOVA. Hence, we are able to analyze if  
20 subjects change their dietary habits over time.  
21  
22

23 Biochemical data is often log-normal distributed. In order to analyze this kind of data properly,  
24 we will log-transform the data to achieve approximately normal distributed residuals.  
25  
26

## 27 Monitoring

### 28 Data monitoring

29 To ensure safety of the intervention, an interim analysis is planned when 260 subjects have  
30 completed the intervention (at 24 months of age). Non-inferiority for weight-for-age z-score  
31 has to be shown. This must be the case in both FAS and PP. A non-inferiority boundary for  
32 weight-for-age z-score of minus 0.5 SD was chosen according to Onyango et al. <sup>24</sup>. The same  
33 model as for the primary analysis is used. To demonstrate non-inferiority, the lower bound of  
34 the two-sided 95% confidence interval of the model based treatment difference must be larger  
35 than the non-inferiority margin.  
36  
37  
38  
39  
40  
41

42 If non-inferiority is shown, the study is continued as planned. Otherwise, a second stage  
43 interim analysis is performed including the first 390 subjects who have completed the  
44 intervention. Furthermore, the safety evaluation will consider endpoints including adverse  
45 events, anthropometry, laboratory data and protein intake. Based on the results of the interim  
46 analysis and in accordance with the charter of the Data Monitoring Committee, the DMC will  
47 recommend either continuing the study as planned or performing the second stage interim  
48 analysis. The DMC is independent and consists of expert clinicians and statisticians with no  
49 competing interest. The planned interim safety analysis took place in June 2018 and no safety  
50 concerns were detected.  
51  
52  
53  
54  
55  
56

57 Besides the interim analysis, safety is continuously observed by blinded online monitoring of  
58 individual growth curves based on the WHO growth charts. If a considerable number of  
59  
60

1 subjects drop below the median growth curve, an interim analysis will be initiated and the  
2 DMC will review unblinded data.  
3  
4

### 5 Harms

6 Any adverse events (AE) which lead to an untoward medical occurrence except for diagnostic  
7 and therapeutic non-invasive and invasive procedures will be recorded during the entire  
8 intervention period until 30 days after last study milk intake. After these 30 days, only AE's  
9 which are related to the intervention treatment will be recorded. Each AE will be rated  
10 according to its severity and its relationship to the study milk. Additionally, severe adverse  
11 events (SAE) which e.g. requires inpatient hospitalization will be reported to the safety  
12 manager within 24 hours after notice and will be followed up until the outcome is known. A  
13 participant insurance is in place.  
14  
15  
16  
17  
18  
19

### 20 Monitoring

21 A commercial monitoring company reviews the process, AE reporting, data capturing and  
22 corresponding source data on a regular basis to ensure protocol compliance, accuracy and  
23 completeness.  
24  
25  
26

### 27 Protocol versions

28 Issue date: 15.09.2020; version identifier: 5; number of protocol amendments: 5; initial  
29 version: 9 March 2016. First modification: 30 March 2016. Besides adaptation from requests  
30 of both ethical committees before the start of the study and several minor changes due to  
31 misspecifications in the protocol, several clarifications were needed, e.g. to provide more  
32 clarity and criteria for study termination before regular completion of the study, clarification  
33 in the statistical interpretation of secondary endpoints, addition of new secondary endpoints  
34 physical activity and HbA1c, the adaptation to the new European data protection rules in 2018,  
35 and a change in exclusion criteria to allow the inclusion of children that are breastfed once per  
36 day. Furthermore, an extensive specification of the safety interim analysis after inclusion of  
37 260 children was added in 2018 and more details for collection of AEs separating the collection  
38 into two periods, during and after the intervention, were provided.  
39  
40  
41  
42  
43  
44  
45  
46

### 47 Ethics and dissemination

#### 48 Ethical considerations

49 This study is conducted in compliance with the International Conference on Harmonization  
50 (ICH) guidelines and the Declaration of Helsinki and complies with Good Clinical Practice  
51 guidelines. Ethics approval was obtained from the ethical committees of the university  
52 hospitals at the Ludwig-Maximilian University in Munich, Germany (Projekt Nr. 555-15) and  
53 at the Institut d'Investigació Sanitaria Pere Virgili, Reus, Spain (Ref. CEIm IISPV 013/2016).  
54  
55  
56  
57  
58  
59  
60



1 All protocol amendments were and will be approved by the ethical committee prior to  
2 implementation.  
3

4  
5 Written informed consent is collected by study staff from all legal guardians prior to study  
6 inclusion in adherence with regulatory requirements. Each subject receives oral as well as  
7 written informed consent in plain language with adequate time in advance to make an  
8 informed decision about study participation. The latest informed consent form for both study  
9 sites is enclosed in the online supplementary (Supplementary file). All participants re-  
10 consented for any additional measurement added to the protocol.  
11  
12  
13  
14

### 15 Patient and Public Involvement

16  
17 The study protocol was primarily developed at a public university hospital without involvement  
18 of the sponsor. There was no further public or patient involvement.  
19

### 20 Public dissemination and data availability

21  
22 Study results will be published in peer-reviewed journals and presented on national and  
23 international conferences. Study results will also be communicated to participants. Results will  
24 be written-up and published by the investigators without help of professional writers.  
25 Authorship will depend on relevant contribution to the study. Investigators have full research  
26 freedom and have full access to all data. The full study protocol will be made available upon  
27 request. The participant-level dataset is not currently planned to be available because consent  
28 was not obtained for the sharing of such data from participant's parents / legal guardians or  
29 the Institutional Ethics Committees.  
30  
31  
32  
33  
34  
35

### 36 Trial status and time course of the trial

37  
38 The study started to recruit subjects in September 2016 and finished recruitment of 1,625  
39 children in October 2019. The intervention phase will last until October 2020. The database  
40 closure for the analysis of the primary outcome is planned for the first quarter of 2021. The  
41 follow-up will be completed around October 2025.  
42  
43  
44

### 45 Funding, role of the sponsor and investigators

46  
47 The sponsor has allocated a fixed budget for each study center to recruit and follow the  
48 subjects. The sponsor is producing the study product and distributes the study product to the  
49 study subjects. The sponsor is funding the monitoring of the study. The primary protocol was  
50 outlined by the investigators and was jointly further developed by investigators and sponsor.  
51 Data management will be primarily done by the sponsor, except parts of the compliance  
52 checks, checks of biosamples and body composition data, as well as nutritional and physical  
53 activity data. The primary analysis will be performed by the sponsor. The investigators have to  
54 approve the statistical analysis plan and will have full access to all the data. Any published  
55 interpretation of the data has to be in mutual agreement between sponsor and investigator  
56  
57  
58  
59  
60

1  
2 without hampering the research freedom of the investigators. The urinary metabolic profile  
3 will be performed by the sponsor, all other laboratory measurements by the investigators. BK  
4 is the coordinating principal investigator with VG being his deputy, JE is principal investigator  
5 in Spain.  
6  
7  
8  
9  
10  
11  
12  
13  
14  
15  
16  
17  
18  
19  
20  
21  
22  
23  
24  
25  
26  
27  
28  
29  
30  
31  
32  
33  
34  
35  
36  
37  
38  
39  
40  
41  
42  
43  
44  
45  
46  
47  
48  
49  
50  
51  
52  
53  
54  
55  
56  
57  
58  
59  
60

For peer review only

## References

1. Koletzko B, von Kries R, Closa R, et al. Lower protein in infant formula is associated with lower weight up to age 2 y: a randomized clinical trial. *Am J Clin Nutr* 2009;89(6):1836-45. doi: 10.3945/ajcn.2008.27091
2. Weber M, Grote V, Closa-Monasterolo R, et al. Lower protein content in infant formula reduces BMI and obesity risk at school age: follow-up of a randomized trial. *Am J Clin Nutr* 2014;99(5):1041-51. doi: 10.3945/ajcn.113.064071
3. Koletzko B, Demmelmair H, Grote V, et al. Optimized protein intakes in term infants support physiological growth and promote long-term health. *Semin Perinatol* 2019;43(7):1511-153. doi: 10.1053/j.semperi.2019.06.001
4. European Commission. COMMISSION DELEGATED REGULATION (EU) 2016/128 of 25 September 2015 supplementing Regulation (EU) No 609/2013 of the European Parliament and of the Council as regards the specific compositional and information requirements for food for special medical purposes. *Official Journal of the European Union* 2016;L25/30 doi: [http://data.europa.eu/eli/reg\\_del/2016/128/oj](http://data.europa.eu/eli/reg_del/2016/128/oj)
5. Parizkova J, Rolland-Cachera MF. High proteins early in life as a predisposition for later obesity and further health risks. *Nutrition* 1997;13(9):818-9.
6. Karaolis-Danckert N, Gunther AL, Kroke A, et al. How early dietary factors modify the effect of rapid weight gain in infancy on subsequent body-composition development in term children whose birth weight was appropriate for gestational age. *Am J Clin Nutr* 2007;86(6):1700-08. doi: 10.1093/ajcn/86/6/1700 [pii] [published Online First: 2007/12/11]
7. Gunther AL, Buyken AE, Kroke A. Protein intake during the period of complementary feeding and early childhood and the association with body mass index and percentage body fat at 7 y of age. *Am J Clin Nutr* 2007;85(6):1626-33.
8. Günther ALB, Remer T, Kroke A, et al. Early protein intake and later obesity risk: which protein sources at which time points throughout infancy and childhood are important for body mass index and body fat percentage at 7 y of age? *Am J Clin Nutr* 2007;86(6):1765-72.
9. Ohlund I, Hernell O, Hornell A, et al. BMI at 4 years of age is associated with previous and current protein intake and with paternal BMI. *Eur J Clin Nutr* 2010;64(2):138-45. doi: 10.1038/ejcn.2009.132 [published Online First: 2009/11/12]
10. Hornell A, Lagstrom H, Lande B, et al. Protein intake from 0 to 18 years of age and its relation to health: a systematic literature review for the 5th Nordic Nutrition Recommendations. *Food Nutr Res* 2013;57 doi: 10.3402/fnr.v57i0.21083 [published Online First: 2013/05/30]
11. Koletzko B, von Kries R, Closa Monasterolo R, et al. Infant feeding and later obesity risk. In: Koletzko B, Desci T, Molnár D, et al., eds. *Early Nutrition Programming and Health Outcomes in Later Life*. Houten, Netherlands: Springer Netherlands 2009:15-29.
12. Rzehak P, Grote V, Lattka E, et al. Associations of IGF-1 gene variants and milk protein intake with IGF-I concentrations in infants at age 6 months — Results from a randomized clinical trial. *Growth Horm IGF Res* 2013;23(5):149-58. doi: 10.1016/j.ghir.2013.05.002 [published Online First: 2013/06/27]
13. Socha P, Grote V, Gruszfeld D, et al. Milk protein intake, the metabolic-endocrine response, and growth in infancy: data from a randomized clinical trial. *Am J Clin Nutr* 2011;94(6 Suppl):1776S-84S. doi: 10.3945/ajcn.110.000596 [published Online First: 2011/08/19]
14. Kirchberg FF, Harder U, Weber M, et al. Dietary protein intake affects amino acid and acylcarnitine metabolism in infants aged 6 months. *J Clin Endocrinol Metab* 2015;100(1):149-58. doi: 10.1210/jc.2014-3157
15. Ketelslegers JM, Maiter D, Maes M, et al. Nutritional regulation of insulin-like growth factor-I. *Metabolism: Clinical and Experimental* 1995;44(10 Suppl 4):50-7. [published Online First: 1995/10/01]
16. Thissen JP, Ketelslegers JM, Underwood LE. Nutritional regulation of the insulin-like growth factors. *Endocr Rev* 1994;15(1):80-101. doi: 10.1210/edrv-15-1-80 [published Online First: 1994/02/01]

17. Hoppe C, Molgaard C, Dalum C, et al. Differential effects of casein versus whey on fasting plasma levels of insulin, IGF-1 and IGF-1/IGFBP-3: results from a randomized 7-day supplementation study in prepubertal boys. *Eur J Clin Nutr* 2009;63(9):1076-83. doi: 10.1038/ejcn.2009.34 [published Online First: 2009/05/28]
18. Hilbig A, Kersting M. Effects of age and time on energy and macronutrient intake in German infants and young children: results of the DONALD study. *J Pediatr Gastroenterol Nutr* 2006;43(4):518-24. doi: 10.1097/01.mpg.0000229548.69702.aa [published Online First: 2006/10/13]
19. Damianidi L, Gruszfeld D, Verduci E, et al. Protein intakes and their nutritional sources during the first 2 years of life: secondary data evaluation from the European Childhood Obesity Project. *Eur J Clin Nutr* 2016;70(11):1291-97. doi: 10.1038/ejcn.2016.108
20. de Onis M, Onyango AW, Van den Broeck J, et al. Measurement and standardization protocols for anthropometry used in the construction of a new international growth reference. *Food Nutr Bull* 2004;25(1 Suppl):S27-36.
21. Pala V, Reisch LA, Lissner L. Dietary Behaviour in Children, Adolescents and Families: The Eating Habits Questionnaire (EHQ). In: Bammann K, Lissner L, Pigeot I, et al., eds. *Instruments for Health Surveys in Children and Adolescents*. Cham: Springer Nature Switzerland 2019:103-33.
22. Cole TJ. Establishing a standard definition for child overweight and obesity worldwide: international survey. *BMJ* 2000;320(7244):1240-40. doi: 10.1136/bmj.320.7244.1240
23. Sauzet O, Rehse J, Breiding JH. DistdichoR a R Package for the distributional dichotomisation of continuous outcomes arXiv:1809.03279, 2018.
24. Onyango AW, de Onis M, Caroli M, et al. Field-testing the WHO child growth standards in four countries. *J Nutr* 2007;137(1):149-52. doi: 10.1093/jn/137.1.149 [published Online First: 2006/12/22]

### Authors' Statement

VG and VJ wrote the manuscript. VG and BK provided the original outline of the protocol; JE, MZ, MG, and DG participated in the design and set-up of the study. BK, JE, MZ, MG, and DG critically revised the content of the manuscript.

### Funding statement

This study is sponsored by Soci t  de Produits Nestl  S.A., Switzerland (Avenue Nestl  55, CH-1800 Vevey) – formerly named Nestec. The work of VG, VJ and BK is/was financially supported in part by the European Commission H2020 Programme Lifecycle-733206, the European Joint Programming Initiative Project NutriPROGRAM, the German Ministry of Education and Research, Berlin (Grant Nr. 01 GI 0825), the German Research Council (Ko912/12-1 and INST 409/224-1 FUGG).

### Conflict of interest

The institutions of VG, VJ, BK, JE, MZ, MG receive funding by the sponsor to conduct the study- and DG is employed by the sponsor of the study.

## Tables

Table 1: Inclusion and Exclusion criteria of the Tomi trial

| Inclusion criteria                                                                                                                                                                                                                                                                                                                                                                                                                                                                                                                                                                                                                                                                                                                                                     | Exclusion criteria                                                                                                                                                                                                                                                                                                                                                                                                                                                                                                                                                       |
|------------------------------------------------------------------------------------------------------------------------------------------------------------------------------------------------------------------------------------------------------------------------------------------------------------------------------------------------------------------------------------------------------------------------------------------------------------------------------------------------------------------------------------------------------------------------------------------------------------------------------------------------------------------------------------------------------------------------------------------------------------------------|--------------------------------------------------------------------------------------------------------------------------------------------------------------------------------------------------------------------------------------------------------------------------------------------------------------------------------------------------------------------------------------------------------------------------------------------------------------------------------------------------------------------------------------------------------------------------|
| <ul style="list-style-type: none"> <li>• Legal guardians signed the written informed consent.</li> <li>• Child was born full term (<math>\geq 37 + 0</math> weeks of gestation).</li> <li>• Child's birth weight is between 2.5 and 4.5 kg.</li> <li>• Child is born from a singleton pregnancy.</li> <li>• Child's age at enrolment is between 11.5 and 13.5 month.</li> <li>• Child's legal guardians are of legal age and they have sufficient local language skills to understand the study information, informed consent and study procedure.</li> <li>• Child and child's parents are willing to fulfil the requirements of the study protocol and procedures.</li> <li>• Child's family is available via phone or e-mail throughout the whole study.</li> </ul> | <ul style="list-style-type: none"> <li>• Infant who is breastfed at least twice in 24 hours at time of enrolment.</li> <li>• Infant who usually does not drink 300 ml of cow's milk and/or formula milk per day.</li> <li>• Cow's milk allergy.</li> <li>• Lactose intolerance.</li> <li>• Institutionalized children.</li> <li>• Diagnosed disorder, which interfere with nutrition or growth (e.g. celiac disease, inflammatory bowel disease).</li> <li>• Children who participated in any other interventional clinical trial 4 weeks prior to enrolment.</li> </ul> |

Table 2: Nutritional composition of the interventional products (toddler milks) that are based on cow's milk with the same casein:whey protein ratio.

|                       | <b>Experimental toddler milk</b><br>(as prepared, per 100ml) | <b>Control toddler milk</b><br>(as prepared, per 100ml) |
|-----------------------|--------------------------------------------------------------|---------------------------------------------------------|
| Energy                | 201 KJ/48 kcal                                               | 201 KJ/48 kcal                                          |
| Protein               | 0.72 g                                                       | 2.95 g                                                  |
| Fat                   | 2.0 g                                                        | 1.0 g                                                   |
| Saturated fatty acids | 0.8 g                                                        | 0.4 g                                                   |
| Carbohydrates         | 6.7 g                                                        | 6.7 g                                                   |
| Lactose               | 6.7 g                                                        | 6.6 g                                                   |
| Other                 | <0.1 g                                                       | <0.1 g                                                  |
| Salt                  | 0.1 g                                                        | 0.1 g                                                   |
| Vitamines             |                                                              |                                                         |
| Vitamine A            | 71 µg                                                        | 66 µg                                                   |
| Vitamine D            | 1.2 µg                                                       | 1.3 µg                                                  |
| Folic acid            | 14.9 µg                                                      | 14.2 µg                                                 |
| Vitamine B12          | 0.2 µg                                                       | 0.2 µg                                                  |
| Vitamine C            | 6.4 mg                                                       | 6.9 mg                                                  |
| Minerals              |                                                              |                                                         |
| Calcium               | 115 mg                                                       | 115 mg                                                  |
| Micronutrients        |                                                              |                                                         |
| Iron                  | 0.5 mg                                                       | 0.5 mg                                                  |
| Zinc                  | 0.3 mg                                                       | 0.6 mg                                                  |

1  
2  
3  
4  
5  
6  
7  
8  
9  
10  
11  
12  
13  
14  
15  
16  
17  
18  
19  
20  
21  
22  
23  
24  
25  
26  
27  
28  
29  
30  
31  
32  
33  
34  
35  
36  
37  
38  
39  
40  
41  
42  
43  
44  
45  
46  
47  
48  
49  
50  
51  
52  
53  
54  
55  
56  
57  
58  
59  
60

*Figure 1: Assessments in children participating in the ToMI trial*

For peer review only

1  
2  
3  
4  
5  
6  
7  
8  
9  
10  
11  
12  
13  
14  
15  
16  
17  
18  
19  
20  
21  
22  
23  
24  
25  
26  
27  
28  
29  
30  
31  
32  
33  
34  
35  
36  
37  
38  
39  
40  
41  
42  
43  
44  
45  
46  
47  
48  
49  
50  
51  
52  
53  
54  
55  
56  
57  
58  
59  
60

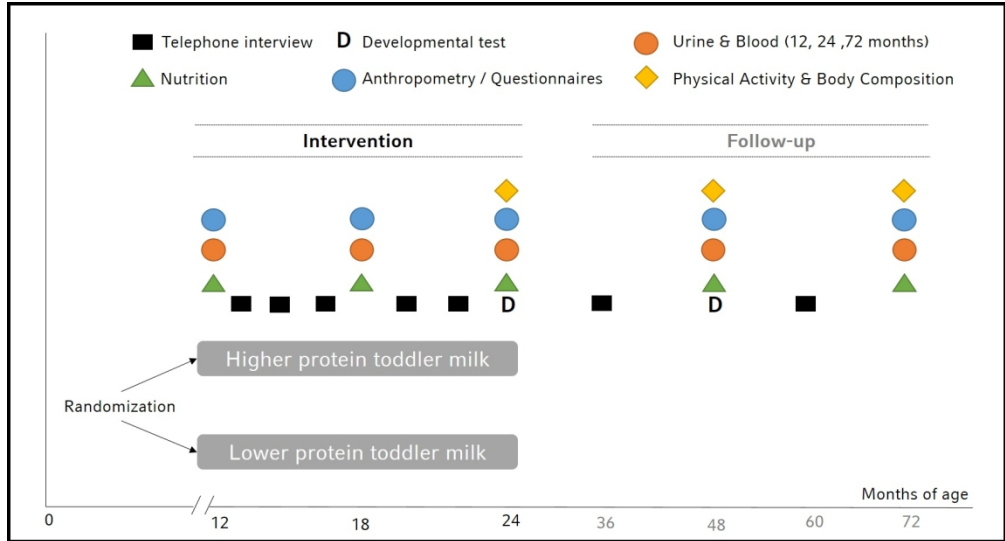

Assessments in children participating in the ToMI trial



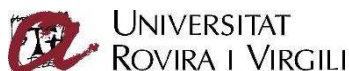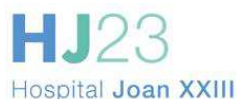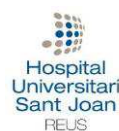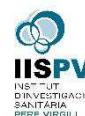

## INFORMACIÓN A LOS PARTICIPANTES

|                 |                                                                                                                                                  |
|-----------------|--------------------------------------------------------------------------------------------------------------------------------------------------|
| <b>TÍTULO</b>   | Efecto de la ingesta de proteínas lácteas en el niño pequeño sobre el crecimiento y el posterior riesgo de obesidad: ensayo clínico aleatorizado |
| <b>ACRÓNIMO</b> | <b>TOMI Trial</b>                                                                                                                                |

### INVESTIGADORES PRINCIPALES:

Ricardo Closa Monasterolo. Jefe del Servicio de Pediatría. Hospital Universitari de Tarragona Joan 23

Joaquín Escribano Subías. Jefe del Servicio de Pediatría. Hospital Universitari Sant Joan de Reus

**INTRODUCCIÓN:** Este documento es informativo sobre el proyecto de investigación que se indica en la cabecera, al cual les invitamos a participar. Les anticipamos que su participación es voluntaria y podrán realizar todas las preguntas que deseen, así como cambiar de opinión sobre su participación en cualquier momento. Su decisión no afectará la calidad de la atención sanitaria que reciba su hijo/a.

**OBJETIVO:** Este proyecto tiene como objetivo evaluar el efecto de dos fórmulas lácteas de crecimiento (con las mismas calorías, pero con diferente proporción de proteína y grasa) durante el segundo año de vida sobre el crecimiento desde el año hasta los 6 años.

**INTERVENCIÓN NUTRICIONAL:** Los niños/as de las familias que deseen participar recibirán de forma gratuita una de las dos leches de crecimiento del estudio durante todo el segundo año de vida (50% de probabilidad para cada una). Estas dos leches tendrán el mismo contenido energético (48 Kcal/100 ml) (calorías similares a la leche de vaca semidesnatada) y se diferenciarán en las proporciones de proteínas y grasas. Una de las leches tendrá 2.95g de proteínas y 1.1g de grasas (en 100ml), mientras que la otra tendrá 0.72g de proteínas y 2.11g de grasas (en 100ml). Estas proporciones se encuentran comprendidas entre las proporciones contenidas en la leche materna y la leche de vaca de consumo habitual. En ningún momento del estudio, ni los investigadores ni las familias conocerán cuál de estas leches consume cada participante.

**METODOLOGÍA:** En este estudio participaran unos 1618 niños de Múnich (Alemania) y Reus/Tarragona. La participación en el estudio tiene una duración de 5 años. Los participantes recibirán una de las dos leches de crecimiento desde el año hasta los 2 años de vida y se evaluará su crecimiento, desarrollo y estado nutricional y de salud a las siguientes edades: 1 año, 1.5 años, 2, 4 y 6 años (en total 5 visitas a lo largo de 5 años). La recogida de datos se llevará a cabo mediante las siguientes evaluaciones y procedimientos en diferentes momentos del seguimiento (que se detallan en la Tabla 1):

- Cuestionarios de salud completados por los padres (o persona a cargo del niño/a)
- Entrevistas telefónicas breves con el equipo de investigación (para revisar la alimentación)
- Exámenes (siempre voluntarios) realizados al niño/a, como:
  - Valoración del crecimiento y la composición corporal a través de medidas antropométricas.
  - Valoración de la composición corporal a través de desplazamiento de aire (se realiza sentado durante pocos minutos en una cámara cerrada llamada "BodPod").
  - Tensión arterial (a los 4 y 6 años).
  - Actividad física a los 2, 4 y 6 años: la evaluación de la actividad física se realizará mediante cuestionarios específicos, completados por los padres (o persona a cargo del niño/a) y medida a

1  
2 través de un monitor de actividad física o acelerómetro (Actigraph). El Actigraph es un monitor de  
3 actividad física (tipo acelerómetro) que consiste en un pequeño equipamiento médico (peso  
4 aproximado: 20gr) que se lleva en la cintura o cadera con un cinturón. Este equipamiento mide la  
5 actividad física, el sueño y el gasto energético. El procedimiento consiste en llevar el dispositivo  
6 unos 5-7 días para medir la actividad diurna (no hace falta llevarlo por la noche). Después, el  
7 dispositivo se retorna al personal del estudio para que extraigan de él los datos.

- 8
- 9
- 10 ○ Análisis de sangre: la extracción de sangre será realizada por personal cualificado a los 1, 2 y 6 años.
- 11 ○ Análisis de orina: los padres o cuidadores recogerán varias muestras de orina al participante a lo
- 12 largo del estudio; esta recogida se efectuará mediante una bolsita para lactantes o mediante un
- 13 tubo convencional de recogida de orina (material que les proporcionará de forma gratuita el equipo
- 14 investigador) y se entregará en el momento de la visita.
- 15

16 **CIRCUNSTANCIAS EN LAS CUALES LA PARTICIPACIÓN DEL SUJETO SE CONSIDERA FINALIZADA:** En caso que  
17 el participante lo comunique o deje de acudir a las visitas. Mientras el participante no comunique su  
18 decisión de dejar de participar, el equipo de investigación seguirá invitándolo a asistir a las visitas.  
19 Asimismo, los participantes que no deseen continuar participando en el estudio o que no puedan seguir  
20 consumiendo el producto de estudio, serán invitados a acudir a una última visita a los 2 o 6 años.

21 **EFFECTOS ADVERSOS:** Basados en investigaciones previas, no se espera ningún efecto indeseable por el  
22 consumo de la leche de estudio. En cualquier caso, dispondrán de teléfonos de contacto para notificar  
23 cualquier incidencia o realizarnos cualquier pregunta. Así mismo, si su hijo/a ha de ser ingresado/a en algún  
24 momento por cualquier motivo, rogamos nos lo hagan saber.

25 **RIESGOS:** El estudio no supone **ningún riesgo** que no sea el derivado de una extracción sanguínea. Las  
26 extracciones de sangre son analíticas normales, que realizará una enfermera con gran experiencia, y  
27 pueden causar las molestias propias de un pinchazo. La valoración del volumen corporal a través del  
28 desplazamiento de aire es una técnica totalmente segura que no provoca ninguna molestia. El uso del  
29 monitor para medir la actividad física no conlleva ningún riesgo. El dispositivo cumple con todos los  
30 requisitos de la Unión Europea por lo que respecta a dispositivos médicos de Clase I. En todo momento se  
31 tomarán precauciones para evitar al máximo cualquier inconveniente.

32 De todas formas, pueden seguir participando en el estudio, aunque decidan no realizar alguno de los  
33 exámenes anteriormente descritos.

34 **BENEFICIOS:** Aunque este proyecto no les promete ninguna ventaja directa, ustedes contribuirán a un  
35 mejor conocimiento de la importancia de la alimentación infantil sobre la obesidad infantil y el riesgo de  
36 padecer enfermedades cardiovasculares y posiblemente su participación servirá de ayuda a otras personas  
37 con estos problemas en el futuro.

## 38 **DERECHOS DE LOS PARTICIPANTES**

39 **USO DE LAS MUESTRAS BIOLÓGICAS:** Servirán para llevar a cabo determinaciones bioquímicas,  
40 metabólicas, epigenéticas y genéticas relacionadas con el objetivo del estudio (la obesidad y las  
41 enfermedades cardiovasculares). En primer lugar, se analizarán parámetros del estado nutricional general,  
42 los resultados de los cuales serán comunicados a las familias.

43 Una parte de las muestras de sangre y las muestras de orina serán enviadas anonimizadas a los laboratorios  
44 centrales del proyecto en Múnich (Labor für Stoffwechsel & Ernährung, Hauner Childrens Hospital y  
45 Laboratoriumsmedizin, KUM). Otras muestras codificadas pueden ser enviadas a Nestec, en Suiza, o a sus  
46 filiales o a terceros para hacer otros análisis. Usted puede decidir restringir el uso de estas muestras para  
47

1  
2 que no se lleven a cabo análisis genéticos (genes relacionados con la obesidad) indicándolo en la hoja de  
3 consentimiento.

4 Debido a la constante evolución del conocimiento y de las técnicas de investigación en esta área de la  
5 salud, es posible que en el futuro pueda realizarse una investigación complementaria relacionada con el  
6 objetivo del estudio. Por ello, los posibles sobrantes de las muestras de sangre y orina se preservarán en las  
7 mismas condiciones de anonimato y confidencialidad, y en un plazo máximo de 10 años serán destruidas.  
8 Ustedes pueden restringir la preservación de estas muestras indicándolo en la hoja de consentimiento. El  
9 tratamiento y uso de las muestras se realizará siguiendo lo especificado en la Ley de Investigación  
10 Biomédica (14/2007), y en el RD 1716/2011.  
11  
12  
13

14 **PROCEDIMIENTOS NO PLANIFICADOS:** Debido a la constante evolución del conocimiento científico y las  
15 técnicas, el promotor y sus colaboradores pueden desarrollar análisis no planificados relacionados con los  
16 objetivos de este ensayo y/o relacionados con investigaciones futuras en el campo de la salud y/o nutrición.  
17 Si ustedes consintieran, las muestras biológicas sobrantes (sangre y orina) o los datos, serán almacenados  
18 bajo las mismas condiciones de anonimato y confidencialidad para poder ser reutilizadas en análisis  
19 complementarios y/o futuras investigaciones científicas (siempre relacionadas con la asociación entre la  
20 alimentación infantil, el crecimiento y la salud). Si ustedes reusan, las muestras de su hijo/a serán  
21 almacenadas por un periodo máximo de 2 años y serán destruidas una vez el estudio y sus análisis estén  
22 terminados. Tienen el derecho de limitar el tiempo de retención y uso de estas muestras indicándolo en  
23 este consentimiento informado. Si aceptan el uso posterior de los datos y/o las muestras no planificadas en  
24 el protocolo inicialmente, serán informados y se les pedirá que den su consentimiento para estos análisis  
25 adicionales.  
26  
27  
28  
29

30  
31 **DEFINICIÓN DE DATOS PERSONALES:** Datos personales son toda información que se relacione con una  
32 persona identificada o identificable. Una persona identificada o identificable es una persona natural que se  
33 puede identificar, directa o indirectamente, en particular a través de un identificador como por ejemplo un  
34 nombre o un código.  
35

36 **CONFIDENCIALIDAD:** Para este estudio, las muestras biológicas obtenidas, así como toda la información  
37 recogida se codificarán con un número de forma que no aparezca ni su nombre ni su número de historia  
38 clínica. Únicamente los miembros del equipo de investigación tendrán acceso a sus datos y únicamente  
39 ellos podrían ponerse en contacto con ustedes y relacionar sus datos personales con los datos de salud  
40 recogidos. Para garantizar la calidad y seguridad del estudio, podrán supervisar la recogida de datos de  
41 salud: el monitor de calidad, las autoridades sanitarias, un representante autorizado de Nestlé y el Comité  
42 Ético de Investigación Clínica.  
43

44 Se garantiza que todos los datos y resultados obtenidos serán **absolutamente confidenciales** y que se  
45 utilizarán los mecanismos necesarios para el cumplimiento de la "Ley orgánica 15/1999, del 13 de  
46 Diciembre" para la protección de datos personales, y la "Ley 14/2007 de Investigación Biomédica". El  
47 equipo de investigación de la *Unitat de Pediatria de la Facultat de Medicina de la Universitat Rovira i Virgili*  
48 será responsable de sus datos y muestras. El equipo de investigación garantiza su confidencialidad y el  
49 hecho que las muestras y los resultados sean utilizados únicamente para las finalidades consentidas. El  
50 responsable de sus datos personales codificados (estos datos no contienen ningún nombre o dirección suya  
51 o de su familia) es Nestec Ltd., con domicilio en Avenue Nestlé 55, CH-1800, Vevey, en Suiza. Los  
52 participantes tienen derecho a acceder, cambiar y oponerse al uso de sus datos, en cualquier momento,  
53 simplemente contactando con un investigador (derechos otorgados por Ley 15/1999). Tengan en cuenta  
54 que tienen además los derechos de ver y acceder a sus datos, de borrarlos, limitar su procesamiento o la  
55 transferencia, presentar una objeción al tratamiento en las circunstancias y los términos especificados en la  
56 normativa anterior (derecho concedido por la Ley 15/1999 y 18/2018 Coll., sobre protección de datos de  
57  
58  
59  
60

1  
2 carácter personal y Reglamento UE 2016/679 del Parlamento Europeo y del Consejo de 27 de abril de  
3 2016). No obstante, el promotor se reserva el derecho de no borrar los datos recogidos antes de retirar su  
4 consentimiento y que ya se hayan analizado como parte del estudio. Tienen el derecho de solicitar  
5 información sobre los datos del estudio recogidos por los doctores del mismo o por el promotor y sus  
6 afiliados (o representantes). Si desean ejercer estos derechos, o presentar una reclamación o solicitar la  
7 corrección de cualquier inexactitud de estos datos, pónganse en contacto con el médico del estudio o con  
8 el agente de protección de datos del Centro (*Unitat de Recerca en Pediatria i Desenvolupament Humà*. Sant  
9 Llorenç 21. 43201 Reus. Telf.977 759364 o 977 759365).

10  
11  
12  
13 Si decidiesen retirar su consentimiento, solo deberán comunicarlo a los investigadores, en tal caso, no se  
14 incorporarán más datos a la base de datos y, si lo desean, también pueden solicitar por escrito la  
15 destrucción de sus muestras biológicas. Toda la información recogida en las visitas y exploraciones  
16 complementarias se codifica como el resto de muestras y datos del estudio TOMI con un número de forma  
17 que aparezca ni su nombre ni su número de historia clínica.

18  
19  
20  
21 **TRANSFERENCIA DE DATOS:** Los datos del estudio recogidos de su hijo/a serán enviados al promotor, a  
22 terceros que trabajen para el promotor y a las autoridades reguladoras si así lo reclamaran. Solamente  
23 datos codificados se almacenarán mediante un sistema informático seguro que pertenece a Medidata,  
24 empresa ubicada en todo el mundo, un tercero de Nestlé. El acceso al sistema web está restringido al  
25 personal del estudio y a los representantes del promotor. El promotor también podrá utilizar los datos del  
26 estudio para poder comercializar la fórmula del ensayo en algunos países o para publicarlos. No obstante,  
27 nada que pueda revelar su identidad ni la de su hijo/a saldrá fuera del centro.

28  
29  
30 Sus datos codificados y los de su hijo/a serán transferidos y procesados a países distintos de España, en  
31 condiciones que garanticen su confidencialidad, desde el centro a Nestlé Suiza y otros  
32 países/organizaciones internacionales que actúen en nombre del promotor. Como responsable de los  
33 datos, Nestlé ha tomado medidas contractuales, organizativas y de seguridad que aseguren el  
34 mantenimiento del nivel de protección adecuado exigido por las leyes europeas y españolas, sea cual sea la  
35 tercera parte del estudio o los países a los que se transfieran los datos. Durante estos procedimientos no se  
36 divulgará su identidad ni la de su hijo/a.

37  
38  
39 **VOLUNTARIEDAD:** Su participación en este estudio es totalmente **voluntaria**; pueden decidir no participar,  
40 o cambiar su decisión y denegar su consentimiento en cualquier momento, hecho que no afectará ni  
41 perjudicará la relación con su médico ni su atención. Para ello, únicamente deberán comunicarlo al equipo  
42 de investigación.

43  
44  
45 **INFORMACIÓN SOBRE EL ESTUDIO:** Si se dispusiera de nueva información sobre el producto en estudio que  
46 pueda influir en su decisión de continuar en el mismo, se les informará de manera oportuna. En el caso de  
47 que estas investigaciones proporcionen datos que pudieran ser clínica o genéticamente relevantes para  
48 ustedes e interesar a su salud o a la de su familia, les serán comunicados salvo que indiquen expresamente  
49 que no desean recibir esta información. Aunque no deseen recibir esta información, tengan en cuenta que  
50 la ley establece que, cuando la información obtenida sea necesaria para evitar un grave perjuicio para la  
51 salud de sus familiares biológicos, un comité de expertos estudiará el caso y decidirá si es conveniente  
52 informar a los afectados o a sus representantes legales. Si por alguna razón ustedes quisieran conocer los  
53 resultados de las investigaciones que se hayan producido como consecuencia de su colaboración, podrán  
54 ponerse en contacto con los responsables del proyecto, que les informarán debidamente.

55  
56  
57 **COMPENSACIÓN:** Ustedes no recibirán incentivos económicos para participar en el estudio, pero recibirán  
58 una compensación que minimice el coste de tiempo y desplazamiento por acudir a la visita.

**FONDO DE FINANCIACIÓN:** Este estudio recibe soporte económico de Nestec Ltd., Avenue Nestlé 55 CH-1800 Vevey, Switzerland. Esta compañía es tomadora de un **seguro de responsabilidad** (contratado con la compañía Zurich Insurance plc., con nº de póliza Z140955 para el Hospital Universitari de Tarragona Joan XXIII y Z140963 para el Hospital Universitari Sant Joan de Reus) por cualquier posible consecuencia negativa sobre los participantes del estudio por su participación en el estudio. El promotor tiene la potestad de terminar el estudio en cualquier momento.

**OTROS ASPECTOS REGULATORIOS:** Este estudio ha sido aprobado por los Comités Éticos de Investigación Clínica del Institut d'Investigació Sanitària Pere Virgili y el de la Fundació Jordi Gol i Gorina. El estudio ha sido diseñado de acuerdo a la Declaración de Helsinki, que establece los criterios de investigación biomédica en personas de forma ética.

Por favor, vean a continuación un esquema (Figura) en que se detallan todas las pruebas previstas en cada momento del seguimiento y ¡hagan todas las preguntas y comentarios que deseen!

Figura. Valoraciones que se realizan a los participantes durante el estudio

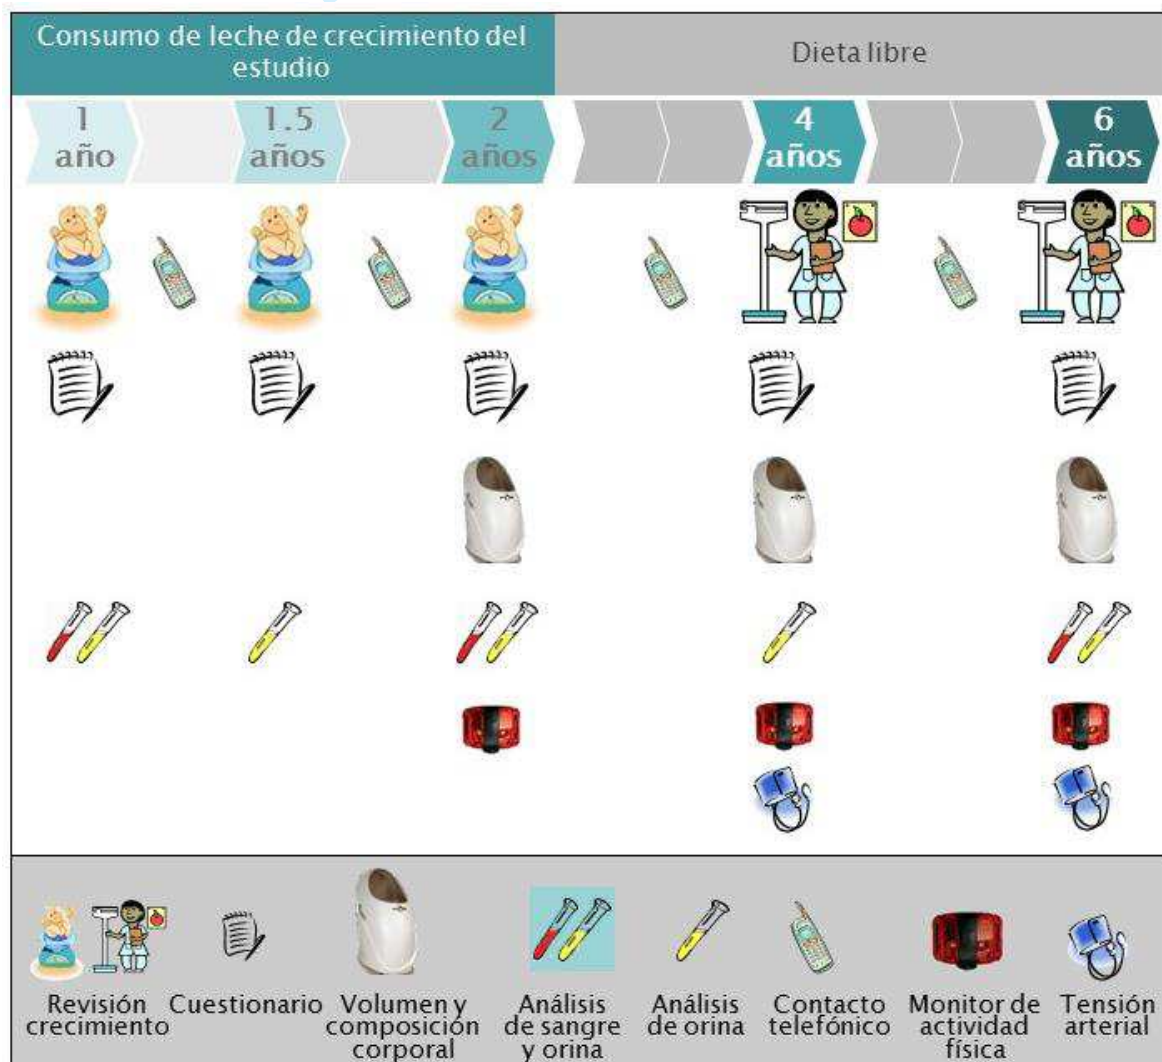

### INFORMACIÓN DE CONTACTO

Unitat de Pediatria, Facultat de Medicina. Universitat Rovira i Virgili. C/ Sant Llorenç 21, 43201 Reus.

Teléfonos: 977759365 / 977759364/ 619733840 (Tarragona)/ 616891314 (Reus)

(Copia para el participante)

**CONSENTIMIENTO INFORMADO**

Sr./Sra. .... informa al padre/madre  
Sr./Sra. .... en relación al estudio  
TOMI.

He sido informado/a sobre los derechos de mi hijo/a y los posibles riesgos y beneficios de su participación en el proyecto:

- La participación de mi hijo/a en este estudio es voluntaria.
- Se garantiza que los derechos y atención sanitaria de mi hijo/a no se verán influenciados por mi decisión.
- Los resultados relevantes que se obtengan a través de este proyecto podrán ser publicados, pero mis datos personales nunca serán revelados a no ser que lo requiera la ley.
- En el caso de que tenga cualquier duda o problema relacionado con el estudio, puedo contactar con Dr. Ricardo Closa, Dr. Joaquín Escribano, Dra. Natalia Ferré y Dra. Verónica Luque a través de los teléfonos 977759364, 977759365, 619733840 (Tarragona), 616891314 (Reus).
- Me ha sido entregada la hoja de información a los participantes y he sido informado/a de la naturaleza del estudio, que se resume en dicha hoja.
- He podido hacer preguntas para aclarar mis dudas.
- Puedo hacer cualquier pregunta en cualquier momento sobre este proyecto.
- He sido informado/a sobre mis derechos como participante en la investigación y, voluntariamente consiento en ceder mi material biológico y genético (muestras de sangre y orina) bajo las condiciones descritas y únicamente para los objetivos definidos.

Respondiendo a las preguntas de abajo declaro que:

- Deseo ser informado de los resultados clínicamente relevantes. Si  No
- Accedo a los análisis genéticos y epigenéticos opcionales que se realizaran dentro del marco de este estudio. Si  No
- Acepto que las muestras y datos sean utilizados y almacenados más tiempo que para los objetivos concretos del estudio y puedan ser utilizadas en futuros estudios científicos dentro del campo de la salud o la nutrición. Si  No
- Si la respuesta a la pregunta 3 es "No": Accedo a que se me contacte en un futuro en el caso de que estime oportuno añadir nuevos datos a los recogidos inicialmente o muestras biológicas adicionales. Si  No

| Firma del padre/ tutor                                                                                                                                                                                                                                                                                                                                                                                                                                                                                                                                                                          | Firma de la madre/ tutor | Firma del informador                                                                                                                                                                                                                                                                                                                                                                                                        |
|-------------------------------------------------------------------------------------------------------------------------------------------------------------------------------------------------------------------------------------------------------------------------------------------------------------------------------------------------------------------------------------------------------------------------------------------------------------------------------------------------------------------------------------------------------------------------------------------------|--------------------------|-----------------------------------------------------------------------------------------------------------------------------------------------------------------------------------------------------------------------------------------------------------------------------------------------------------------------------------------------------------------------------------------------------------------------------|
| Fecha __/__/____<br>Su firma indica que usted ha leído y entiende la información antedicha, que usted ha discutido este estudio con la persona que obtiene este consentimiento, que usted ha decidido participar basado en la información proporcionada, y que se le ha dado a usted una copia de este formulario.<br>En caso que únicamente uno de los dos progenitores o cuidadores legales esté presente en esta entrevista, su firma implica que el otro progenitor está de acuerdo. De todas formas se le facilitará una hoja de firma para que esta sea entregada en la siguiente visita. |                          | Fecha __/__/____<br>Declaro que los requisitos para el consentimiento informado para este proyecto han sido satisfechos, que he proporcionado al participante una copia de este formulario, discutido con él/ella el proyecto y le he explicado en términos no técnicos la información contenida en este documento. Igualmente, certifico que animé al participante a que hiciera preguntas y que todas fueron contestadas. |

(Copia para el investigador)

**CONSENTIMIENTO INFORMADO**

ID: \_\_\_\_\_

Sr./Sra. .... informa al padre/madre  
 Sr./Sra. .... en relación al estudio  
 TOMI.

He sido informado/a sobre los derechos de mi hijo/a y los posibles riesgos y beneficios de su participación en el proyecto:

- La participación de mi hijo/a en este estudio es voluntaria.
- Se garantiza que los derechos y atención sanitaria de mi hijo/a no se verán influenciados por mi decisión.
- Los resultados relevantes que se obtengan a través de este proyecto podrán ser publicados pero mis datos personales nunca serán revelados a no ser que lo requiera la ley.
- En el caso de que tenga cualquier duda o problema relacionado con el estudio, puedo contactar con Dr. Ricardo Closa, Dr. Joaquín Escribano, Dra. Natalia Ferré y Dra. Verónica Luque a través de los teléfonos 977759364, 977759365, 619733840 (Tarragona), 616891314 (Reus).
- Me ha sido entregada la hoja de información a los participantes y he sido informado/a de la naturaleza del estudio, que se resume en dicha hoja.
- He podido hacer preguntas para aclarar mis dudas.
- Puedo hacer cualquier pregunta en cualquier momento sobre este proyecto.
- He sido informado sobre mis derechos como participante en la investigación y, voluntariamente consiento en ceder mi material biológico y genético (muestras de sangre y orina) bajo las condiciones descritas y únicamente para los objetivos definidos.

Respondiendo a las preguntas de abajo declaro que:

- Deseo ser informado de los resultados clínicamente relevantes. Si  No
- Accedo a los análisis genéticos y epigenéticos opcionales que se realizaran dentro del marco de este estudio. Si  No
- Acepto que las muestras y datos sean utilizados y almacenados más tiempo que para los objetivos concretos del estudio y puedan ser utilizadas en futuros estudios científicos dentro del campo de la salud o la nutrición. Si  No
- Si la respuesta a la pregunta 3 es "No": Accedo a que se me contacte en un futuro en el caso de que estime oportuno añadir nuevos datos a los recogidos inicialmente o muestras biológicas adicionales. Si  No

| Firma del padre/ tutor                                                                                                                                                                                                                                                                                                                                                                                                                                                                                                                                                                          | Firma de la madre/ tutor | Firma del informador                                                                                                                                                                                                                                                                                                                                                                                                        |
|-------------------------------------------------------------------------------------------------------------------------------------------------------------------------------------------------------------------------------------------------------------------------------------------------------------------------------------------------------------------------------------------------------------------------------------------------------------------------------------------------------------------------------------------------------------------------------------------------|--------------------------|-----------------------------------------------------------------------------------------------------------------------------------------------------------------------------------------------------------------------------------------------------------------------------------------------------------------------------------------------------------------------------------------------------------------------------|
| Fecha __/__/____<br>Su firma indica que usted ha leído y entiende la información antedicha, que usted ha discutido este estudio con la persona que obtiene este consentimiento, que usted ha decidido participar basado en la información proporcionada, y que se le ha dado a usted una copia de este formulario.<br>En caso que únicamente uno de los dos progenitores o cuidadores legales esté presente en esta entrevista, su firma implica que el otro progenitor está de acuerdo. De todas formas se le facilitará una hoja de firma para que esta sea entregada en la siguiente visita. |                          | Fecha __/__/____<br>Declaro que los requisitos para el consentimiento informado para este proyecto han sido satisfechos, que he proporcionado al participante una copia de este formulario, discutido con él/ella el proyecto y le he explicado en términos no técnicos la información contenida en este documento. Igualmente, certifico que animé al participante a que hiciera preguntas y que todas fueron contestadas. |

(Copia para el investigador, en caso que se obtenga posteriormente el consentimiento de uno de los dos progenitores)

**CONSENTIMIENTO INFORMADO** ID: \_\_\_\_\_

Sr./Sra. .... informa al padre/madre  
 Sr./Sra. .... en relación al estudio  
 TOMI.

He sido informado/a sobre los derechos de mi hijo/a y los posibles riesgos y beneficios de su participación en el proyecto:

- La participación de mi hijo/a en este estudio es voluntaria.
- Se garantiza que los derechos y atención sanitaria de mi hijo/a no se verán influenciados por mi decisión.
- Los resultados relevantes que se obtengan a través de este proyecto podrán ser publicados pero mis datos personales nunca serán revelados a no ser que lo requiera la ley.
- En el caso de que tenga cualquier duda o problema relacionado con el estudio, puedo contactar con Dr. Ricardo Closa, Dr. Joaquín Escribano, Dra. Natalia Ferré y Dra. Verónica Luque a través de los teléfonos 977759364, 977759365, 619733840 (Tarragona), 616891314 (Reus).
- Me ha sido entregada la hoja de información a los participantes y he sido informado/a de la naturaleza del estudio, que se resume en dicha hoja.
- He podido hacer preguntas para aclarar mis dudas.
- Puedo hacer cualquier pregunta en cualquier momento sobre este proyecto.
- He sido informado sobre mis derechos como participante en la investigación y, voluntariamente consiento en ceder mi material biológico y genético (muestras de sangre y orina) bajo las condiciones descritas y únicamente para los objetivos definidos.

Respondiendo a las preguntas de abajo declaro que:

- Deseo ser informado de los resultados clínicamente relevantes. Si  No
- Accedo a los análisis genéticos y epigenéticos opcionales que se realizaran dentro del marco de este estudio. Si  No
- Acepto que las muestras y datos sean utilizados y almacenados más tiempo que para los objetivos concretos del estudio y puedan ser utilizadas en futuros estudios científicos dentro del campo de la salud o la nutrición. Si  No
- Si la respuesta a la pregunta 3 es “No”: Accedo a que se me contacte en un futuro en el caso de que estime oportuno añadir nuevos datos a los recogidos inicialmente o muestras biológicas adicionales. Si  No

|                                                                                                                                                                                                                                                                                                                                                                                                                |                                                                                                                                                                                                                                                                                                                                                                                                                                                                                                                  |
|----------------------------------------------------------------------------------------------------------------------------------------------------------------------------------------------------------------------------------------------------------------------------------------------------------------------------------------------------------------------------------------------------------------|------------------------------------------------------------------------------------------------------------------------------------------------------------------------------------------------------------------------------------------------------------------------------------------------------------------------------------------------------------------------------------------------------------------------------------------------------------------------------------------------------------------|
| <p><b>Firma del padre/madre/tutor</b></p><br><br><br><br><br><br><br><br><br><br><p>Fecha __/__/----</p> <p>Su firma indica que usted ha leído y entiende la información antedicha, que usted ha discutido este estudio con la persona que obtiene este consentimiento, que usted ha decidido participar basado en la información proporcionada, y que se le ha dado a usted una copia de este formulario.</p> | <p><b>Firma del informador</b></p><br><br><br><br><br><br><br><br><br><br><p>Fecha __/__/----</p> <p>Declaro que los requisitos para el consentimiento informado para este proyecto han sido satisfechos, que he proporcionado al participante una copia de este formulario, discutido con él/ella el proyecto y le he explicado en términos no técnicos la información contenida en este documento. Igualmente, certifico que animé al participante a que hiciera preguntas y que todas fueron contestadas.</p> |
|----------------------------------------------------------------------------------------------------------------------------------------------------------------------------------------------------------------------------------------------------------------------------------------------------------------------------------------------------------------------------------------------------------------|------------------------------------------------------------------------------------------------------------------------------------------------------------------------------------------------------------------------------------------------------------------------------------------------------------------------------------------------------------------------------------------------------------------------------------------------------------------------------------------------------------------|



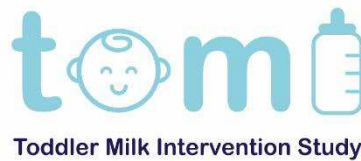

## Elterninformation und Einverständniserklärung

### ***Einfluss von Milcheiweiß auf das Wachstum und die spätere Entwicklung von Übergewicht (ToMI-Studie)***

**Studienregistrierung: NCT 02907502 bei [clinicaltrials.gov](http://clinicaltrials.gov)**

*Bitte lesen Sie diese Information und Einverständniserklärung sorgfältig durch. Das Studienpersonal wird Ihnen jederzeit alle Fragen beantworten.*

*Die ToMI-Studie wurde durch die Ethikkommission und den Datenschutzbeauftragten des Klinikum der Universität München geprüft und zustimmend bewertet.*

*Sie erhalten eine Kopie dieses Schreibens für Ihre Unterlagen.*

1  
2  
3 Liebe Familie,  
4

5 wir am Dr. von Haunerschen Kinderspital in München führen eine Studie zum Einfluss  
6 von Milcheiweiß auf Gewicht und Wachstum von Kindern durch. Die Studie heißt  
7 ToMI-Studie (ToMI von engl. *toddler's milk intervention* = Kleinkindermilch  
8 Intervention).  
9

### 10 11 Warum führen wir die Studie durch

12 Die zunehmende Häufigkeit von Übergewicht und Fettleibigkeit (Adipositas) stellt ein  
13 großes medizinisches Problem dar. Inzwischen sind alle Altersgruppen davon  
14 betroffen, insbesondere auch Klein- und Schulkinder. Wir befassen uns sehr intensiv  
15 mit den frühkindlichen Ursachen für diese Entwicklung. Unter anderem leiten wir das  
16 weltweit größte Forschungsprojekt zu Auswirkungen der frühkindlichen Ernährung  
17 auf die Gesundheit im späteren Leben (<http://www.project-earlynutrition.eu>). Vor  
18 einigen Jahren konnten wir in einer anderen EU-finanzierten Studie („CHOP-Studie“)  
19 mit Säuglingen zeigen, dass ein niedrigerer Eiweißgehalt in der Säuglingsnahrung  
20 während des ersten Lebensjahres dazu beiträgt, dass die Kinder im Schulalter seltener  
21 übergewichtig sind.  
22

23 Bei der ToMI-Studie soll nun untersucht werden, ob sich die gleiche Wirkung durch  
24 weniger Milcheiweiß auch im zweiten Lebensjahr zeigt. Dafür wurde speziell eine  
25 Kleinkindermilch mit reduziertem Eiweißgehalt hergestellt, die im Vergleich zu  
26 herkömmlicher Kleinkindermilch und Kuhmilch deutlich weniger Milcheiweiß enthält.  
27

28 Neben der Ernährung ist auch das Maß an körperlicher Aktivität in der Kindheit  
29 ausschlaggebend für die gesunde Entwicklung eines Kindes. Wir wollen dabei vor  
30 allem den Zusammenhang zwischen der frühen Ernährung und dem kindlichen  
31 Aktivitätsverhalten untersuchen, aber auch mehr über mögliche Einflussgrößen für das  
32 Aktivitätsniveau Ihres Kindes herausfinden.  
33

### 34 Studienzweck

35 Ziel der ToMI-Studie ist es, das Wachstum, die Entwicklung und den Stoffwechsel von  
36 Kleinkindern zu untersuchen, die im zweiten Lebensjahr eine eiweißreduzierte  
37 Kleinkindermilch erhalten.  
38

### 39 Ablauf der Studie (siehe auch Bild 1)

40 Falls Sie der Teilnahme zustimmen, wird Ihr Kind zufällig entweder der  
41 herkömmlichen oder einer eiweißreduzierten Kleinkindermilch zugeteilt. Um die  
42 Studienergebnisse nicht beeinflussen zu können, werden weder Sie noch wir erfahren,  
43 welche Kindermilch Ihr Kind bekommt. Die Studienmilch soll im 2. Lebensjahr alle  
44 anderen Milchgetränke und -nahrungen, somit auch Kuhmilch, ersetzen. Sie erhalten  
45 die Studienmilch von uns kostenfrei für das gesamte zweite Lebensjahr. Mit dem  
46 zweiten Geburtstag Ihres Kindes endet die Phase, in der Ihr Kind die Studiennahrung  
47 bekommt. Insgesamt werden 1618 Kleinkinder an der ToMI-Studie teilnehmen (davon  
48 809 in München und 809 in Reus und Tarragona in Spanien) und vom 1. bis zum 6.  
49 (72. Monat) Geburtstag beobachtet.  
50

51 Im Alter von 12, 18, 24, 48 und 72 Monaten werden wir Ihr Kind im Dr. von  
52 Haunerschen Kinderspital sehen. Bei jedem Besuch werden wir Ihr Kind untersuchen  
53 und Größe, Gewicht und weitere Körpermaße aufnehmen. Wir werden Ihnen jeweils  
54  
55  
56  
57  
58  
59  
60

Fragen zur Gesundheit und Verhalten Ihres Kindes stellen. Um zu erfahren, wie und wo Ihr Kind aufwächst, werden wir Sie anfangs auch zu Ihrer Herkunft, Ausbildung und Familienstruktur sowie zu Ernährungsgewohnheiten im ersten Lebensjahr befragen. Um zu verstehen wie sich Ihr Kind sonst ernährt, werden wir Sie zu jedem Zeitpunkt fragen, was und wieviel Ihr Kind in den vergangenen 24 Stunden gegessen und getrunken hat. Den Urin Ihres Kindes würden wir gerne jedes Mal untersuchen.

Im Alter von 24 und 48 Monat bitten wir Sie einen Fragebogen zur allgemeinen Entwicklung Ihres Kindes auszufüllen. Ab dem 2. Lebensjahr bestimmen wir die Körperzusammensetzung mittels BodPod®. Die BodPod®-Messung ist eine kurze, unkomplizierte Untersuchung mittels Luftverdrängung zur Bestimmung des Körperfettanteils (<http://www.bodpod.com/de/produkte/koerperzusammensetzung>).

Im Zuge der Studienbesuche mit 2, 4 und 6 Jahren wollen wir die körperliche Aktivität Ihres Kindes messen. Zusätzlich möchten wir mit Hilfe eines Fragebogens Daten über die körperliche Aktivität von Ihnen und Ihrem Kind sammeln. Die Aktivität wird mit einem Akzelerometer (wGTx3-BT, ActiGraph, Pensacola, USA) gemessen. Der Sensor wird mit Hilfe eines Gummibandes an der Hüfte Ihres Kindes befestigt. Aus den gewonnenen Daten können wir Rückschlüsse auf die tägliche Dauer und Intensität des Bewegungsverhaltens Ihres Kindes ziehen.

Eine Blutabnahme (ca. 6 ml) ist am Anfang und mit 2 und 6 Jahren vorgesehen. Wenn es gewünscht wird, können wir zuvor etwas Emla® Crème auf die Haut Ihres Kindes auftragen, um die Einstichstelle örtlich zu betäuben.

Wir werden Sie zusätzlich alle 2-6 Monate kontaktieren, Sie anfangs zum Verzehr der Studiennahrung befragen und uns kurz nach dem Wohlbefinden Ihres Kindes erkundigen.

Weitere Informationen zur Studie finden Sie auch auf unserer Homepage unter <http://www.klinikum.uni-muenchen.de/de/forschung/TOMI-Studie.html>.

Eine Beschreibung der Studie steht auch unter <http://www.clinicaltrials.gov> zur Verfügung.

Die Studiennahrung wurde von der Firma Nestec (Avenue Nestlé 55, CH - 1800 Vevey, Schweiz) für die Studie entwickelt und produziert. Die Nahrung entspricht den europäischen Richtlinien und industriellen Standards. Sie enthält 48 kcal / 100ml Energie und 0,7 g / 100ml bzw. 3,0 g / 100ml Eiweiß in der Eiweiß-reduzierten bzw. der herkömmlichen Kindermilch. Sie ist geeignet für die Ernährung von Kleinkindern im Alter von 12 bis 24 Lebensmonaten und darf nur in diesem Zeitraum durch das Studienkind konsumiert werden.

### Familienkost, Beikost und Getränke

Natürlich darf Ihr Kind auch während der Studie seine gewohnte Kleinkinderkost bzw. Familienkost zu sich nehmen. Wir bitten Sie nur, die Milchmahlzeiten Ihres Kindes durch Studiennahrung zu ersetzen. Auch die Herstellung von Breimahlzeiten, Puddings oder ähnlicher milchhaltiger Speisen soll möglichst mit der Studienmilch erfolgen. Nach dem 2. Geburtstag sind Sie völlig frei bei der Ernährung Ihres Kindes.

### Nutzen und Risiken bei der Teilnahme an der Studie

1  
2  
3 Durch die Teilnahme an dieser Studie bekommt Ihr Kind die Möglichkeit, eine  
4 neuartige Kleinkindermilch zu verzehren. Die Kleinkindermilch wird nach  
5 europäischen Richtlinien und industriellem Standard hergestellt. Die neuartige  
6 Kleinkindermilch enthält ausreichend Eiweiß und ist im Eiweißgehalt vergleichbar mit  
7 Muttermilch. Trotzdem kann es zu Unverträglichkeiten bei Ihrem Kind kommen. Wir  
8 erwarten jedoch keine Reaktionen, die über das normale Maß bei Verwendung von  
9 Kleinkindermilch hinausgehen.  
10

11  
12 Eine Teilnahme an der Aktivitätsmessung kann wichtige Hinweise auf das  
13 Aktivitätsverhalten Ihres Kindes liefern. Sie erhalten nach der Abgabe des  
14 Akzelerometers eine individuelle Einschätzung, welche Ihnen hilft, das  
15 Aktivitätsniveau Ihres Kindes besser zu verstehen und ggf. gezielt zu fördern.  
16

17 Auch wenn das Gerät sehr robust ist und in der alltäglichen Nutzung nicht beschädigt  
18 werden kann, ist jedoch bei grober Gewalt die Ablösung von Kleinteilen möglich, die  
19 verschluckt werden können.  
20

21 Das Risiko bei der Blutentnahme ist verschwindend gering. Es ist möglich, dass es zur  
22 Bildung eines blauen Flecks und in den seltensten Fällen zu Infektionen an der  
23 Einstichstelle kommt.  
24

25 Falls im Verlauf der Studie wichtige neue Erkenntnisse bekannt werden, die sich auf  
26 Ihre Entscheidung über die weitere Teilnahme an dieser Studie auswirken könnten,  
27 werden Sie darüber umgehend informiert. Sie erhalten ggfs. eine neue  
28 Elterninformation und Einverständniserklärung zum Unterzeichnen, sofern Sie weiter  
29 an der Studie teilnehmen möchten.  
30  
31

32 Sie können aus der Studie ausgeschlossen werden, wenn es medizinische oder  
33 organisatorische Gründe notwendig machen. In diesem Falle werden wir Sie darüber  
34 informieren und die bis dahin erhobenen Daten anonymisiert verwenden.  
35  
36

### 37 Laboruntersuchungen

38 Blutwerte liefern wichtige Informationen, um die Auswirkungen der Ernährung auf  
39 den Stoffwechsel des Körpers beurteilen zu können. Entscheidend sind für uns aber  
40 nicht die einzelnen Werte Ihres Kindes – wie bei Krankheiten oder der Bewertungen  
41 durch Ihren Kinderarzt -, sondern der Mittelwert von allen ToMI-Kindern. Das  
42 bedeutet: Es sollten möglichst alle Kinder mitmachen, damit wir tatsächlich neue  
43 Erkenntnisse aus dem Blut Ihres Kindes gewinnen können! Daher hoffen wir sehr, dass  
44 Sie einer Blutentnahme bei Ihrem Kind zustimmen. In den Blut und Urinproben führen  
45 wir neben Routineuntersuchungen zur Gesundheit (z.B. Blutbild) vor allem Messungen  
46 von Stoffen durch, die mit der Eiweiß- und Energieverwertung (z.B. Harnstoff,  
47 Glukose, Blutfette) zusammenhängen. Daneben werden Hormone, die mit Wachstum  
48 und Gewichtsentwicklung im Zusammenhang stehen, bestimmt. Wir werden Sie über  
49 das Blutbild sowie die Untersuchung von Blutfetten informieren. Alle anderen  
50 Blutwerte werden erst am Ende der Studie bestimmt und dienen ausschließlich  
51 wissenschaftlichen Zwecken.  
52  
53

54 Um die Proben zu verschlüsseln, werden sie statt mit dem Namen Ihres Kindes mit  
55 einem „Pseudonym“ versehen. Das Pseudonym ist eine Kombination aus Buchstaben  
56 und Zahlen. Nur mit Hilfe von Computerprogrammen (Pseudonymisierungsschlüssel),  
57 die Kind und Pseudonym einander zuordnen, kann herausgefunden werden, welche  
58  
59  
60

Probe zu welchem Kind gehört. Der Pseudonymisierungsschlüssel wird nicht an Dritte weitergegeben.

Da in der Forschung ständig neue Erkenntnisse gewonnen werden, bitten wir Sie um die Erlaubnis, eventuell überschüssige Blutproben anonymisiert (eine Zuordnung zu Ihrem Kind ist nicht mehr möglich) bis zu 10 Jahre nach Studienende aufbewahren zu dürfen, damit Blut nicht vergeudet und noch für künftige, innovative Analysen zur Verfügung steht.

### Genetische Untersuchungen

Eine Frage die uns beschäftigt ist, wie Veränderungen am Anfang des Lebens (in dieser Studie eine Veränderung der Ernährung im 2. Lebensjahr) den Stoffwechsel und die Gesundheit später beeinflussen können. Eine Möglichkeit, warum es zu einer langfristigen, eventuell lebenslangen Prägung kommen könnte, sind Veränderungen in der Steuerung der Genaktivierung. Während man vor kurzem noch glaubte, dass man Erbfaktoren, also Gene, einfach hat oder nicht hat, weiß man heute viel mehr, wie Gene „an- und ausgeschaltet“ werden können („Epigenetik“). Durch eine Untersuchung der Erbsubstanz im Blut können wir feststellen, welche für den Stoffwechsel, die Körperzusammensetzung, Übergewicht und damit einhergehende Erkrankungen relevante Gene an- oder ausgeschaltet wurden.

Wenn Sie der Untersuchung zustimmen, wird aus einer Blutprobe Ihres Kindes die Erbsubstanz (DNA) gewonnen und untersucht. Die Blutproben werden im Alter von 12, 24 und 72 Monaten gesammelt, um Veränderungen in der Steuerung der Gene feststellen zu können. Die eigentlichen genetischen Untersuchungen erfolgen erst zu einem späteren Zeitpunkt, wenn von möglichst allen Probanden die DNA zu den drei genannten Zeitpunkten gewonnen wurde.

Für die Genuntersuchung muss keine zusätzliche Blutprobe abgenommen werden. Es wird das „Abfallprodukt“ der übrigen Blutproben verwendet, die abgetrennten Blutzellen, die ansonsten für keine Untersuchung genutzt werden können. Aus diesen Zellen wird die Erbsubstanz (DNA) gewonnen und die meisten der bisher bekannten, informationsenthaltenden Abschnitte des Erbguts untersucht. Anhand dieser Informationen können wir feststellen, welche Gene an- und ausgeschaltet wurden, die für Stoffwechsel, Körperzusammensetzung und Übergewicht sowie die assoziierte Erkrankungen relevant sind. Außerdem können wir diese Veränderungen in Zusammenhang mit den vielen Einflüssen betrachten, die wir im Rahmen der Studie bei Ihrem Kind beobachten.

Aus der Untersuchung von Erbfaktoren und deren Aktivität ergibt sich für Ihr Kind kein direkter Vorteil. Mit Ihrer Teilnahme unterstützen Sie jedoch die Forschung, wie frühkindliche Ernährung und Verhaltensweisen sowie Umweltfaktoren andauernde Veränderungen verursachen. Dadurch kann möglicherweise die Grundlage für Verbesserungen in der Diagnose und Behandlung von Erkrankungen gelegt werden.

Die Untersuchungen auf Erbfaktoren werden pseudonymisiert bzw. in irreversibel anonymisierter Form am Helmholtz-Zentrum München, Institut für Molekulare Epidemiologie durchgeführt. Durch eine doppelte Kodierung (den pseudonymisierten Proben wird vor der Aufarbeitung eine fortlaufende Labor-Nummer zugeordnet) ist es den Mitarbeitern des Helmholtz-Zentrums nicht möglich, Rückschlüsse auf die persönlichen Daten des Probanden zu ziehen. Damit ist sichergestellt, dass diese

1  
2  
3 besonders sensiblen genetischen Daten zusätzlich geschützt werden. Die genetischen  
4 Untersuchungen werden nur für Forschungszwecke im Rahmen der ToMI-Studie  
5 durchgeführt. Es ist nicht möglich und nicht vorgesehen Ergebnisse mitzuteilen. Die  
6 statistische Auswertung der genetischen Daten wird unter Verantwortung von Prof. B.  
7 Koletzko durchgeführt, ohne Bezug zum Namen Ihres Kindes.  
8  
9  
10  
11  
12  
13  
14  
15  
16  
17  
18  
19  
20  
21  
22  
23  
24  
25  
26  
27  
28  
29  
30  
31  
32  
33  
34  
35  
36  
37  
38  
39  
40  
41  
42  
43  
44  
45  
46  
47  
48  
49  
50  
51  
52  
53  
54  
55  
56  
57  
58  
59  
60

For peer review only

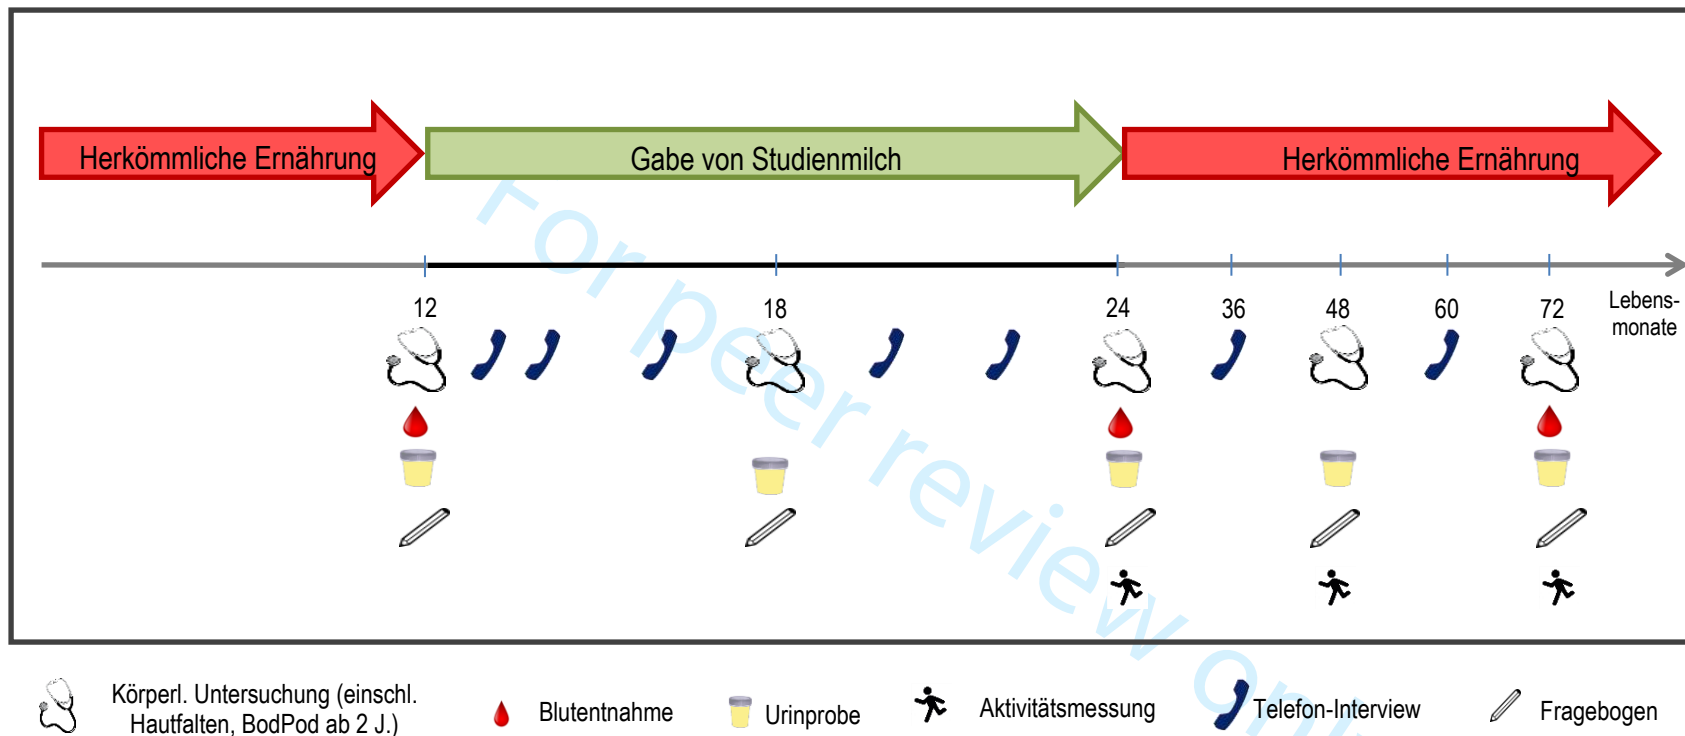

**Bild 1.** Ablauf der Studie

### Studienauswertung

Die Daten, Proben und Fragebögen werden ausschließlich für den oben genannten Studienzweck verwendet. Die Studienauswertung wird gemeinsam mit Nestec durchgeführt. Die Veröffentlichung von Ergebnissen und deren Interpretation erfolgt einvernehmlich.

### Studienfinanzierung

Die Studie wird durch die Firma Nestec Ltd. (Avenue Nestlé 55, CH - 1800 Vevey) finanziert. Die Finanzierung umfasst das nötige Studienpersonal, Laboruntersuchungen und die Studiennahrung. Weitere wissenschaftliche Untersuchungen werden durch öffentliche und gegebenenfalls private Finanzierungen erfolgen.

### Versicherungsschutz

Auch wenn keinerlei Komplikationen erwartet werden, so sind doch alle Studienteilnehmer durch eine Studienversicherung abgesichert. Der Versicherungsschutz erstreckt sich auf alle Gesundheitsschädigungen, die als Folge der im Zusammenhang mit der Studie angewendeten Maßnahmen eintreten bis zu einer Höchstsumme von € 5.000.000.

Im Schadensfall können Sie sich direkt an den Versicherer (Zurich Insurance plc NfD, Solmsstraße 27-37, 60486 Frankfurt am Main, Tel.: 069 7115-0; Policen-Nummer: 801.380.024.996) wenden und Ihre Ansprüche geltend machen. Um den Versicherungsschutz nicht zu gefährden, müssen Sie folgendes beachten:

- Teilen Sie uns alle medizinischen Behandlungen mit, denen sich Ihr Kind während der Studienphase unterzieht (Ausnahmen sind Vorsorgeuntersuchungen und Impfungen). Dies gilt auch für die Einnahme neuer Medikamente.
- Teilen Sie eine Gesundheitsschädigung, die als Folge der Studienteilnahme eingetreten sein könnte, bitte dem zuständigen Studienpersonal und der oben genannten Versicherungsgesellschaft mit.

### Freiwilligkeit / Rücktrittsklausel

Die Teilnahme an der Studie ist freiwillig. Mit Ihrer Einwilligung auf der „Einverständniserklärung“ geben Sie Ihr Einverständnis zur Teilnahme Ihres Kindes an dieser Studie. **Sie haben das Recht, zu jeder Zeit ohne Angabe von Gründen und ohne Nachteile die Teilnahme an der Studie zu beenden.**

### Aufwandsentschädigung

Für die Teilnahme an der Studie erhalten Sie eine Aufwandsentschädigung.

Wenn Sie weitere Fragen zu dieser Studie haben oder wenn Sie der Ansicht sind, eine studienbezogene Gesundheitsschädigung erlitten zu haben, stehen wir Ihnen gern zur Verfügung: Dr. V. Grote, V.Jäger, M. Meier, S. Vogt, N. Antl, und P. Becker.  
Tel:089-4400-57427; E-Mail: Tomi.Studie@med.uni-muenchen.de



## Datenschutz: Im Rahmen der Studie gelten folgende Regeln des Datenschutzes.

### **Datenschutz**

Bei dieser Studie werden die Vorschriften über die ärztliche Schweigepflicht und den Datenschutz entsprechend den europäischen, deutschen und bayerischen Richtlinien und der Deklaration von Helsinki eingehalten. Um Sie kontaktieren zu können, werden Ihre Kontaktdaten in einer Datenbank (MedSciNet, Stockholm, Schweden, <http://medscinet.com/>) gespeichert. In dieser Datenbank werden persönliche, jedoch keinerlei medizinischen Daten gespeichert. Zur Auslieferung der Studiennahrung erfolgt eine Weitergabe Ihrer Adressdaten an ein externes Logistik-Unternehmen (OCasa Lodilat Logistica S.L., Avda de la Astronomia 8, 28830 San Fernando de Henares, Spain). Eine Weiterverwendung dieser Daten zu anderen Zwecken als der Auslieferung der Studiennahrung ist dem Unternehmen untersagt. Das Unternehmen unterliegt den deutschen gesetzlichen Datenschutzbestimmungen.

Alle weiteren Daten – also „medizinische Daten“ –, die nicht der Kontaktaufnahme und Kontaktorganisation dienen, werden in getrennten Datenbanken (Medidata Solutions, 350 Hudson St, New York, NY 10014 sowie lokal im Klinikum der Universität München) gespeichert. Persönliche Daten wie Name oder Adresse werden in diesen Datenbanken nicht erfasst. Die Zuordnung zum Namen Ihres Kindes kann nur über einen Verschlüsselungscode erfolgen, der nur unter aktiver Hilfe des Studienpersonals einem Namen zugeordnet werden kann. So sind alle erhobenen Daten und Befunde Ihres Kindes pseudonymisiert.

Sie haben das Recht, jederzeit Auskunft über Ihre gespeicherten personenbezogenen Daten zu erhalten, diese zu berichtigen oder ggf. löschen zu lassen. Verantwortlich für die Datenverarbeitung ist Prof Dr. Berthold Koletzko sowie Dr. Veit Grote als dessen Stellvertreter.

### Kontaktdaten der Datenschutzbeauftragten:

Bei Beschwerden haben Sie das Recht sich an die jeweilige Datenschutz-Aufsichtsbehörde zu wenden. Der lokale Datenschutzbeauftragte für das Klinikum der Universität München ist:

Herr Gerhard Meyer  
Klinikum der Universität München  
Pettenkoferstr. 8  
80336 München  
E-Mail: [datenschutz@med.uni-muenchen.de](mailto:datenschutz@med.uni-muenchen.de)

Die übergeordnete Behörde für die LMU und das Klinikum ist:

Bayerischer Landesbeauftragter für den Datenschutz (BayLfD)  
Postanschrift: Postfach 22 12 19, 80502 München  
Hausanschrift: Wagnmüllerstr. 18, 80538 München  
Tel.: 089 212672-0  
Fax: 089 212672-50

Datenzugang:

Der Zugang zu den Adressdaten und zum Verschlüsselungscode ist auf folgende Personen der Studienorganisation beschränkt: Prof. B. Koletzko, Dr. V. Grote, V. Jäger, M. Meier, S. Vogt, N. Antl, P. Becker und U. Handel. Weitere Personen aus dem Studienzentrum (Dr. von Haunersches Kinderspital, Abt. Stoffwechsel und Ernährungsmedizin unter der Leitung von Prof. B. Koletzko) können zur Studienorganisation im Verlauf der Studie nach Zustimmung der Studienleitung Zugang erhalten. Die Firma Nestec hat darüber hinaus die Firma PAREXEL International GmbH beauftragt, die Qualität der Studie vor Ort zu überwachen (sog. „Monitoring“). Das Unternehmen wird zum Datenschutz verpflichtet und hat vor Ort Zugang zu persönlichen und medizinischen Daten. Eine Entschlüsselung einzelner Studienteilnehmer erfolgt lediglich in Fällen, in denen es die Sicherheit erfordert („medizinische Gründe“). Das Unternehmen unterliegt den deutschen, gesetzlichen Datenschutzbestimmungen.

Die Firma Nestec hat kontinuierlichen Zugang zu pseudonymisierten Daten, jedoch nie zu den Kontaktdaten. Diese pseudonymisierten Daten werden von Nestec auch in anderen Ländern als Deutschland oder der Schweiz (Sitz von Nestec) verarbeitet. Hierbei wird Ihre Identität gewahrt und die Vertraulichkeit Ihrer Daten gewährleistet. Es gelten für diese Drittländer /internationale Organisationen vertraglich die europäischen und deutschen gesetzlichen Datenschutzbestimmungen. Einige Stoffwechseluntersuchungen werden in den Laboratorien der Firma Nestec, Avenue Nestlé 55, CH - 1800 Vevey, Schweiz durchgeführt. Die genetischen und epigenetischen Analysen werden in Zusammenarbeit mit dem Helmholtz-Zentrum, Institut für Molekulare Epidemiologie, München erstellt. Alle anderen Untersuchungen werden in Laboratorien des Klinikums der Universität München durchgeführt. Die Blutproben werden hierzu nur mit dem Verschlüsselungscode weitergegeben und lassen keinen direkten Rückschluss auf den Studienteilnehmer zu. Für die genetischen und epigenetischen Analysen wird eine erneute 2. Verschlüsselung durch die Mitarbeiter des Helmholtz-Zentrums durchgeführt. Diese doppelte Kodierung stellt sicher, dass die genetischen und epigenetischen Daten zusätzlich geschützt werden. Eine Entblindung ist nur durch das Studienzentrum, nicht aber durch die Mitarbeiter des Helmholtz-Zentrums möglich.

Im Falle des Widerrufs der Einwilligung werden der Name und Ihre persönlichen Kontaktdaten aus unserer Datenbank gelöscht. Die bis dahin gespeicherten Daten Ihres Kindes werden nun anonymisiert verwendet. Außerdem werden die Kontaktdaten aller Studienteilnehmer innerhalb eines Monats nach Abschluss der Studie gelöscht. Die schriftlichen Unterlagen, inklusive dieser Einverständniserklärung, werden im Dr. von Haunerschen Kinderspital bis zum Ende der Studie und in einem dafür geeigneten Lager bis zum Ablauf der gesetzlichen Aufbewahrungsfrist (12 Jahre nach Studienende) aufbewahrt. Im Falle von Veröffentlichungen der Studienergebnisse bleibt die Vertraulichkeit der persönlichen Daten Ihres Kindes ebenfalls gewährleistet, denn die Daten werden, wenn überhaupt, in anonymisierter Form wiedergegeben.

Auf Wunsch werden wir Sie über allgemeine Studienergebnisse informieren.

Im Falle von zusätzlichen, bisher nicht geplanten Untersuchungen oder Datenerhebungen, die über den oben genannten Studienablauf hinausgehen, werden wir das zustimmende Votum der zuständigen Ethikkommission einholen.

Vor der Einwilligung in die Studie haben Sie hier die Möglichkeit gezielt Fragen zu notieren, die noch ausführlicher mit Ihnen besprochen werden sollen.

1  
2  
3  
4  
5  
6  
7  
8  
9  
10  
11  
12  
13  
14  
15  
16  
17  
18  
19  
20  
21  
22  
23  
24  
25  
26  
27  
28  
29  
30  
31  
32  
33  
34  
35  
36  
37  
38  
39  
40  
41  
42  
43  
44  
45  
46  
47  
48  
49  
50  
51  
52  
53  
54  
55  
56  
57  
58  
59  
60



**Einverständniserklärung & Datenschutzerklärung für die Teilnahme meines/unseres Kindes**

***Einfluss von Milcheiweiß auf das Wachstum und die spätere Entwicklung von Übergewicht (ToMI-Studie)***

\_\_\_\_\_  
Name, Vorname des Kindes

\_\_\_\_\_  
Geburtsdatum

Ich erkläre, dass mir die Studienbedingungen vollständig erläutert wurden und alle Fragen zu meiner Zufriedenheit geklärt wurden. Das Formblatt mit den Studieninformationen habe ich erhalten. Ich hatte ausreichend Zeit, dieses Formblatt zu lesen und Fragen zu stellen. Mögliche Risiken und Nachteile für mein Kind wurden mir erklärt. Ich weiß, dass ich jetzt und in Zukunft jede Frage bezüglich dieser Studie und der Untersuchungen stellen kann.

Ich weiß, dass ich/mein Kind jederzeit von der Teilnahme an der Studie zurücktreten kann, ohne dass ich dafür Gründe angeben muss oder dass mir oder meinem Kind Nachteile entstehen würden.

Hiermit willige ich in die Teilnahme meines Kindes in die Studie ein:

\_\_\_\_\_  
Ort, Datum

\_\_\_\_\_  
Name, Vorname  
1. Erziehungsberechtigte/r

\_\_\_\_\_  
Unterschrift  
1. Erziehungsberechtigte/r

**Ich besitze das alleinige Sorgerecht:     Ja     Nein**

\_\_\_\_\_  
Ort, Datum

\_\_\_\_\_  
Name, Vorname  
2. Erziehungsberechtigte/r

\_\_\_\_\_  
Unterschrift  
2. Erziehungsberechtigte/r

\_\_\_\_\_  
Ort, Datum

\_\_\_\_\_  
Name, Vorname  
Studienpersonal (Aufklärende/r)

\_\_\_\_\_  
Unterschrift  
Studienpersonal (Aufklärende/r)

Die Datenschutz-Information im Rahmen der Teilnehmerinformation habe ich zur Kenntnis genommen. Ich willige hiermit in die Erhebung und Verwendung der persönlichen Daten meines Kindes nach diesen Maßgaben ein.

\_\_\_\_\_  
Ort, Datum

\_\_\_\_\_  
Name, Vorname  
1. Erziehungsberechtigte/r

\_\_\_\_\_  
Unterschrift  
1. Erziehungsberechtigte/r

\_\_\_\_\_  
Ort, Datum

\_\_\_\_\_  
Name, Vorname  
2. Erziehungsberechtigte/r

\_\_\_\_\_  
Unterschrift  
2. Erziehungsberechtigte/r

\_\_\_\_\_  
Ort, Datum

\_\_\_\_\_  
Name, Vorname  
Studienpersonal (Aufklärende/r)

\_\_\_\_\_  
Unterschrift  
Studienpersonal (Aufklärende/r)

**Einverständnis- & Datenschutzerklärung für die genomweite Genotypisierung und epigenetische Untersuchungen meines/unseres Kindes im Rahmen der ToMI-Studie**

***Einfluss von Milcheiweiß auf das Wachstum und die spätere Entwicklung von Übergewicht (ToMI-Studie)***

\_\_\_\_\_  
Name, Vorname des Kindes

\_\_\_\_\_  
Geburtsdatum

Hiermit willige ich insbesondere ein, dass aus dem Blut meines Kindes **Erbmaterial gewonnen, aufbewahrt und untersucht** werden darf. Die genomweite Genotypisierung, sowie die epigenetischen Untersuchungen dienen der Aufdeckung genetischer Ursachen von Erkrankungen und Ursachen für Übergewicht und Stoffwechseleränderungen im Rahmen der ToMI-Studie. Die Teilnahme an der Untersuchung birgt keine weiteren gesundheitlichen Risiken über die erfolgende Blutentnahme hinaus.

Die Daten und Untersuchungsergebnisse werden ausschließlich für das Untersuchungsziel dieser Studie verwendet. Auf die verschlüsselten Daten können nur autorisierte Mitarbeiter der Studie zugreifen. Eine Weitergabe von Daten an unberechtigte Dritte erfolgt nicht. Die im Rahmen dieser Studie gewonnenen genetischen Daten werden bis zu 10 Jahren nach Abschluss der wissenschaftlichen Untersuchung oder bis auf Widerruf aufbewahrt.

Ich weiß, dass ich jetzt und in Zukunft weitere Fragen bezüglich dieser Studie und den einzelnen Untersuchungen stellen kann. Ich weiß, dass ich jederzeit von der freiwilligen Teilnahme an der Studie zurücktreten kann, ohne dass ich hierfür Gründe angeben muss.

Ich willige freiwillig in die Erhebung, Verarbeitung und Nutzung personenbezogener Daten nach Maßgabe des Aufklärungsbogens der Studie ein. Für die Erhebung, Verarbeitung und Nutzung ist der Leiter des Forschungsvorhabens, Herr Prof. Berthold Koletzko, verantwortlich.

\_\_\_\_\_  
Ort, Datum

\_\_\_\_\_  
Name, Vorname  
1. Erziehungsberechtigte/r

\_\_\_\_\_  
Unterschrift  
1. Erziehungsberechtigte/r

\_\_\_\_\_  
Ort, Datum

\_\_\_\_\_  
Name, Vorname  
2. Erziehungsberechtigte/r

\_\_\_\_\_  
Unterschrift  
2. Erziehungsberechtigte/r

\_\_\_\_\_  
Ort, Datum

\_\_\_\_\_  
Name, Vorname  
Studienpersonal (Aufklärende/r)

\_\_\_\_\_  
Unterschrift  
Studienpersonal (Aufklärende/r)

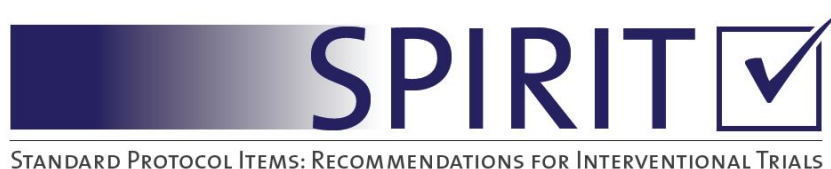

STANDARD PROTOCOL ITEMS: RECOMMENDATIONS FOR INTERVENTIONAL TRIALS

SPIRIT 2013 Checklist: Recommended items to address in a clinical trial protocol and related documents\*

| Section/item                      | Item No | Description                                                                                                                                                                                                                                                                              | Check/page |
|-----------------------------------|---------|------------------------------------------------------------------------------------------------------------------------------------------------------------------------------------------------------------------------------------------------------------------------------------------|------------|
| <b>Administrative information</b> |         |                                                                                                                                                                                                                                                                                          |            |
| Title                             | 1       | Descriptive title identifying the study design, population, interventions, and, if applicable, trial acronym                                                                                                                                                                             | Y          |
| Trial registration                | 2a      | Trial identifier and registry name. If not yet registered, name of intended registry                                                                                                                                                                                                     | 2          |
|                                   | 2b      | All items from the World Health Organization Trial Registration Data Set                                                                                                                                                                                                                 |            |
| Protocol version                  | 3       | Date and version identifier                                                                                                                                                                                                                                                              | 10         |
| Funding                           | 4       | Sources and types of financial, material, and other support                                                                                                                                                                                                                              | 13         |
| Roles and responsibilities        | 5a      | Names, affiliations, and roles of protocol contributors                                                                                                                                                                                                                                  | 1, 13      |
|                                   | 5b      | Name and contact information for the trial sponsor                                                                                                                                                                                                                                       | 13         |
|                                   | 5c      | Role of study sponsor and funders, if any, in study design; collection, management, analysis, and interpretation of data; writing of the report; and the decision to submit the report for publication, including whether they will have ultimate authority over any of these activities | 13         |
|                                   | 5d      | Composition, roles, and responsibilities of the coordinating centre, steering committee, endpoint adjudication committee, data management team, and other individuals or groups overseeing the trial, if applicable (see Item 21a for data monitoring committee)                         | 13         |
| <b>Introduction</b>               |         |                                                                                                                                                                                                                                                                                          |            |
| Background and rationale          | 6a      | Description of research question and justification for undertaking the trial, including summary of relevant studies (published and unpublished) examining benefits and harms for each intervention                                                                                       | 3          |
|                                   | 6b      | Explanation for choice of comparators                                                                                                                                                                                                                                                    |            |
| Objectives                        | 7       | Specific objectives or hypotheses                                                                                                                                                                                                                                                        | 4          |
| Trial design                      | 8       | Description of trial design including type of trial (eg, parallel group, crossover, factorial, single group), allocation ratio, and framework (eg, superiority, equivalence, noninferiority, exploratory)                                                                                | 4          |

## Methods: Participants, interventions, and outcomes

|                      |     |                                                                                                                                                                                                                                                                                                                                                                                |          |
|----------------------|-----|--------------------------------------------------------------------------------------------------------------------------------------------------------------------------------------------------------------------------------------------------------------------------------------------------------------------------------------------------------------------------------|----------|
| Study setting        | 9   | Description of study settings (eg, community clinic, academic hospital) and list of countries where data will be collected. Reference to where list of study sites can be obtained                                                                                                                                                                                             | 4        |
| Eligibility criteria | 10  | Inclusion and exclusion criteria for participants. If applicable, eligibility criteria for study centres and individuals who will perform the interventions (eg, surgeons, psychotherapists)                                                                                                                                                                                   | 4, Table |
| Interventions        | 11a | Interventions for each group with sufficient detail to allow replication, including how and when they will be administered                                                                                                                                                                                                                                                     | 4, Table |
|                      | 11b | Criteria for discontinuing or modifying allocated interventions for a given trial participant (eg, drug dose change in response to harms, participant request, or improving/worsening disease)                                                                                                                                                                                 | 5        |
|                      | 11c | Strategies to improve adherence to intervention protocols, and any procedures for monitoring adherence (eg, drug tablet return, laboratory tests)                                                                                                                                                                                                                              | 10       |
|                      | 11d | Relevant concomitant care and interventions that are permitted or prohibited during the trial                                                                                                                                                                                                                                                                                  | -        |
| Outcomes             | 12  | Primary, secondary, and other outcomes, including the specific measurement variable (eg, systolic blood pressure), analysis metric (eg, change from baseline, final value, time to event), method of aggregation (eg, median, proportion), and time point for each outcome. Explanation of the clinical relevance of chosen efficacy and harm outcomes is strongly recommended | 5,6,     |
| Participant timeline | 13  | Time schedule of enrolment, interventions (including any run-ins and washouts), assessments, and visits for participants. A schematic diagram is highly recommended (see Figure)                                                                                                                                                                                               | 7        |
| Sample size          | 14  | Estimated number of participants needed to achieve study objectives and how it was determined, including clinical and statistical assumptions supporting any sample size calculations                                                                                                                                                                                          | 6        |
| Recruitment          | 15  | Strategies for achieving adequate participant enrolment to reach target sample size                                                                                                                                                                                                                                                                                            | 6        |

## Methods: Assignment of interventions (for controlled trials)

### Allocation:

|                     |     |                                                                                                                                                                                                                                                                                                                                                          |   |
|---------------------|-----|----------------------------------------------------------------------------------------------------------------------------------------------------------------------------------------------------------------------------------------------------------------------------------------------------------------------------------------------------------|---|
| Sequence generation | 16a | Method of generating the allocation sequence (eg, computer-generated random numbers), and list of any factors for stratification. To reduce predictability of a random sequence, details of any planned restriction (eg, blocking) should be provided in a separate document that is unavailable to those who enrol participants or assign interventions | 7 |
|---------------------|-----|----------------------------------------------------------------------------------------------------------------------------------------------------------------------------------------------------------------------------------------------------------------------------------------------------------------------------------------------------------|---|

|    |                                                           |     |                                                                          |      |
|----|-----------------------------------------------------------|-----|--------------------------------------------------------------------------|------|
| 1  |                                                           |     |                                                                          |      |
| 2  | Allocation                                                | 16b | Mechanism of implementing the allocation sequence (eg, central           |      |
| 3  | concealment                                               |     | telephone; sequentially numbered, opaque, sealed envelopes),             |      |
| 4  | mechanism                                                 |     | describing any steps to conceal the sequence until interventions are     |      |
| 5  |                                                           |     | assigned                                                                 |      |
| 6  |                                                           |     |                                                                          |      |
| 7  | Implementation                                            | 16c | Who will generate the allocation sequence, who will enrol participants,  | 7    |
| 8  |                                                           |     | and who will assign participants to interventions                        |      |
| 9  |                                                           |     |                                                                          |      |
| 10 | Blinding                                                  | 17a | Who will be blinded after assignment to interventions (eg, trial         | 7    |
| 11 | (masking)                                                 |     | participants, care providers, outcome assessors, data analysts), and     |      |
| 12 |                                                           |     | how                                                                      |      |
| 13 |                                                           | 17b | If blinded, circumstances under which unblinding is permissible, and     | 7    |
| 14 |                                                           |     | procedure for revealing a participant's allocated intervention during    |      |
| 15 |                                                           |     | the trial                                                                |      |
| 16 |                                                           |     |                                                                          |      |
| 17 |                                                           |     |                                                                          |      |
| 18 |                                                           |     |                                                                          |      |
| 19 |                                                           |     |                                                                          |      |
| 20 | <b>Methods: Data collection, management, and analysis</b> |     |                                                                          |      |
| 21 | Data collection                                           | 18a | Plans for assessment and collection of outcome, baseline, and other      | 7,8  |
| 22 | methods                                                   |     | trial data, including any related processes to promote data quality (eg, |      |
| 23 |                                                           |     | duplicate measurements, training of assessors) and a description of      |      |
| 24 |                                                           |     | study instruments (eg, questionnaires, laboratory tests) along with      |      |
| 25 |                                                           |     | their reliability and validity, if known. Reference to where data        |      |
| 26 |                                                           |     | collection forms can be found, if not in the protocol                    |      |
| 27 |                                                           | 18b | Plans to promote participant retention and complete follow-up,           | 7    |
| 28 |                                                           |     | including list of any outcome data to be collected for participants who  |      |
| 29 |                                                           |     | discontinue or deviate from intervention protocols                       |      |
| 30 |                                                           |     |                                                                          |      |
| 31 | Data                                                      | 19  | Plans for data entry, coding, security, and storage, including any       | 8,10 |
| 32 | management                                                |     | related processes to promote data quality (eg, double data entry;        |      |
| 33 |                                                           |     | range checks for data values). Reference to where details of data        |      |
| 34 |                                                           |     | management procedures can be found, if not in the protocol               |      |
| 35 |                                                           |     |                                                                          |      |
| 36 | Statistical                                               | 20a | Statistical methods for analysing primary and secondary outcomes.        | 8,9  |
| 37 | methods                                                   |     | Reference to where other details of the statistical analysis plan can be |      |
| 38 |                                                           |     | found, if not in the protocol                                            |      |
| 39 |                                                           | 20b | Methods for any additional analyses (eg, subgroup and adjusted           | 9    |
| 40 |                                                           |     | analyses)                                                                |      |
| 41 |                                                           | 20c | Definition of analysis population relating to protocol non-adherence     | 8    |
| 42 |                                                           |     | (eg, as randomised analysis), and any statistical methods to handle      |      |
| 43 |                                                           |     | missing data (eg, multiple imputation)                                   |      |
| 44 |                                                           |     |                                                                          |      |
| 45 |                                                           |     |                                                                          |      |
| 46 |                                                           |     |                                                                          |      |
| 47 |                                                           |     |                                                                          |      |
| 48 |                                                           |     |                                                                          |      |
| 49 |                                                           |     |                                                                          |      |
| 50 |                                                           |     |                                                                          |      |
| 51 |                                                           |     |                                                                          |      |
| 52 | <b>Methods: Monitoring</b>                                |     |                                                                          |      |
| 53 |                                                           |     |                                                                          |      |
| 54 | Data monitoring                                           | 21a | Composition of data monitoring committee (DMC); summary of its role      | 10   |
| 55 |                                                           |     | and reporting structure; statement of whether it is independent from     |      |
| 56 |                                                           |     | the sponsor and competing interests; and reference to where further      |      |
| 57 |                                                           |     | details about its charter can be found, if not in the protocol.          |      |
| 58 |                                                           |     | Alternatively, an explanation of why a DMC is not needed                 |      |
| 59 |                                                           |     |                                                                          |      |
| 60 |                                                           |     |                                                                          |      |



|    |                                 |     |                                                                                                                                                                                                                                                                                     |     |
|----|---------------------------------|-----|-------------------------------------------------------------------------------------------------------------------------------------------------------------------------------------------------------------------------------------------------------------------------------------|-----|
| 1  |                                 |     |                                                                                                                                                                                                                                                                                     |     |
| 2  |                                 | 21b | Description of any interim analyses and stopping guidelines, including who will have access to these interim results and make the final decision to terminate the trial                                                                                                             | 10  |
| 3  |                                 |     |                                                                                                                                                                                                                                                                                     |     |
| 4  |                                 |     |                                                                                                                                                                                                                                                                                     |     |
| 5  |                                 |     |                                                                                                                                                                                                                                                                                     |     |
| 6  | Harms                           | 22  | Plans for collecting, assessing, reporting, and managing solicited and spontaneously reported adverse events and other unintended effects of trial interventions or trial conduct                                                                                                   | 10  |
| 7  |                                 |     |                                                                                                                                                                                                                                                                                     |     |
| 8  |                                 |     |                                                                                                                                                                                                                                                                                     |     |
| 9  |                                 |     |                                                                                                                                                                                                                                                                                     |     |
| 10 |                                 |     |                                                                                                                                                                                                                                                                                     |     |
| 11 | Auditing                        | 23  | Frequency and procedures for auditing trial conduct, if any, and whether the process will be independent from investigators and the sponsor                                                                                                                                         | 10  |
| 12 |                                 |     |                                                                                                                                                                                                                                                                                     |     |
| 13 |                                 |     |                                                                                                                                                                                                                                                                                     |     |
| 14 |                                 |     |                                                                                                                                                                                                                                                                                     |     |
| 15 |                                 |     |                                                                                                                                                                                                                                                                                     |     |
| 16 | <b>Ethics and dissemination</b> |     |                                                                                                                                                                                                                                                                                     |     |
| 17 | Research ethics approval        | 24  | Plans for seeking research ethics committee/institutional review board (REC/IRB) approval                                                                                                                                                                                           | 11  |
| 18 |                                 |     |                                                                                                                                                                                                                                                                                     |     |
| 19 |                                 |     |                                                                                                                                                                                                                                                                                     |     |
| 20 | Protocol amendments             | 25  | Plans for communicating important protocol modifications (eg, changes to eligibility criteria, outcomes, analyses) to relevant parties (eg, investigators, REC/IRBs, trial participants, trial registries, journals, regulators)                                                    | 11  |
| 21 |                                 |     |                                                                                                                                                                                                                                                                                     |     |
| 22 |                                 |     |                                                                                                                                                                                                                                                                                     |     |
| 23 |                                 |     |                                                                                                                                                                                                                                                                                     |     |
| 24 |                                 |     |                                                                                                                                                                                                                                                                                     |     |
| 25 |                                 |     |                                                                                                                                                                                                                                                                                     |     |
| 26 | Consent or assent               | 26a | Who will obtain informed consent or assent from potential trial participants or authorised surrogates, and how (see Item 32)                                                                                                                                                        | 11  |
| 27 |                                 |     |                                                                                                                                                                                                                                                                                     |     |
| 28 |                                 |     |                                                                                                                                                                                                                                                                                     |     |
| 29 |                                 |     |                                                                                                                                                                                                                                                                                     |     |
| 30 |                                 | 26b | Additional consent provisions for collection and use of participant data and biological specimens in ancillary studies, if applicable                                                                                                                                               | yes |
| 31 |                                 |     |                                                                                                                                                                                                                                                                                     |     |
| 32 | Confidentiality                 | 27  | How personal information about potential and enrolled participants will be collected, shared, and maintained in order to protect confidentiality before, during, and after the trial                                                                                                | 8   |
| 33 |                                 |     |                                                                                                                                                                                                                                                                                     |     |
| 34 |                                 |     |                                                                                                                                                                                                                                                                                     |     |
| 35 |                                 |     |                                                                                                                                                                                                                                                                                     |     |
| 36 |                                 |     |                                                                                                                                                                                                                                                                                     |     |
| 37 | Declaration of interests        | 28  | Financial and other competing interests for principal investigators for the overall trial and each study site                                                                                                                                                                       | 14  |
| 38 |                                 |     |                                                                                                                                                                                                                                                                                     |     |
| 39 |                                 |     |                                                                                                                                                                                                                                                                                     |     |
| 40 | Access to data                  | 29  | Statement of who will have access to the final trial dataset, and disclosure of contractual agreements that limit such access for investigators                                                                                                                                     | 12  |
| 41 |                                 |     |                                                                                                                                                                                                                                                                                     |     |
| 42 |                                 |     |                                                                                                                                                                                                                                                                                     |     |
| 43 |                                 |     |                                                                                                                                                                                                                                                                                     |     |
| 44 |                                 |     |                                                                                                                                                                                                                                                                                     |     |
| 45 | Ancillary and post-trial care   | 30  | Provisions, if any, for ancillary and post-trial care, and for compensation to those who suffer harm from trial participation                                                                                                                                                       | 10  |
| 46 |                                 |     |                                                                                                                                                                                                                                                                                     |     |
| 47 |                                 |     |                                                                                                                                                                                                                                                                                     |     |
| 48 | Dissemination policy            | 31a | Plans for investigators and sponsor to communicate trial results to participants, healthcare professionals, the public, and other relevant groups (eg, via publication, reporting in results databases, or other data sharing arrangements), including any publication restrictions | 11  |
| 49 |                                 |     |                                                                                                                                                                                                                                                                                     |     |
| 50 |                                 |     |                                                                                                                                                                                                                                                                                     |     |
| 51 |                                 |     |                                                                                                                                                                                                                                                                                     |     |
| 52 |                                 |     |                                                                                                                                                                                                                                                                                     |     |
| 53 |                                 |     |                                                                                                                                                                                                                                                                                     |     |
| 54 |                                 | 31b | Authorship eligibility guidelines and any intended use of professional writers                                                                                                                                                                                                      | 11  |
| 55 |                                 |     |                                                                                                                                                                                                                                                                                     |     |
| 56 |                                 |     |                                                                                                                                                                                                                                                                                     |     |
| 57 |                                 | 31c | Plans, if any, for granting public access to the full protocol, participant-level dataset, and statistical code                                                                                                                                                                     | 11  |
| 58 |                                 |     |                                                                                                                                                                                                                                                                                     |     |
| 59 |                                 |     |                                                                                                                                                                                                                                                                                     |     |
| 60 |                                 |     |                                                                                                                                                                                                                                                                                     |     |

## Appendices

|                            |    |                                                                                                                                                                                                |            |
|----------------------------|----|------------------------------------------------------------------------------------------------------------------------------------------------------------------------------------------------|------------|
| Informed consent materials | 32 | Model consent form and other related documentation given to participants and authorised surrogates                                                                                             | Supplement |
| Biological specimens       | 33 | Plans for collection, laboratory evaluation, and storage of biological specimens for genetic or molecular analysis in the current trial and for future use in ancillary studies, if applicable | No         |

\*It is strongly recommended that this checklist be read in conjunction with the SPIRIT 2013 Explanation & Elaboration for important clarification on the items. Amendments to the protocol should be tracked and dated. The SPIRIT checklist is copyrighted by the SPIRIT Group under the Creative Commons "[Attribution-NonCommercial-NoDerivs 3.0 Unported](#)" license.

For peer review only

# BMJ Open

## Effect of milk protein content in toddler formula on later BMI and obesity risk: Protocol of the multicentre randomized controlled Toddler Milk Intervention (ToMI) trial

|                                 |                                                                                                                                                                                                                                                                                                                                                                                                                                                                                                                                                   |
|---------------------------------|---------------------------------------------------------------------------------------------------------------------------------------------------------------------------------------------------------------------------------------------------------------------------------------------------------------------------------------------------------------------------------------------------------------------------------------------------------------------------------------------------------------------------------------------------|
| Journal:                        | <i>BMJ Open</i>                                                                                                                                                                                                                                                                                                                                                                                                                                                                                                                                   |
| Manuscript ID                   | bmjopen-2020-048290.R2                                                                                                                                                                                                                                                                                                                                                                                                                                                                                                                            |
| Article Type:                   | Protocol                                                                                                                                                                                                                                                                                                                                                                                                                                                                                                                                          |
| Date Submitted by the Author:   | 16-Nov-2021                                                                                                                                                                                                                                                                                                                                                                                                                                                                                                                                       |
| Complete List of Authors:       | Grote, Veit; University Hospital Munich, Dr. von Hauner Children's Hospital<br>Jaeger, Vanessa; University Hospital Munich, Dr. von Hauner Children's Hospital<br>Escribano, Joaquin; Universitat Rovira i Virgili; Hospital Universitari Sant Joan de Reus<br>Zaragoza, Marta; Universitat Rovira i Virgili; Hospital Universitari de Tarragona Joan XXIII<br>Gispert, Mariona; Universitat Rovira i Virgili<br>Grathwohl, Dominik; Nestle Research Center<br>Koletzko, Berthold; University Hospital Munich, Dr. von Hauner Children's Hospital |
| <b>Primary Subject Heading</b>: | Paediatrics                                                                                                                                                                                                                                                                                                                                                                                                                                                                                                                                       |
| Secondary Subject Heading:      | Nutrition and metabolism                                                                                                                                                                                                                                                                                                                                                                                                                                                                                                                          |
| Keywords:                       | NUTRITION & DIETETICS, PAEDIATRICS, Other metabolic, e.g. iron, porphyria < DIABETES & ENDOCRINOLOGY                                                                                                                                                                                                                                                                                                                                                                                                                                              |
|                                 |                                                                                                                                                                                                                                                                                                                                                                                                                                                                                                                                                   |

SCHOLARONE™  
Manuscripts



I, the Submitting Author has the right to grant and does grant on behalf of all authors of the Work (as defined in the below author licence), an exclusive licence and/or a non-exclusive licence for contributions from authors who are: i) UK Crown employees; ii) where BMJ has agreed a CC-BY licence shall apply, and/or iii) in accordance with the terms applicable for US Federal Government officers or employees acting as part of their official duties; on a worldwide, perpetual, irrevocable, royalty-free basis to BMJ Publishing Group Ltd ("BMJ") its licensees and where the relevant Journal is co-owned by BMJ to the co-owners of the Journal, to publish the Work in this journal and any other BMJ products and to exploit all rights, as set out in our [licence](#).

The Submitting Author accepts and understands that any supply made under these terms is made by BMJ to the Submitting Author unless you are acting as an employee on behalf of your employer or a postgraduate student of an affiliated institution which is paying any applicable article publishing charge ("APC") for Open Access articles. Where the Submitting Author wishes to make the Work available on an Open Access basis (and intends to pay the relevant APC), the terms of reuse of such Open Access shall be governed by a Creative Commons licence – details of these licences and which [Creative Commons](#) licence will apply to this Work are set out in our licence referred to above.

Other than as permitted in any relevant BMJ Author's Self Archiving Policies, I confirm this Work has not been accepted for publication elsewhere, is not being considered for publication elsewhere and does not duplicate material already published. I confirm all authors consent to publication of this Work and authorise the granting of this licence.

1  
2 **Effect of milk protein content in toddler formula on later BMI and obesity risk: Protocol of the**  
3 **multicentre randomized controlled Toddler Milk Intervention (ToMI) trial**  
4

5  
6 Veit Grote<sup>1</sup>, Vanessa Jäger<sup>1</sup>, Joaquin Escribano<sup>2,3</sup>, Marta Zaragoza-Jordana<sup>2,4</sup>, Mariona  
7

8 Gispert-Llaurado<sup>2</sup>, Dominik Grathwohl<sup>5</sup>, Berthold Koletzko<sup>1</sup>  
9

10  
11  
12 <sup>1</sup>Div. Metabolic and Nutritional Medicine, Dept. of Paediatrics, Dr. von Hauner Children's  
13 Hospital, University Hospital, LMU – Ludwig-Maximilians-Universität Munich, Germany  
14

15  
16 <sup>2</sup>Universitat Rovira i Virgili, IISPV, Pediatric Nutrition and Human Development Research Unit,  
17 Spain  
18

19  
20 <sup>3</sup>Hospital Universitari Sant Joan de Reus, Spain  
21

22  
23 <sup>4</sup>Hospital Universitari de Tarragona Joan XXIII, Spain  
24

25  
26 <sup>5</sup>Nestlé Research, Lausanne, Switzerland  
27

28  
29  
30  
31  
32 Corresponding author:  
33

34 Prof. Dr. med. Berthold Koletzko, Dr. von Hauner Children's Hospital, Lindwurmstr. 4, 80337  
35

36 Munich, Germany. Email: Berthold.Koletzko@med.uni-muenchen.de  
37  
38  
39  
40  
41  
42  
43  
44  
45  
46  
47  
48  
49  
50  
51  
52  
53  
54  
55  
56  
57  
58  
59  
60

## Abstract

**Introduction** Reduction of milk protein content in infant formula provided during the first year of life has been shown to reduce early weight gain and obesity later in life. While rapid weight gain during the first two years of life is one of the strongest early predictors of obesity, the role of animal protein intake beyond the first year of life is unclear. The aim of this study is to examine the role of milk protein during the second year of life in healthy children on weight gain and obesity risk in preschool age.

**Methods and analysis** This randomized, double-blinded study enrolled 1,618 children aged 11.5 to 13.5 months in Spain and Germany into 2 groups receiving isocaloric toddler milk with differing protein content during the second year of life. The experimental formula contains 1.5g/100kcal and the control formula 6.15g/100kcal protein and otherwise equal formula composition, except for modified fat content to achieve equal energy density. The primary endpoint is BMI-for-age z-score at the age of 24 months adjusted for BMI at 12 months of age. The children are followed until 6 years of age.

**Ethics and dissemination** Ethics approval was obtained from the ethical committees of the LMU University Hospital Munich, Germany (Nr. 555-15) and at Institut d'Investigació Sanitaria Pere Virgili, Reus, Spain (Ref. CEIm IISPV 013/2016). We aim at publishing results in peer-reviewed journals and sharing of results with study participants.

**Trial registration number** NCT02907502

### Strengths and limitations of this study

- This study uses a randomized and double blinded design to minimize potential confounding and biases.
- The multicentre design of this study with sites in Spain and Germany increases external validity of study results.
- The follow-up of the cohort is planned until six years of age and will provide the possibility to examine long-term effects of the intervention.
- Conclusions will be limited to effects of dairy protein provided with milk based drinks in the second year of life and cannot be extrapolated to effects of total dietary protein supply.

**Keywords**

Toddler milk; milk protein; protein intake; clinical trial; obesity; BMI

For peer review only

## Introduction

A randomized double blind controlled clinical trial demonstrated that reducing protein intake in infant formula provided in the first year of life lowers early weight gain until 2 years of age<sup>1</sup>. Data from the same study (CHildhood Obesity Project [CHOP] trial) demonstrated that lower protein supply with formula fed in the first year of life also reduced BMI and obesity risk at school age<sup>2</sup>. The results of the CHOP trial contributed to enhanced promotion of breastfeeding and efforts in reducing the protein content in infant and follow-on formula<sup>3,4</sup>.

It remains unclear which child age period is most sensitive to a modified protein intake, and whether limiting protein intake during the second year of life would also achieve benefits for prevention of excessive weight gain and later obesity. Observational studies find a consistent association of later overweight and obesity with total protein intake and in particular of milk protein intake, not only during infancy but also during the preschool age<sup>5-9</sup>. A systematic review on the effects of dietary protein intake concluded that the first 2 years of life are the most sensitive time period<sup>10</sup>.

The untoward programming effect of a high early protein intake on later obesity risk has been linked to its effects on increasing plasma and tissue concentrations of insulinogenic amino acids, insulin and insulin-like growth factor 1 (IGF-1), which appear to induce a higher weight gain during the first 2 years of life as well as an enhanced adipogenic activity<sup>11</sup>. Such effects of an infant formula higher protein content on insulinogenic amino acids, insulin and IGF-1 levels have been shown in the double-blind randomized CHOP trial<sup>12-14</sup>.

Milk protein seems to play a key role in growth regulation during early childhood. Protein intake is the main contributor for nutritional regulation of the IGF-I axis<sup>15,16</sup>. Milk protein enhances serum IGF-1 to a greater extent than meat protein<sup>17</sup>. This might explain the more pronounced effect of milk protein compared to other proteins on the later risk of obesity that has been reported<sup>8</sup>.

Average protein intake of young children in Europe and other regions is much higher than metabolic requirements. During the second year of life, 30-50% of total daily protein is comprised of dairy products<sup>18,19</sup>, indicating particular opportunities to reduce overall protein consumption through modifying dairy protein intake.

Therefore, we designed a randomized controlled trial to examine the role of milk protein intake during the second year of life on child growth and later obesity risk. If a reduction of milk



1  
2 protein during the second year of life has an appreciable effect on growth and obesity  
3 development, respective dietary modification may be translated into the practice of toddler  
4 feeding.  
5  
6  
7

### 8 ***Main Objective***

9  
10 We aim at evaluating the effect of two iso-energetic milk products for young children with  
11 differing protein content on growth during the second year of life.  
12  
13  
14

### 15 ***Secondary Study Objectives***

16 Besides treating the study as an intervention study as described in detail below, the study  
17 incorporates a longer follow-up and is also considered a cohort study. Data obtained and  
18 produced should be scientifically exploited for explorative analysis specifically addressing the  
19 interplay and factors that influence child feeding, growth and development, physical activity,  
20 metabolism, and disease prevention.  
21  
22  
23  
24  
25  
26  
27

## 28 **Methods and analysis**

### 29 ***Study design and population***

30  
31 The Toddler Milk Intervention trial (ToMI trial) is designed as a two-arm, parallel, randomized,  
32 double blind controlled trial to evaluate toddler milk products with different protein content.  
33  
34 The study is conducted at university hospitals in Munich, Germany, and in Tarragona and Reus,  
35 Spain.  
36  
37  
38  
39

40  
41 The target population are healthy children at the age of one year. The children are enrolled if  
42 they meet the inclusion and exclusion criteria outlined in Table1.  
43  
44  
45

### 46 ***Intervention - formula composition***

47  
48 Two investigational formulas are used. Both formulas are based on cow's milk. The protein is  
49 unmodified from cow's milk and has the same casein:whey protein ratio in both formulas. The  
50 experimental formula contains 0.72g protein/100ml (1.5g/100 kcal), with a protein content that  
51 is similar to breast milk in advanced lactation. The control formula contains 2.95g  
52 protein/100ml (6.15g/100 kcal) which is comparable to standard 2% cows' milk. Contents of  
53 energy, carbohydrates, vitamins and minerals are very similar for both formulas (Table 2). In  
54 order to reach the same energy content in both formulas, the fat content varies between  
55  
56  
57  
58  
59  
60

1  
2 experimental (4.25g fat/100 kcal) and control formula (2.16g fat/100 kcal) but the lipid  
3 composition and the ratio of milk fat/vegetable oils is the same. Both formulas were developed  
4 and produced by the sponsor for this trial and were not tested in any other studies before the  
5 trial.  
6  
7  
8  
9

### 10 ***Dose, route of administration and schedule of formula***

11  
12 Participating families receive the formula as milk powder (one can comprises about 400g of  
13 product) and are advised to prepare the formula according to the instructions which were  
14 identical for all product codes. It is recommended to consume at least 300ml of formula per  
15 day. Further, parents are encouraged to substitute with the study formula any milk intake from  
16 the child's diet. The intake of other dairy products such as cheese or yoghurt is accepted.  
17  
18  
19  
20  
21

22 The intervention starts with the first study visit at around one year of age and ends with the  
23 third study visit at around two years of age. The study formula is given to the parents at no  
24 costs and is delivered directly to subject's home. Subject's compliance is regularly checked by  
25 telephone and personal interviews. After the end of the intervention, return and pick-up of  
26 remaining cans is organized. If not possible, families are advised to destroy remaining infant  
27 formula cans.  
28  
29  
30  
31  
32  
33

### 34 ***Discontinuation criteria***

35  
36 Discontinuation of the trial can be either due to withdrawal of consent at any time or due to  
37 the investigator's decision that continuation within the trial might impair child's health. All  
38 efforts will be undertaken to follow children irrespective of their study product consumption  
39 with all planned assessments.  
40  
41  
42  
43  
44

### 45 ***Primary endpoint***

46  
47 The primary endpoint is BMI-for-age z-score (based on the WHO Multicentre Growth  
48 Reference Study <sup>20</sup>) at the age of 24 months adjusted for BMI-for-age z-score at 12 months of  
49 age.  
50  
51  
52  
53

### 54 ***Secondary objectives and endpoints***

55  
56 The secondary objectives serve to evaluate the safety and efficacy of the two milk products  
57 used and to complement the primary endpoint. Secondary endpoints will also be adjusted for  
58 baseline measurements if available. Secondary endpoints are:  
59  
60

- BMI-for-age z-score at 72 months,
- The percentage of overweight and obese children at 24 months of age according to CDC definition: Overweight is at and above the 85th to less than 95th percentile and obese 95th percentile or greater
- The percentage of overweight and obese children at 72 months of age,
- Anthropometric measures (z-scores for weight, length and head, waist and arm circumference at 12, 18, 24, 48 and 72 months of age; hip circumference at 48 and 72 month of age),
- Subcutaneous fat distribution (from skinfold thickness at 24, 48 and 72 months of age),
- Total body fat and lean mass (from BodPod measurements at 24, 48 and 72 months of age),
- Blood pressure (48 and 72 month of age),
- Child development (24 and 48 months of age),
- Metabolic and endocrine markers (IGF-1, IGF-BP2, IGF-BP3, insulin, leptin, adiponectin, ghrelin, lipid profile and complete blood count at 12, 24 and 72 month of age),
- Serum albumin, urea, creatinine, amino acids at 12, 24, 72 months of age and ferritin and 25-OH-vitamin D (at 24 months of age),
- Metabolic profile (from plasma at 12, 24 and 72 months of age and from urine samples at 12, 18, 24, 48 and 72 months of age),
- Urine markers (Calcium, C-peptide, creatinine urea nitrogen at 12, 18, 24, 48 and 72 months of age),

Furthermore, the following hypotheses will be examined:

- Total energy intake is not affected by the low protein formula.
- Total protein intake is lower in the group of protein reduced formula.
- Plasma concentrations of essential amino acids and of IGF-1 at the age of 24 months are lower in the low protein formula group compared to the high protein formula group.
- Systolic and diastolic blood pressure measurements at the ages of 48 and 72 months are lower in the low protein formula group compared to the high protein formula group.
- Body fat mass at age 24 months is lower in the low protein formula group compared to the high protein formula group.

- 1
- 2 - DNA methylation affects the association of protein intake and BMI
- 3
- 4 - Protein intake affects DNA methylation
- 5
- 6 - DNA methylation affects the association of protein intake and the metabolic profile
- 7

8 DNA methylation is currently only planned as an option provided additional funding can be  
9 secured.

### 11 **Sample size**

12  
13 The sample size calculation is based on the observations from the CHOP-study <sup>1</sup>. This trial  
14 examined the difference in BMI-for-age z-scores between two groups of children fed a higher  
15 or lower protein content formula during the first year of life. At 24 months of age the BMI for  
16 age z-score difference between both formula groups was 0.2 standard deviations (SD). The  
17 absolute difference in protein content between intervention and control group in the CHOP-  
18 trial was lower (Infant formula: 0.8g/100ml; Follow-on formula: 1.6g/100ml) compared to the  
19 ToMI-trial (2.2g/100ml). Despite a higher protein difference, we expect a lower effect of the  
20 intervention due to the lower contribution of milk to the total protein intake in the second year  
21 of life. Thus, we assume a slightly lower mean difference in BMI for age z-score of 0.15 SD at  
22 24 months of life.

23  
24 The sample size was calculated with an anticipated effect size on BMI for age z-score of 0.15  
25 SD and a standard deviation of 0.9. Assuming a power of 80 % and a significance level of 5%  
26 (two-sided alpha of 0.05), a sample size of 566 subjects per intervention arm is calculated.  
27 Therefore, 1,132 subjects in total are needed. To have enough power to detect also a difference  
28 of the same magnitude at 72 months (6 years) of age, at an assumed loss to follow-up of 30%,  
29 a final sample size of 1,618 subjects was estimated.

### 31 **Recruitment**

32  
33 The study sites in Munich, Reus and Tarragona followed somewhat different recruitment  
34 strategies due to different local conditions. In Germany all inhabitants are registered in central  
35 registries. The public registries provided the study team for this defined research on a regular  
36 basis addresses of all families with children in the required age group (about 26,000 per year).  
37 These families living in Munich and about 70 surrounding municipalities were contacted once  
38 by postal mail and invited to contact the study team if interested in participation in the trial.

1  
2 In Spain two recruitment strategies were used for both sites covering about 3000 births per  
3 year. First, telephone contacts from families who delivered their child at either of the two  
4 hospitals were available. These families were contacted directly. Second, recruitment interviews  
5 at primary health care centers were conducted. In these primary health care centers, Spanish  
6 children are seen for health care examinations and for vaccinations.  
7  
8  
9  
10

### 11 ***Allocation of study formula and blinding***

12  
13 The study formula cans are labelled with one of eight codes. Four codes each are assigned to  
14 the intervention or the control group, respectively. The allocation of the codes is performed  
15 online by study staff after check of in- and exclusion criteria within the data capture tool  
16 (iMedidata, Medidata Balance, New York, USA) using balanced randomization stratified by  
17 country. After enrolment of the subject into the trial, study staff dispense the assigned study  
18 formula to the study participant along with instructions for formula preparation.  
19  
20  
21  
22  
23  
24

25  
26 The study is double blinded with all persons involved in local organization and conduct of the  
27 study such as study staff, principal investigator, project manager, biostatistician, data manager,  
28 trial monitor and laboratory analysts being unaware of the code allocation. After the code  
29 break for the primary outcome analysis, subjects will receive a new identification id in the  
30 analysis data to hamper the unblinding for above persons in the further follow-up. An  
31 emergency code break by an Investigator may be requested only in case of an unexpected  
32 serious adverse event (SAE) suspected to be related to the investigational product.  
33  
34  
35  
36  
37  
38  
39

### 40 ***Data collection and management***

41  
42 During the intervention period three visits at the hospital are scheduled at 12, 18 and 24  
43 months of age (Figure 1). At baseline socioeconomic data and data on health, growth and  
44 nutrition by 24-hours recalls during the first year of life are assessed. At each visit  
45 anthropometric measurements are performed and urine samples are collected. Blood is taken  
46 at 12 and 24 months of age. Additionally, at 24 months of age body composition using an air  
47 displacement plethysmography (BodPod COSMED, Rome, Italy) as well as physical activity  
48 measurement using an accelerometer device (Actigraph wGT3X-BT, Pensacola, FL, USA) is  
49 performed. Further, data of child's development based on parent answers of the Ages & Stages  
50 questionnaire (ASQ-3, Brookes Publishing Co., Inc., USA) are collected.  
51  
52  
53  
54  
55  
56  
57  
58  
59  
60

1  
2 For follow-up, two additional visits are scheduled at 48 and 72 months of age with  
3 anthropometric, body composition and physical activity measurements and collection of urine  
4 samples and food frequency questionnaires (Eating Habits Questionnaire -EHQ)<sup>21</sup>.  
5  
6 Furthermore, socioeconomic data and data on health are updated and data on nutrition  
7 behavior is collected. At 48 months of age, the ASQ-3 is used again. Blood is taken at 72 months  
8 of age.  
9  
10  
11  
12

13 The main primary aim of the nutritional assessment during the intervention phase is to see if  
14 the intervention groups differ in nutritional intake. Therefore, a 24h-recall is used. While the  
15 second year of life is still considered a nutritional transition period, nutrition patterns are more  
16 stable between 48 and 72 months of age and analysis of food patterns are more relevant.  
17 Therefore, a FFQ is used for the later time points.  
18  
19  
20  
21  
22

23 During all study visits and at several additional telephone calls between visits, parents are asked  
24 for health problems (including adverse events) and compliance. For compliance the intake of  
25 study milk and any discontinuation of study milk intake with reasons are determined. The  
26 number of consumed cans will be used to determine the average study milk consumption.  
27  
28  
29  
30

31 Collected data is organized in different databases. To organize and document all contacts with  
32 study participants and to coordinate the shipment of the study product, a web-based  
33 participant management tool is used (developed jointly with MedSciNet AB, Stockholm,  
34 Sweden). In this database, personal data is saved and stored on a secured data server. This  
35 database is separated from the other databases which store all medical, nutritional and  
36 laboratory data.  
37  
38  
39  
40  
41

42 All collected health data are primarily captured on paper except data from questionnaires on  
43 physical activity and food frequency questionnaires that are entered by families using  
44 LimeSurvey (LimeSurvey GmbH, Hamburg, Germany). All other data are transferred from paper  
45 into web-based databases. Nutritional data from 24-hours recalls are entered into Nutritics  
46 (NUTRITICS LTD, Dublin, Ireland) with nutritional information from the German nutritional  
47 database BLS 3.02 and complemented with the nutritional composition from a variety of  
48 commercial infant foods and local foods, obtained directly from the label, producer websites  
49 or local food composition databases. All other data are entered into iMedidata (New York,  
50 USA).  
51  
52  
53  
54  
55  
56  
57  
58  
59  
60

1  
2 Laboratory samples are processed according to a laboratory SOP. In general, aliquots have 2D  
3 barcodes, are scanned, linked with the subject ID and stored into 96-well racks at -80°C for  
4 later analysis. Only blood count, lipid status and HbA1c are measured locally on the day of  
5 blood sampling.  
6  
7  
8

9  
10 To ensure data quality, study staff is trained in regular intervals, and procedures are harmonized  
11 among study centers by regular contact and monitoring. Furthermore, anthropometric  
12 measurements are performed at least twice and data entry is strictly checked for consistency  
13 and plausibility by the monitor. Standard operating procedures for all measurements are in  
14 place; anthropometric measurements are based on the WHO Growth Standards study <sup>20</sup>.  
15  
16  
17  
18

### 19 **Statistical methods**

20  
21 A statistical analysis plan is created before final code break for the analysis of primary and  
22 secondary outcomes. For the statistical analysis, the full analysis dataset (FAS) and the per-  
23 protocol-dataset (PP) will be considered. The FAS comprises all randomized subjects who  
24 consumed at least one can of investigational product and was considered reasonable and as  
25 close as possible to the intention to treat (ITT) ideal as we dealt with a healthy population that  
26 participated not for treatment reasons. The PP comprises all subjects included in the FAS  
27 and that were compliant with the aimed product consumption (mean consumption of the  
28 recommended daily minimum amount of investigational product of 300ml/d). Compliance will  
29 be primarily assessed by the number of tins used by the study subject. A Blind Data Review  
30 Meeting with participants of the sponsor and the investigators will define specific rules and  
31 definitions for lack of compliance. No imputation of missing values is foreseen.  
32  
33  
34  
35  
36  
37  
38  
39  
40  
41

42  
43 The primary endpoint will be analyzed in the FAS by linear regression (ANCOVA) and corrected  
44 for BMI-for-age z-score at baseline, study center and gender. The results of the final model will  
45 be compared to further adjusted models and analysis in the PP group; possible effect  
46 modification of the primary outcome will be also considered.  
47  
48  
49

50  
51 Secondary analyses supporting primary objective:

- 52  
53 1. BMI-for-age z-score at 72 months.
- 54  
55 2. The percentage of overweight and obese children at 24 months of age according to  
56 CDC definition: Overweight at and above the 85th to less than 95th percentile and  
57 obese 95th percentile or greater.  
58  
59  
60

1  
2 3. The percentage of overweight and obese children at 72 months of age.  
3

4 In order to control the experiment wise false positive rate, the listed hierarchy (primary –  
5 secondary endpoints) will be maintained in interpreting these outcomes. The incidence of  
6 overweight and obese children at 24 and 72 months of age shall be also estimated according  
7 to International Obesity Task Force IOTF definition<sup>22</sup>. The percentage of overweight and obese  
8 children will be analyzed by the method of O. Sauzet, et al.<sup>23</sup>  
9

10  
11  
12  
13  
14 Secondary endpoints include anthropometric measures, dietary and biochemical data. We will  
15 use z-scores of WHO growth standards for anthropometry measures at months 12, 18, 24, and  
16 48. We will use a likelihood-ratio test to examine if there is a longitudinal treatment effect.  
17 Additionally, treatment differences at each visit will be analyzed using ANCOVA. The ANCOVA  
18 approach was chosen so that treatment differences and p-value do not depend on the stage  
19 of analysis. A further supportive analysis with a mixed linear model shall be performed at 6  
20 years of age. Fixed effects shall be the intervention group, age, gender, and a two-way  
21 interaction between child age and intervention group will be included. The random effects shall  
22 be a random intercept and slope.  
23

24  
25 Dietary data is collected by 24-hours recalls or food frequency questionnaires, which allow us  
26 to test for differences in macronutrient intake using ANCOVA. Hence, we are able to analyze if  
27 subjects change their dietary habits over time.  
28

29  
30 Biochemical data is often log-normal distributed. In order to analyze this kind of data properly,  
31 we will log-transform the data to achieve approximately normal distributed residuals.  
32

33  
34  
35  
36  
37  
38  
39  
40  
41  
42 ***Interim Analysis***

43  
44 To ensure safety of the intervention, an interim analysis is planned when 260 subjects have  
45 completed the intervention (at 24 months of age). Non-inferiority for weight-for-age z-score  
46 has to be shown. This must be the case in both FAS and PP. A non-inferiority boundary for  
47 weight-for-age z-score of minus 0.5 SD was chosen according to Onyango et al.<sup>24</sup>. The same  
48 model as for the primary analysis is used. To demonstrate non-inferiority, the lower bound of  
49 the two-sided 95% confidence interval of the model based treatment difference must be larger  
50 than the non-inferiority margin.  
51

52  
53  
54  
55  
56  
57 If non-inferiority is shown, the study is continued as planned. Otherwise, a second stage interim  
58 analysis is performed including the first 390 subjects who have completed the intervention.  
59  
60



1  
2 Furthermore, the safety evaluation will consider endpoints including adverse events,  
3 anthropometry, laboratory data and protein intake. Based on the results of the interim analysis  
4 and in accordance with the charter of the Data Monitoring Committee, the DMC will  
5 recommend either continuing the study as planned or performing the second stage interim  
6 analysis. The DMC is independent and consists of expert clinicians and statisticians with no  
7 competing interest. The planned interim safety analysis took place in June 2018 and no safety  
8 concerns were detected.

9  
10 Besides the interim analysis, safety is continuously observed by blinded online monitoring of  
11 individual growth curves based on the WHO growth charts. If a considerable number of  
12 subjects drop below the median growth curve, an interim analysis will be initiated and the DMC  
13 will review unblinded data.

### 24 **Harms**

25  
26 Any adverse events (AE) which lead to an untoward medical occurrence except for diagnostic  
27 and therapeutic non-invasive and invasive procedures will be recorded during the entire  
28 intervention period until 30 days after last study milk intake. After these 30 days, only AE's  
29 which are related to the intervention treatment will be recorded. Each AE will be rated  
30 according to its severity and its relationship to the study milk. Additionally, severe adverse  
31 events (SAE) which e.g. requires inpatient hospitalization will be reported to the safety manager  
32 within 24 hours after notice and will be followed up until the outcome is known. A participant  
33 insurance is in place.

### 41 **Monitoring**

42  
43 A commercial monitoring company reviews the process, AE reporting, data capturing and  
44 corresponding source data on a regular basis to ensure protocol compliance, accuracy and  
45 completeness.

### 50 **Protocol versions**

51  
52 Issue date: 15.09.2020; version identifier: 5; number of protocol amendments: 5; initial version:  
53 9 March 2016. First modification: 30 March 2016. Besides adaptation from requests of both  
54 ethical committees before the start of the study and several minor changes due to  
55 misspecifications in the protocol, several clarifications were needed, e.g. to provide more clarity  
56 and criteria for study termination before regular completion of the study, clarification in the

1  
2 statistical interpretation of secondary endpoints, addition of new secondary endpoints physical  
3 activity and HbA1c, the adaptation to the new European data protection rules in 2018, and a  
4 change in exclusion criteria to allow the inclusion of children that are breastfed once per day.  
5  
6 Furthermore, an extensive specification of the safety interim analysis after inclusion of 260  
7 children was added in 2018 and more details for collection of AEs separating the collection into  
8 two periods, during and after the intervention, were provided.  
9  
10  
11  
12  
13

### 14 ***Ethical considerations***

15  
16 This study is conducted in compliance with the International Conference on Harmonization  
17 (ICH) guidelines and the Declaration of Helsinki and complies with Good Clinical Practice  
18 guidelines. Ethics approval was obtained from the ethical committees of the university hospitals  
19 at the Ludwig-Maximilian University in Munich, Germany (Projekt Nr. 555-15) and at the Institut  
20 d'Investigació Sanitaria Pere Virgili, Reus, Spain (Ref. CEIm IISPV 013/2016. All protocol  
21 amendments were and will be approved by the ethical committee prior to implementation. All  
22 procedures and databases were approved by the local data protection agent and are in line  
23 with local and EU general data protection regulations.  
24  
25  
26  
27  
28  
29  
30

31 Written informed consent is collected by study staff from all legal guardians prior to study  
32 inclusion in adherence with regulatory requirements with additional consent for genetic  
33 analysis. Each subject receives oral as well as written informed consent in plain language with  
34 adequate time in advance to make an informed decision about study participation. The latest  
35 informed consent form for both study sites is enclosed in the online supplementary  
36 (Supplementary file). All participants re-consented for any additional measurement added to  
37 the protocol.  
38  
39  
40  
41  
42  
43  
44

### 45 ***Patient and Public Involvement***

46 The study protocol was primarily developed at a public university hospital without involvement  
47 of the sponsor. There was no further public or patient involvement.  
48  
49  
50  
51

### 52 ***Public dissemination and data availability***

53 Study results will be published in peer-reviewed journals and presented on national and  
54 international conferences. Study results will also be communicated to participants. Results will  
55 be written-up and published by the investigators without help of professional writers.  
56  
57  
58  
59  
60 Authorship will depend on relevant contribution to the study. Investigators have full research

1  
2 freedom and have full access to all data. The full study protocol will be made available upon  
3  
4 request. The participant-level dataset is not currently planned to be available because consent  
5  
6 was not obtained for the sharing of such data from participant's parents / legal guardians or  
7  
8 the Institutional Ethics Committees.  
9

### 10 ***Trial status and time course of the trial***

11  
12 The study started to recruit subjects in September 2016 and finished recruitment of 1,625  
13  
14 children in October 2019. The intervention phase will last until October 2020. The database  
15  
16 closure for the analysis of the primary outcome is planned for the first quarter of 2021. The  
17  
18 follow-up will be completed around October 2025.  
19

### 20 ***Funding, role of the sponsor and investigators***

21  
22 The sponsor has allocated a fixed budget for each study center to recruit and follow the  
23  
24 subjects. The sponsor is producing the study product and distributes the study product to the  
25  
26 study subjects. The sponsor is funding the monitoring of the study. The primary protocol was  
27  
28 outlined by the investigators and was jointly further developed by investigators and sponsor.  
29  
30 Data management will be primarily done by the sponsor, except parts of the compliance  
31  
32 checks, checks of biosamples and body composition data, as well as nutritional and physical  
33  
34 activity data. The primary analysis will be performed by the sponsor. The investigators have to  
35  
36 approve the statistical analysis plan and will have full access to all the data. Any published  
37  
38 interpretation of the data has to be in mutual agreement between sponsor and investigator  
39  
40 without hampering the research freedom of the investigators. The urinary metabolic profile will  
41  
42 be performed by the sponsor, all other laboratory measurements by the investigators. BK is the  
43  
44 coordinating principal investigator with VG being his deputy, JE is principal investigator in  
45  
46 Spain.  
47

### 48 ***Authors' Statement***

49  
50 VG and VJ wrote the manuscript. VG and BK provided the original outline of the protocol; JE,  
51  
52 MZ, MG, and DG participated in the design and set-up of the study. BK, JE, MZ, MG, and DG  
53  
54 critically revised the content of the original protocol and the manuscript.  
55  
56  
57  
58  
59  
60

**Funding statement**

This study is sponsored by Societ  de Produits Nestl  S.A., Switzerland (Avenue Nestl  55, CH-1800 Vevey) – formerly named Nestec. The work of VG, VJ and BK is/was financially supported in part by the European Commission H2020 Programme Lifecycle-733206, the European Joint Programming Initiative Project NutriPROGRAM, the German Ministry of Education and Research, Berlin (Grant Nr. 01 GI 0825), the German Research Council (Ko912/12-1 and INST 409/224-1 FUGG).

**Conflict of interest**

The institutions of VG, VJ, BK, JE, MZ, MG receive funding by the sponsor to conduct the study and DG is employed by the sponsor of the study.

## References

1. Koletzko B, von Kries R, Closa R, et al. Lower protein in infant formula is associated with lower weight up to age 2 y: a randomized clinical trial. *Am J Clin Nutr* 2009;89(6):1836-45. doi: 10.3945/ajcn.2008.27091
2. Weber M, Grote V, Closa-Monasterolo R, et al. Lower protein content in infant formula reduces BMI and obesity risk at school age: follow-up of a randomized trial. *Am J Clin Nutr* 2014;99(5):1041-51. doi: 10.3945/ajcn.113.064071
3. Koletzko B, Demmelmair H, Grote V, et al. Optimized protein intakes in term infants support physiological growth and promote long-term health. *Semin Perinatol* 2019;43(7):151153. doi: 10.1053/j.semperi.2019.06.001
4. European Commission. COMMISSION DELEGATED REGULATION (EU) 2016/128 of 25 September 2015 supplementing Regulation (EU) No 609/2013 of the European Parliament and of the Council as regards the specific compositional and information requirements for food for special medical purposes. *Official Journal of the European Union* 2016;L25/30 doi: [http://data.europa.eu/eli/reg\\_del/2016/128/oj](http://data.europa.eu/eli/reg_del/2016/128/oj)
5. Parizkova J, Rolland-Cachera MF. High proteins early in life as a predisposition for later obesity and further health risks. *Nutrition* 1997;13(9):818-9.
6. Karaolis-Danckert N, Gunther AL, Kroke A, et al. How early dietary factors modify the effect of rapid weight gain in infancy on subsequent body-composition development in term children whose birth weight was appropriate for gestational age. *Am J Clin Nutr* 2007;86(6):1700-08. doi: 86/6/1700 [pii] [published Online First: 2007/12/11]
7. Gunther AL, Buyken AE, Kroke A. Protein intake during the period of complementary feeding and early childhood and the association with body mass index and percentage body fat at 7 y of age. *Am J Clin Nutr* 2007;85(6):1626-33.
8. Günther ALB, Remer T, Kroke A, et al. Early protein intake and later obesity risk: which protein sources at which time points throughout infancy and childhood are important for body mass index and body fat percentage at 7 y of age? *Am J Clin Nutr* 2007;86(6):1765-72.
9. Ohlund I, Hernell O, Hornell A, et al. BMI at 4 years of age is associated with previous and current protein intake and with paternal BMI. *Eur J Clin Nutr* 2010;64(2):138-45. doi: 10.1038/ejcn.2009.132 [published Online First: 2009/11/12]
10. Hornell A, Lagstrom H, Lande B, et al. Protein intake from 0 to 18 years of age and its relation to health: a systematic literature review for the 5th Nordic Nutrition Recommendations. *Food Nutr Res* 2013;57 doi: 10.3402/fnr.v57i0.21083 [published Online First: 2013/05/30]
11. Koletzko B, von Kries R, Closa Monasterolo R, et al. Infant feeding and later obesity risk. In: Koletzko B, Desci T, Molnár D, et al., eds. *Early Nutrition Programming and Health Outcomes in Later Life*. Houten, Netherlands: Springer Netherlands 2009:15-29.
12. Rzehak P, Grote V, Lattka E, et al. Associations of IGF-1 gene variants and milk protein intake with IGF-I concentrations in infants at age 6months — Results from a randomized clinical trial. *Growth Horm IGF Res* 2013;23(5):149-58. doi: 10.1016/j.ghir.2013.05.002 [published Online First: 2013/06/27]
13. Socha P, Grote V, Gruszfeld D, et al. Milk protein intake, the metabolic-endocrine response, and growth in infancy: data from a randomized clinical trial. *Am J Clin Nutr* 2011;94(6 Suppl):1776S-84S. doi: 10.3945/ajcn.110.000596 [published Online First: 2011/08/19]

- 1
  - 2
  - 3
  - 4
  - 5
  - 6
  - 7
  - 8
  - 9
  - 10
  - 11
  - 12
  - 13
  - 14
  - 15
  - 16
  - 17
  - 18
  - 19
  - 20
  - 21
  - 22
  - 23
  - 24
  - 25
  - 26
  - 27
  - 28
  - 29
  - 30
  - 31
  - 32
  - 33
  - 34
  - 35
  - 36
  - 37
  - 38
  - 39
  - 40
  - 41
  - 42
  - 43
  - 44
  - 45
  - 46
  - 47
  - 48
  - 49
  - 50
  - 51
  - 52
  - 53
  - 54
  - 55
  - 56
  - 57
  - 58
  - 59
  - 60
14. Kirchberg FF, Harder U, Weber M, et al. Dietary protein intake affects amino acid and acylcarnitine metabolism in infants aged 6 months. *J Clin Endocrinol Metab* 2015;100(1):149-58. doi: 10.1210/jc.2014-3157
15. Ketelslegers JM, Maiter D, Maes M, et al. Nutritional regulation of insulin-like growth factor-I. *Metabolism: Clinical and Experimental* 1995;44(10 Suppl 4):50-7. [published Online First: 1995/10/01]
16. Thissen JP, Ketelslegers JM, Underwood LE. Nutritional regulation of the insulin-like growth factors. *Endocr Rev* 1994;15(1):80-101. doi: 10.1210/edrv-15-1-80 [published Online First: 1994/02/01]
17. Hoppe C, Molgaard C, Dalum C, et al. Differential effects of casein versus whey on fasting plasma levels of insulin, IGF-1 and IGF-1/IGFBP-3: results from a randomized 7-day supplementation study in prepubertal boys. *Eur J Clin Nutr* 2009;63(9):1076-83. doi: 10.1038/ejcn.2009.34 [published Online First: 2009/05/28]
18. Hilbig A, Kersting M. Effects of age and time on energy and macronutrient intake in German infants and young children: results of the DONALD study. *J Pediatr Gastroenterol Nutr* 2006;43(4):518-24. doi: 10.1097/01.mpg.0000229548.69702.aa [published Online First: 2006/10/13]
19. Damianidi L, Gruszfeld D, Verduci E, et al. Protein intakes and their nutritional sources during the first 2 years of life: secondary data evaluation from the European Childhood Obesity Project. *Eur J Clin Nutr* 2016;70(11):1291-97. doi: 10.1038/ejcn.2016.108
20. de Onis M, Onyango AW, Van den Broeck J, et al. Measurement and standardization protocols for anthropometry used in the construction of a new international growth reference. *Food Nutr Bull* 2004;25(1 Suppl):S27-36.
21. Pala V, Reisch LA, Lissner L. Dietary Behaviour in Children, Adolescents and Families: The Eating Habits Questionnaire (EHQ). In: Bammann K, Lissner L, Pigeot I, et al., eds. Instruments for Health Surveys in Children and Adolescents. Cham: Springer Nature Switzerland 2019:103-33.
22. Cole TJ. Establishing a standard definition for child overweight and obesity worldwide: international survey. *BMJ* 2000;320(7244):1240-40. doi: 10.1136/bmj.320.7244.1240
23. Sauzet O, Rehse J, Breiding JH. DistdichoR a R Package for the distributional dichotomisation of continuous outcomes arXiv:1809.03279, 2018.
24. Onyango AW, de Onis M, Caroli M, et al. Field-testing the WHO child growth standards in four countries. *J Nutr* 2007;137(1):149-52. doi: 10.1093/jn/137.1.149 [published Online First: 2006/12/22]

## Tables

Table 1: Inclusion and Exclusion criteria of the Tomi trial

| Inclusion criteria                                                                                                                                                                                                                                                                                                                                                                                                                                                                                                                                                                                                                                                                                                                                                     | Exclusion criteria                                                                                                                                                                                                                                                                                                                                                                                                                                                                                                                                                       |
|------------------------------------------------------------------------------------------------------------------------------------------------------------------------------------------------------------------------------------------------------------------------------------------------------------------------------------------------------------------------------------------------------------------------------------------------------------------------------------------------------------------------------------------------------------------------------------------------------------------------------------------------------------------------------------------------------------------------------------------------------------------------|--------------------------------------------------------------------------------------------------------------------------------------------------------------------------------------------------------------------------------------------------------------------------------------------------------------------------------------------------------------------------------------------------------------------------------------------------------------------------------------------------------------------------------------------------------------------------|
| <ul style="list-style-type: none"> <li>• Legal guardians signed the written informed consent.</li> <li>• Child was born full term (<math>\geq 37 + 0</math> weeks of gestation).</li> <li>• Child's birth weight is between 2.5 and 4.5 kg.</li> <li>• Child is born from a singleton pregnancy.</li> <li>• Child's age at enrolment is between 11.5 and 13.5 month.</li> <li>• Child's legal guardians are of legal age and they have sufficient local language skills to understand the study information, informed consent and study procedure.</li> <li>• Child and child's parents are willing to fulfil the requirements of the study protocol and procedures.</li> <li>• Child's family is available via phone or e-mail throughout the whole study.</li> </ul> | <ul style="list-style-type: none"> <li>• Infant who is breastfed at least twice in 24 hours at time of enrolment.</li> <li>• Infant who usually does not drink 300 ml of cow's milk and/or formula milk per day.</li> <li>• Cow's milk allergy.</li> <li>• Lactose intolerance.</li> <li>• Institutionalized children.</li> <li>• Diagnosed disorder, which interfere with nutrition or growth (e.g. celiac disease, inflammatory bowel disease).</li> <li>• Children who participated in any other interventional clinical trial 4 weeks prior to enrolment.</li> </ul> |

Table 2: Nutritional composition of the interventional products (toddler milks) that are based on cow's milk with the same casein:whey protein ratio.

|                       | <b>Experimental toddler milk</b><br>(as prepared, per 100ml) | <b>Control toddler milk</b><br>(as prepared, per 100ml) |
|-----------------------|--------------------------------------------------------------|---------------------------------------------------------|
| Energy                | 201 KJ/48 kcal                                               | 201 KJ/48 kcal                                          |
| Protein               | 0.72 g                                                       | 2.95 g                                                  |
| Fat                   | 2.0 g                                                        | 1.0 g                                                   |
| Saturated fatty acids | 0.8 g                                                        | 0.4 g                                                   |
| Carbohydrates         | 6.7 g                                                        | 6.7 g                                                   |
| Lactose               | 6.7 g                                                        | 6.6 g                                                   |
| Other                 | <0.1 g                                                       | <0.1 g                                                  |
| Salt                  | 0.1 g                                                        | 0.1 g                                                   |
| Vitamines             |                                                              |                                                         |
| Vitamine A            | 71 µg                                                        | 66 µg                                                   |
| Vitamine D            | 1.2 µg                                                       | 1.3 µg                                                  |
| Folic acid            | 14.9 µg                                                      | 14.2 µg                                                 |
| Vitamine B12          | 0.2 µg                                                       | 0.2 µg                                                  |
| Vitamine C            | 6.4 mg                                                       | 6.9 mg                                                  |
| Minerals              |                                                              |                                                         |
| Calcium               | 115 mg                                                       | 115 mg                                                  |
| Micronutrients        |                                                              |                                                         |
| Iron                  | 0.5 mg                                                       | 0.5 mg                                                  |
| Zinc                  | 0.3 mg                                                       | 0.6 mg                                                  |



1  
2  
3  
4 *Figure 1: Assessments in children participating in the ToMI trial*  
5  
6  
7  
8  
9  
10  
11  
12  
13  
14  
15  
16  
17  
18  
19  
20  
21  
22  
23  
24  
25  
26  
27  
28  
29  
30  
31  
32  
33  
34  
35  
36  
37  
38  
39  
40  
41  
42  
43  
44  
45  
46  
47  
48  
49  
50  
51  
52  
53  
54  
55  
56  
57  
58  
59  
60

For peer review only

1  
2  
3  
4  
5  
6  
7  
8  
9  
10  
11  
12  
13  
14  
15  
16  
17  
18  
19  
20  
21  
22  
23  
24  
25  
26  
27  
28  
29  
30  
31  
32  
33  
34  
35  
36  
37  
38  
39  
40  
41  
42  
43  
44  
45  
46  
47  
48  
49  
50  
51  
52  
53  
54  
55  
56  
57  
58  
59  
60

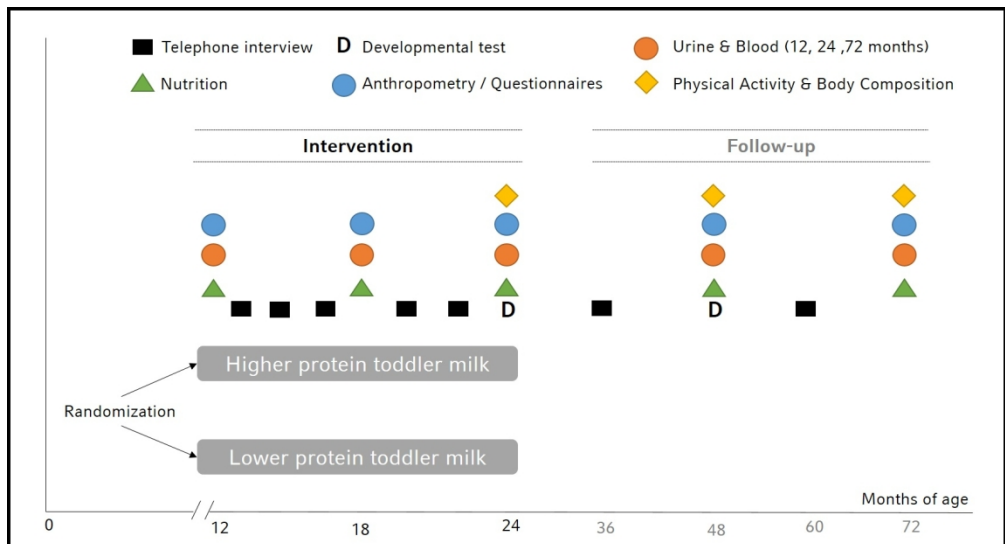

Assessments in children participating in the ToMI trial

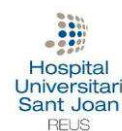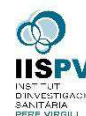

## INFORMACIÓN A LOS PARTICIPANTES

|                 |                                                                                                                                                  |
|-----------------|--------------------------------------------------------------------------------------------------------------------------------------------------|
| <b>TÍTULO</b>   | Efecto de la ingesta de proteínas lácteas en el niño pequeño sobre el crecimiento y el posterior riesgo de obesidad: ensayo clínico aleatorizado |
| <b>ACRÓNIMO</b> | <b>TOMI Trial</b>                                                                                                                                |

### INVESTIGADORES PRINCIPALES:

Ricardo Closa Monasterolo. Jefe del Servicio de Pediatría. Hospital Universitari de Tarragona Joan 23

Joaquín Escribano Subías. Jefe del Servicio de Pediatría. Hospital Universitari Sant Joan de Reus

**INTRODUCCIÓN:** Este documento es informativo sobre el proyecto de investigación que se indica en la cabecera, al cual les invitamos a participar. Les anticipamos que su participación es voluntaria y podrán realizar todas las preguntas que deseen, así como cambiar de opinión sobre su participación en cualquier momento. Su decisión no afectará la calidad de la atención sanitaria que reciba su hijo/a.

**OBJETIVO:** Este proyecto tiene como objetivo evaluar el efecto de dos fórmulas lácteas de crecimiento (con las mismas calorías, pero con diferente proporción de proteína y grasa) durante el segundo año de vida sobre el crecimiento desde el año hasta los 6 años.

**INTERVENCIÓN NUTRICIONAL:** Los niños/as de las familias que deseen participar recibirán de forma gratuita una de las dos leches de crecimiento del estudio durante todo el segundo año de vida (50% de probabilidad para cada una). Estas dos leches tendrán el mismo contenido energético (48 Kcal/100 ml) (calorías similares a la leche de vaca semidesnatada) y se diferenciarán en las proporciones de proteínas y grasas. Una de las leches tendrá 2.95g de proteínas y 1.1g de grasas (en 100ml), mientras que la otra tendrá 0.72g de proteínas y 2.11g de grasas (en 100ml). Estas proporciones se encuentran comprendidas entre las proporciones contenidas en la leche materna y la leche de vaca de consumo habitual. En ningún momento del estudio, ni los investigadores ni las familias conocerán cuál de estas leches consume cada participante.

**METODOLOGÍA:** En este estudio participaran unos 1618 niños de Múnich (Alemania) y Reus/Tarragona. La participación en el estudio tiene una duración de 5 años. Los participantes recibirán una de las dos leches de crecimiento desde el año hasta los 2 años de vida y se evaluará su crecimiento, desarrollo y estado nutricional y de salud a las siguientes edades: 1 año, 1.5 años, 2, 4 y 6 años (en total 5 visitas a lo largo de 5 años). La recogida de datos se llevará a cabo mediante las siguientes evaluaciones y procedimientos en diferentes momentos del seguimiento (que se detallan en la Tabla 1):

- Cuestionarios de salud completados por los padres (o persona a cargo del niño/a)
- Entrevistas telefónicas breves con el equipo de investigación (para revisar la alimentación)
- Exámenes (siempre voluntarios) realizados al niño/a, como:
  - Valoración del crecimiento y la composición corporal a través de medidas antropométricas.
  - Valoración de la composición corporal a través de desplazamiento de aire (se realiza sentado durante pocos minutos en una cámara cerrada llamada "BodPod").
  - Tensión arterial (a los 4 y 6 años).
  - Actividad física a los 2, 4 y 6 años: la evaluación de la actividad física se realizará mediante cuestionarios específicos, completados por los padres (o persona a cargo del niño/a) y medida a

1  
2 través de un monitor de actividad física o acelerómetro (Actigraph). El Actigraph es un monitor de  
3 actividad física (tipo acelerómetro) que consiste en un pequeño equipamiento médico (peso  
4 aproximado: 20gr) que se lleva en la cintura o cadera con un cinturón. Este equipamiento mide la  
5 actividad física, el sueño y el gasto energético. El procedimiento consiste en llevar el dispositivo  
6 unos 5-7 días para medir la actividad diurna (no hace falta llevarlo por la noche). Después, el  
7 dispositivo se retorna al personal del estudio para que extraigan de él los datos.

- 8
- 9
- 10 ○ Análisis de sangre: la extracción de sangre será realizada por personal cualificado a los 1, 2 y 6 años.
- 11 ○ Análisis de orina: los padres o cuidadores recogerán varias muestras de orina al participante a lo
- 12 largo del estudio; esta recogida se efectuará mediante una bolsita para lactantes o mediante un
- 13 tubo convencional de recogida de orina (material que les proporcionará de forma gratuita el equipo
- 14 investigador) y se entregará en el momento de la visita.
- 15

16 **CIRCUNSTANCIAS EN LAS CUALES LA PARTICIPACIÓN DEL SUJETO SE CONSIDERA FINALIZADA:** En caso que  
17 el participante lo comunique o deje de acudir a las visitas. Mientras el participante no comunique su  
18 decisión de dejar de participar, el equipo de investigación seguirá invitándolo a asistir a las visitas.  
19 Asimismo, los participantes que no deseen continuar participando en el estudio o que no puedan seguir  
20 consumiendo el producto de estudio, serán invitados a acudir a una última visita a los 2 o 6 años.

21 **EFFECTOS ADVERSOS:** Basados en investigaciones previas, no se espera ningún efecto indeseable por el  
22 consumo de la leche de estudio. En cualquier caso, dispondrán de teléfonos de contacto para notificar  
23 cualquier incidencia o realizarnos cualquier pregunta. Así mismo, si su hijo/a ha de ser ingresado/a en algún  
24 momento por cualquier motivo, rogamos nos lo hagan saber.

25 **RIESGOS:** El estudio no supone **ningún riesgo** que no sea el derivado de una extracción sanguínea. Las  
26 extracciones de sangre son analíticas normales, que realizará una enfermera con gran experiencia, y  
27 pueden causar las molestias propias de un pinchazo. La valoración del volumen corporal a través del  
28 desplazamiento de aire es una técnica totalmente segura que no provoca ninguna molestia. El uso del  
29 monitor para medir la actividad física no conlleva ningún riesgo. El dispositivo cumple con todos los  
30 requisitos de la Unión Europea por lo que respecta a dispositivos médicos de Clase I. En todo momento se  
31 tomarán precauciones para evitar al máximo cualquier inconveniente.

32 De todas formas, pueden seguir participando en el estudio, aunque decidan no realizar alguno de los  
33 exámenes anteriormente descritos.

34 **BENEFICIOS:** Aunque este proyecto no les promete ninguna ventaja directa, ustedes contribuirán a un  
35 mejor conocimiento de la importancia de la alimentación infantil sobre la obesidad infantil y el riesgo de  
36 padecer enfermedades cardiovasculares y posiblemente su participación servirá de ayuda a otras personas  
37 con estos problemas en el futuro.

## 48 DERECHOS DE LOS PARTICIPANTES

49 **USO DE LAS MUESTRAS BIOLÓGICAS:** Servirán para llevar a cabo determinaciones bioquímicas,  
50 metabólicas, epigenéticas y genéticas relacionadas con el objetivo del estudio (la obesidad y las  
51 enfermedades cardiovasculares). En primer lugar, se analizarán parámetros del estado nutricional general,  
52 los resultados de los cuales serán comunicados a las familias.

53 Una parte de las muestras de sangre y las muestras de orina serán enviadas anonimizadas a los laboratorios  
54 centrales del proyecto en Múnich (Labor für Stoffwechsel & Ernährung, Hauner Childrens Hospital y  
55 Laboratoriumsmedizin, KUM). Otras muestras codificadas pueden ser enviadas a Nestec, en Suiza, o a sus  
56 filiales o a terceros para hacer otros análisis. Usted puede decidir restringir el uso de estas muestras para  
57  
58  
59  
60

1  
2 que no se lleven a cabo análisis genéticos (genes relacionados con la obesidad) indicándolo en la hoja de  
3 consentimiento.

4 Debido a la constante evolución del conocimiento y de las técnicas de investigación en esta área de la  
5 salud, es posible que en el futuro pueda realizarse una investigación complementaria relacionada con el  
6 objetivo del estudio. Por ello, los posibles sobrantes de las muestras de sangre y orina se preservarán en las  
7 mismas condiciones de anonimato y confidencialidad, y en un plazo máximo de 10 años serán destruidas.  
8 Ustedes pueden restringir la preservación de estas muestras indicándolo en la hoja de consentimiento. El  
9 tratamiento y uso de las muestras se realizará siguiendo lo especificado en la Ley de Investigación  
10 Biomédica (14/2007), y en el RD 1716/2011.

11  
12  
13  
14 **PROCEDIMIENTOS NO PLANIFICADOS:** Debido a la constante evolución del conocimiento científico y las  
15 técnicas, el promotor y sus colaboradores pueden desarrollar análisis no planificados relacionados con los  
16 objetivos de este ensayo y/o relacionados con investigaciones futuras en el campo de la salud y/o nutrición.  
17 Si ustedes consintieran, las muestras biológicas sobrantes (sangre y orina) o los datos, serán almacenados  
18 bajo las mismas condiciones de anonimato y confidencialidad para poder ser reutilizadas en análisis  
19 complementarios y/o futuras investigaciones científicas (siempre relacionadas con la asociación entre la  
20 alimentación infantil, el crecimiento y la salud). Si ustedes reusan, las muestras de su hijo/a serán  
21 almacenadas por un periodo máximo de 2 años y serán destruidas una vez el estudio y sus análisis estén  
22 terminados. Tienen el derecho de limitar el tiempo de retención y uso de estas muestras indicándolo en  
23 este consentimiento informado. Si aceptan el uso posterior de los datos y/o las muestras no planificadas en  
24 el protocolo inicialmente, serán informados y se les pedirá que den su consentimiento para estos análisis  
25 adicionales.

26  
27  
28  
29  
30  
31 **DEFINICIÓN DE DATOS PERSONALES:** Datos personales son toda información que se relacione con una  
32 persona identificada o identificable. Una persona identificada o identificable es una persona natural que se  
33 puede identificar, directa o indirectamente, en particular a través de un identificador como por ejemplo un  
34 nombre o un código.

35  
36  
37 **CONFIDENCIALIDAD:** Para este estudio, las muestras biológicas obtenidas, así como toda la información  
38 recogida se codificarán con un número de forma que no aparezca ni su nombre ni su número de historia  
39 clínica. Únicamente los miembros del equipo de investigación tendrán acceso a sus datos y únicamente  
40 ellos podrían ponerse en contacto con ustedes y relacionar sus datos personales con los datos de salud  
41 recogidos. Para garantizar la calidad y seguridad del estudio, podrán supervisar la recogida de datos de  
42 salud: el monitor de calidad, las autoridades sanitarias, un representante autorizado de Nestlé y el Comité  
43 Ético de Investigación Clínica.

44  
45 Se garantiza que todos los datos y resultados obtenidos serán **absolutamente confidenciales** y que se  
46 utilizarán los mecanismos necesarios para el cumplimiento de la "Ley orgánica 15/1999, del 13 de  
47 Diciembre" para la protección de datos personales, y la "Ley 14/2007 de Investigación Biomédica ". El  
48 equipo de investigación de la *Unitat de Pediatria de la Facultat de Medicina de la Universitat Rovira i Virgili*  
49 será responsable de sus datos y muestras. El equipo de investigación garantiza su confidencialidad y el  
50 hecho que las muestras y los resultados sean utilizados únicamente para las finalidades consentidas. El  
51 responsable de sus datos personales codificados (estos datos no contienen ningún nombre o dirección suya  
52 o de su familia) es Nestec Ltd., con domicilio en Avenue Nestlé 55, CH-1800, Vevey, en Suiza. Los  
53 participantes tienen derecho a acceder, cambiar y oponerse al uso de sus datos, en cualquier momento,  
54 simplemente contactando con un investigador (derechos otorgados por Ley 15/1999). Tengan en cuenta  
55 que tienen además los derechos de ver y acceder a sus datos, de borrarlos, limitar su procesamiento o la  
56 transferencia, presentar una objeción al tratamiento en las circunstancias y los términos especificados en la  
57 normativa anterior (derecho concedido por la Ley 15/1999 y 18/2018 Coll., sobre protección de datos de  
58  
59  
60

1  
2 carácter personal y Reglamento UE 2016/679 del Parlamento Europeo y del Consejo de 27 de abril de  
3 2016). No obstante, el promotor se reserva el derecho de no borrar los datos recogidos antes de retirar su  
4 consentimiento y que ya se hayan analizado como parte del estudio. Tienen el derecho de solicitar  
5 información sobre los datos del estudio recogidos por los doctores del mismo o por el promotor y sus  
6 afiliados (o representantes). Si desean ejercer estos derechos, o presentar una reclamación o solicitar la  
7 corrección de cualquier inexactitud de estos datos, pónganse en contacto con el médico del estudio o con  
8 el agente de protección de datos del Centro (*Unitat de Recerca en Pediatria i Desenvolupament Humà*. Sant  
9 Llorenç 21. 43201 Reus. Telf.977 759364 o 977 759365).

10  
11  
12  
13 Si decidiesen retirar su consentimiento, solo deberán comunicarlo a los investigadores, en tal caso, no se  
14 incorporarán más datos a la base de datos y, si lo desean, también pueden solicitar por escrito la  
15 destrucción de sus muestras biológicas. Toda la información recogida en las visitas y exploraciones  
16 complementarias se codifica como el resto de muestras y datos del estudio TOMI con un número de forma  
17 que aparezca ni su nombre ni su número de historia clínica.

18  
19  
20  
21 **TRANSFERENCIA DE DATOS:** Los datos del estudio recogidos de su hijo/a serán enviados al promotor, a  
22 terceros que trabajen para el promotor y a las autoridades reguladoras si así lo reclamaran. Solamente  
23 datos codificados se almacenarán mediante un sistema informático seguro que pertenece a Medidata,  
24 empresa ubicada en todo el mundo, un tercero de Nestlé. El acceso al sistema web está restringido al  
25 personal del estudio y a los representantes del promotor. El promotor también podrá utilizar los datos del  
26 estudio para poder comercializar la fórmula del ensayo en algunos países o para publicarlos. No obstante,  
27 nada que pueda revelar su identidad ni la de su hijo/a saldrá fuera del centro.

28  
29  
30 Sus datos codificados y los de su hijo/a serán transferidos y procesados a países distintos de España, en  
31 condiciones que garanticen su confidencialidad, desde el centro a Nestlé Suiza y otros  
32 países/organizaciones internacionales que actúen en nombre del promotor. Como responsable de los  
33 datos, Nestlé ha tomado medidas contractuales, organizativas y de seguridad que aseguren el  
34 mantenimiento del nivel de protección adecuado exigido por las leyes europeas y españolas, sea cual sea la  
35 tercera parte del estudio o los países a los que se transfieran los datos. Durante estos procedimientos no se  
36 divulgará su identidad ni la de su hijo/a.

37  
38  
39 **VOLUNTARIEDAD:** Su participación en este estudio es totalmente **voluntaria**; pueden decidir no participar,  
40 o cambiar su decisión y denegar su consentimiento en cualquier momento, hecho que no afectará ni  
41 perjudicará la relación con su médico ni su atención. Para ello, únicamente deberán comunicarlo al equipo  
42 de investigación.

43  
44  
45 **INFORMACIÓN SOBRE EL ESTUDIO:** Si se dispusiera de nueva información sobre el producto en estudio que  
46 pueda influir en su decisión de continuar en el mismo, se les informará de manera oportuna. En el caso de  
47 que estas investigaciones proporcionen datos que pudieran ser clínica o genéticamente relevantes para  
48 ustedes e interesar a su salud o a la de su familia, les serán comunicados salvo que indiquen expresamente  
49 que no desean recibir esta información. Aunque no deseen recibir esta información, tengan en cuenta que  
50 la ley establece que, cuando la información obtenida sea necesaria para evitar un grave perjuicio para la  
51 salud de sus familiares biológicos, un comité de expertos estudiará el caso y decidirá si es conveniente  
52 informar a los afectados o a sus representantes legales. Si por alguna razón ustedes quisieran conocer los  
53 resultados de las investigaciones que se hayan producido como consecuencia de su colaboración, podrán  
54 ponerse en contacto con los responsables del proyecto, que les informarán debidamente.

55  
56  
57 **COMPENSACIÓN:** Ustedes no recibirán incentivos económicos para participar en el estudio, pero recibirán  
58 una compensación que minimice el coste de tiempo y desplazamiento por acudir a la visita.

**FONDO DE FINANCIACIÓN:** Este estudio recibe soporte económico de Nestec Ltd., Avenue Nestlé 55 CH-1800 Vevey, Switzerland. Esta compañía es tomadora de un **seguro de responsabilidad** (contratado con la compañía Zurich Insurance plc., con nº de póliza Z140955 para el Hospital Universitari de Tarragona Joan XXIII y Z140963 para el Hospital Universitari Sant Joan de Reus) por cualquier posible consecuencia negativa sobre los participantes del estudio por su participación en el estudio. El promotor tiene la potestad de terminar el estudio en cualquier momento.

**OTROS ASPECTOS REGULATORIOS:** Este estudio ha sido aprobado por los Comités Éticos de Investigación Clínica del Institut d'Investigació Sanitària Pere Virgili y el de la Fundació Jordi Gol i Gorina. El estudio ha sido diseñado de acuerdo a la Declaración de Helsinki, que establece los criterios de investigación biomédica en personas de forma ética.

Por favor, vean a continuación un esquema (Figura) en que se detallan todas las pruebas previstas en cada momento del seguimiento y ¡hagan todas las preguntas y comentarios que deseen!

Figura. Valoraciones que se realizan a los participantes durante el estudio

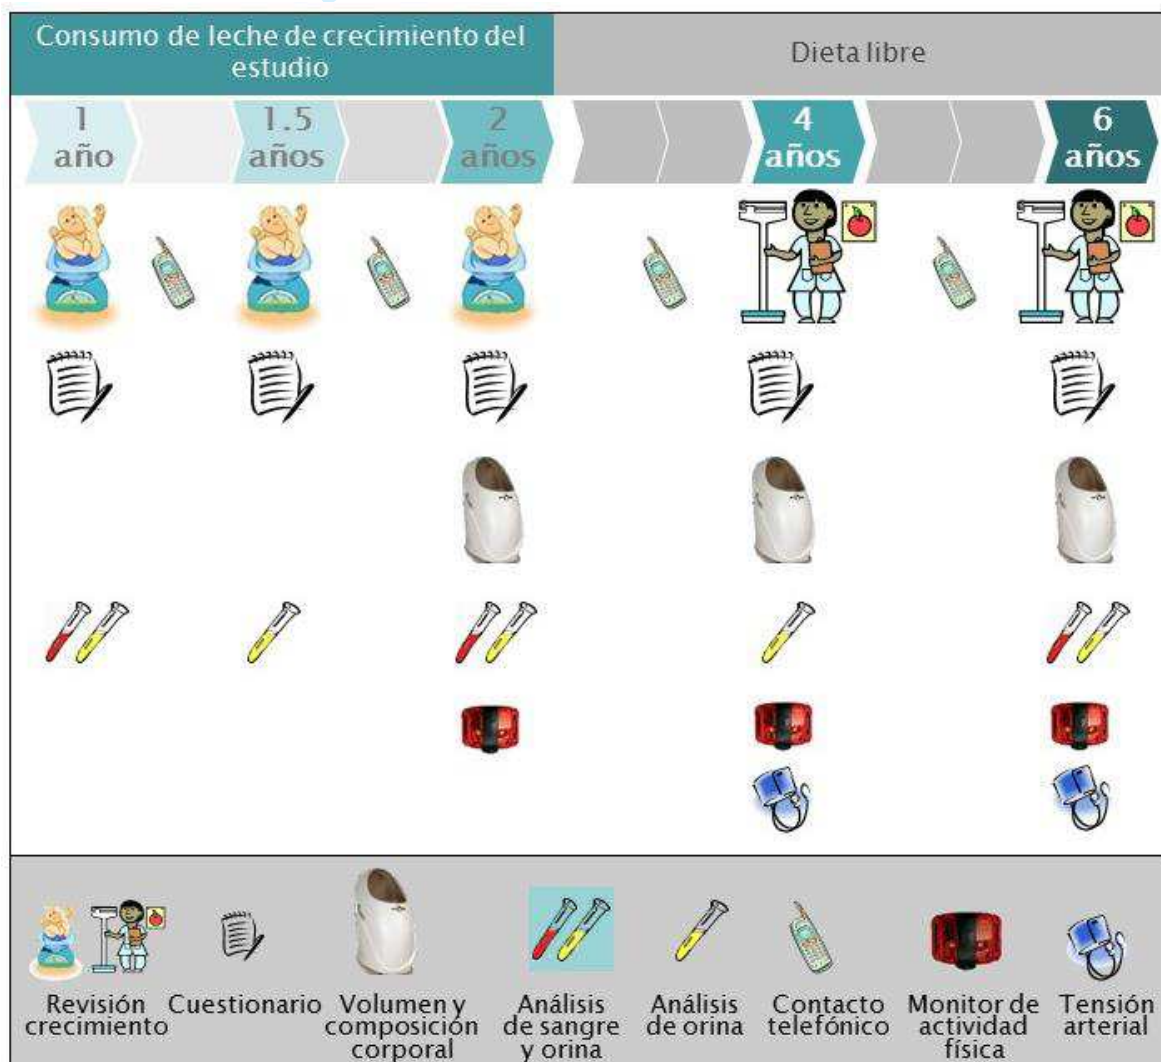

### INFORMACIÓN DE CONTACTO

Unitat de Pediatria, Facultat de Medicina. Universitat Rovira i Virgili. C/ Sant Llorenç 21, 43201 Reus.

Teléfonos: 977759365 / 977759364/ 619733840 (Tarragona)/ 616891314 (Reus)

(Copia para el participante)

**CONSENTIMIENTO INFORMADO**

Sr./Sra. .... informa al padre/madre  
Sr./Sra. .... en relación al estudio  
TOMI.

He sido informado/a sobre los derechos de mi hijo/a y los posibles riesgos y beneficios de su participación en el proyecto:

- La participación de mi hijo/a en este estudio es voluntaria.
- Se garantiza que los derechos y atención sanitaria de mi hijo/a no se verán influenciados por mi decisión.
- Los resultados relevantes que se obtengan a través de este proyecto podrán ser publicados, pero mis datos personales nunca serán revelados a no ser que lo requiera la ley.
- En el caso de que tenga cualquier duda o problema relacionado con el estudio, puedo contactar con Dr. Ricardo Closa, Dr. Joaquín Escribano, Dra. Natalia Ferré y Dra. Verónica Luque a través de los teléfonos 977759364, 977759365, 619733840 (Tarragona), 616891314 (Reus).
- Me ha sido entregada la hoja de información a los participantes y he sido informado/a de la naturaleza del estudio, que se resume en dicha hoja.
- He podido hacer preguntas para aclarar mis dudas.
- Puedo hacer cualquier pregunta en cualquier momento sobre este proyecto.
- He sido informado/a sobre mis derechos como participante en la investigación y, voluntariamente consiento en ceder mi material biológico y genético (muestras de sangre y orina) bajo las condiciones descritas y únicamente para los objetivos definidos.

Respondiendo a las preguntas de abajo declaro que:

- Deseo ser informado de los resultados clínicamente relevantes. Si  No
- Accedo a los análisis genéticos y epigenéticos opcionales que se realizaran dentro del marco de este estudio. Si  No
- Acepto que las muestras y datos sean utilizados y almacenados más tiempo que para los objetivos concretos del estudio y puedan ser utilizadas en futuros estudios científicos dentro del campo de la salud o la nutrición. Si  No
- Si la respuesta a la pregunta 3 es "No": Accedo a que se me contacte en un futuro en el caso de que estime oportuno añadir nuevos datos a los recogidos inicialmente o muestras biológicas adicionales. Si  No

| Firma del padre/ tutor                                                                                                                                                                                                                                                                                                                                                                                                                                                                                                                                                                          | Firma de la madre/ tutor | Firma del informador                                                                                                                                                                                                                                                                                                                                                                                                        |
|-------------------------------------------------------------------------------------------------------------------------------------------------------------------------------------------------------------------------------------------------------------------------------------------------------------------------------------------------------------------------------------------------------------------------------------------------------------------------------------------------------------------------------------------------------------------------------------------------|--------------------------|-----------------------------------------------------------------------------------------------------------------------------------------------------------------------------------------------------------------------------------------------------------------------------------------------------------------------------------------------------------------------------------------------------------------------------|
| Fecha __/__/____<br>Su firma indica que usted ha leído y entiende la información antedicha, que usted ha discutido este estudio con la persona que obtiene este consentimiento, que usted ha decidido participar basado en la información proporcionada, y que se le ha dado a usted una copia de este formulario.<br>En caso que únicamente uno de los dos progenitores o cuidadores legales esté presente en esta entrevista, su firma implica que el otro progenitor está de acuerdo. De todas formas se le facilitará una hoja de firma para que esta sea entregada en la siguiente visita. | Fecha __/__/____         | Fecha __/__/____<br>Declaro que los requisitos para el consentimiento informado para este proyecto han sido satisfechos, que he proporcionado al participante una copia de este formulario, discutido con él/ella el proyecto y le he explicado en términos no técnicos la información contenida en este documento. Igualmente, certifico que animé al participante a que hiciera preguntas y que todas fueron contestadas. |



(Copia para el investigador)

**CONSENTIMIENTO INFORMADO**

ID: \_\_\_\_\_

Sr./Sra. .... informa al padre/madre  
 Sr./Sra. .... en relación al estudio  
 TOMI.

He sido informado/a sobre los derechos de mi hijo/a y los posibles riesgos y beneficios de su participación en el proyecto:

- La participación de mi hijo/a en este estudio es voluntaria.
- Se garantiza que los derechos y atención sanitaria de mi hijo/a no se verán influenciados por mi decisión.
- Los resultados relevantes que se obtengan a través de este proyecto podrán ser publicados pero mis datos personales nunca serán revelados a no ser que lo requiera la ley.
- En el caso de que tenga cualquier duda o problema relacionado con el estudio, puedo contactar con Dr. Ricardo Closa, Dr. Joaquín Escribano, Dra. Natalia Ferré y Dra. Verónica Luque a través de los teléfonos 977759364, 977759365, 619733840 (Tarragona), 616891314 (Reus).
- Me ha sido entregada la hoja de información a los participantes y he sido informado/a de la naturaleza del estudio, que se resume en dicha hoja.
- He podido hacer preguntas para aclarar mis dudas.
- Puedo hacer cualquier pregunta en cualquier momento sobre este proyecto.
- He sido informado sobre mis derechos como participante en la investigación y, voluntariamente consiento en ceder mi material biológico y genético (muestras de sangre y orina) bajo las condiciones descritas y únicamente para los objetivos definidos.

Respondiendo a las preguntas de abajo declaro que:

- Deseo ser informado de los resultados clínicamente relevantes. Si  No
- Accedo a los análisis genéticos y epigenéticos opcionales que se realizaran dentro del marco de este estudio. Si  No
- Acepto que las muestras y datos sean utilizados y almacenados más tiempo que para los objetivos concretos del estudio y puedan ser utilizadas en futuros estudios científicos dentro del campo de la salud o la nutrición. Si  No
- Si la respuesta a la pregunta 3 es “No”: Accedo a que se me contacte en un futuro en el caso de que estime oportuno añadir nuevos datos a los recogidos inicialmente o muestras biológicas adicionales. Si  No

| Firma del padre/ tutor                                                                                                                                                                                                                                                                                                                                                                                                                                                                                                                                                      | Firma de la madre/ tutor | Firma del informador                                                                                                                                                                                                                                                                                                                                                                                    |
|-----------------------------------------------------------------------------------------------------------------------------------------------------------------------------------------------------------------------------------------------------------------------------------------------------------------------------------------------------------------------------------------------------------------------------------------------------------------------------------------------------------------------------------------------------------------------------|--------------------------|---------------------------------------------------------------------------------------------------------------------------------------------------------------------------------------------------------------------------------------------------------------------------------------------------------------------------------------------------------------------------------------------------------|
| Fecha __/__/____                                                                                                                                                                                                                                                                                                                                                                                                                                                                                                                                                            | Fecha __/__/____         | Fecha __/__/____                                                                                                                                                                                                                                                                                                                                                                                        |
| Su firma indica que usted ha leído y entiende la información antedicha, que usted ha discutido este estudio con la persona que obtiene este consentimiento, que usted ha decidido participar basado en la información proporcionada, y que se le ha dado a usted una copia de este formulario.<br>En caso que únicamente uno de los dos progenitores o cuidadores legales esté presente en esta entrevista, su firma implica que el otro progenitor está de acuerdo. De todas formas se le facilitará una hoja de firma para que esta sea entregada en la siguiente visita. |                          | Declaro que los requisitos para el consentimiento informado para este proyecto han sido satisfechos, que he proporcionado al participante una copia de este formulario, discutido con él/ella el proyecto y le he explicado en términos no técnicos la información contenida en este documento. Igualmente, certifico que animé al participante a que hiciera preguntas y que todas fueron contestadas. |

(Copia para el investigador, en caso que se obtenga posteriormente el consentimiento de uno de los dos progenitores)

**CONSENTIMIENTO INFORMADO** ID: \_\_\_\_\_

Sr./Sra. .... informa al padre/madre  
Sr./Sra. .... en relación al estudio  
TOMI.

He sido informado/a sobre los derechos de mi hijo/a y los posibles riesgos y beneficios de su participación en el proyecto:

- La participación de mi hijo/a en este estudio es voluntaria.
- Se garantiza que los derechos y atención sanitaria de mi hijo/a no se verán influenciados por mi decisión.
- Los resultados relevantes que se obtengan a través de este proyecto podrán ser publicados pero mis datos personales nunca serán revelados a no ser que lo requiera la ley.
- En el caso de que tenga cualquier duda o problema relacionado con el estudio, puedo contactar con Dr. Ricardo Closa, Dr. Joaquín Escribano, Dra. Natalia Ferré y Dra. Verónica Luque a través de los teléfonos 977759364, 977759365, 619733840 (Tarragona), 616891314 (Reus).
- Me ha sido entregada la hoja de información a los participantes y he sido informado/a de la naturaleza del estudio, que se resume en dicha hoja.
- He podido hacer preguntas para aclarar mis dudas.
- Puedo hacer cualquier pregunta en cualquier momento sobre este proyecto.
- He sido informado sobre mis derechos como participante en la investigación y, voluntariamente consiento en ceder mi material biológico y genético (muestras de sangre y orina) bajo las condiciones descritas y únicamente para los objetivos definidos.

Respondiendo a las preguntas de abajo declaro que:

- Deseo ser informado de los resultados clínicamente relevantes. Si  No
- Accedo a los análisis genéticos y epigenéticos opcionales que se realizaran dentro del marco de este estudio. Si  No
- Acepto que las muestras y datos sean utilizados y almacenados más tiempo que para los objetivos concretos del estudio y puedan ser utilizadas en futuros estudios científicos dentro del campo de la salud o la nutrición. Si  No
- Si la respuesta a la pregunta 3 es "No": Accedo a que se me contacte en un futuro en el caso de que estime oportuno añadir nuevos datos a los recogidos inicialmente o muestras biológicas adicionales. Si  No

**Firma del padre/madre/tutor**

**Firma del informador**

Fecha \_\_/\_\_/\_\_\_\_

Fecha \_\_/\_\_/\_\_\_\_

Su firma indica que usted ha leído y entiende la información antedicha, que usted ha discutido este estudio con la persona que obtiene este consentimiento, que usted ha decidido participar basado en la información proporcionada, y que se le ha dado a usted una copia de este formulario.

Declaro que los requisitos para el consentimiento informado para este proyecto han sido satisfechos, que he proporcionado al participante una copia de este formulario, discutido con él/ella el proyecto y le he explicado en términos no técnicos la información contenida en este documento. Igualmente, certifico que animé al participante a que hiciera preguntas y que todas fueron contestadas.



## Elterninformation und Einverständniserklärung

### ***Einfluss von Milcheiweiß auf das Wachstum und die spätere Entwicklung von Übergewicht (ToMI-Studie)***

**Studienregistrierung: NCT 02907502 bei [clinicaltrials.gov](http://clinicaltrials.gov)**

*Bitte lesen Sie diese Information und Einverständniserklärung sorgfältig durch. Das Studienpersonal wird Ihnen jederzeit alle Fragen beantworten.*

*Die ToMI-Studie wurde durch die Ethikkommission und den Datenschutzbeauftragten des Klinikum der Universität München geprüft und zustimmend bewertet.*

*Sie erhalten eine Kopie dieses Schreibens für Ihre Unterlagen.*

1  
2  
3 Liebe Familie,  
4

5 wir am Dr. von Haunerschen Kinderspital in München führen eine Studie zum Einfluss  
6 von Milcheiweiß auf Gewicht und Wachstum von Kindern durch. Die Studie heißt  
7 ToMI-Studie (ToMI von engl. *toddler's milk intervention* = Kleinkindermilch  
8 Intervention).  
9

### 10 11 Warum führen wir die Studie durch

12 Die zunehmende Häufigkeit von Übergewicht und Fettleibigkeit (Adipositas) stellt ein  
13 großes medizinisches Problem dar. Inzwischen sind alle Altersgruppen davon  
14 betroffen, insbesondere auch Klein- und Schulkinder. Wir befassen uns sehr intensiv  
15 mit den frühkindlichen Ursachen für diese Entwicklung. Unter anderem leiten wir das  
16 weltweit größte Forschungsprojekt zu Auswirkungen der frühkindlichen Ernährung  
17 auf die Gesundheit im späteren Leben (<http://www.project-earlynutrition.eu>). Vor  
18 einigen Jahren konnten wir in einer anderen EU-finanzierten Studie („CHOP-Studie“)  
19 mit Säuglingen zeigen, dass ein niedrigerer Eiweißgehalt in der Säuglingsnahrung  
20 während des ersten Lebensjahres dazu beiträgt, dass die Kinder im Schulalter seltener  
21 übergewichtig sind.  
22

23 Bei der ToMI-Studie soll nun untersucht werden, ob sich die gleiche Wirkung durch  
24 weniger Milcheiweiß auch im zweiten Lebensjahr zeigt. Dafür wurde speziell eine  
25 Kleinkindermilch mit reduziertem Eiweißgehalt hergestellt, die im Vergleich zu  
26 herkömmlicher Kleinkindermilch und Kuhmilch deutlich weniger Milcheiweiß enthält.  
27

28 Neben der Ernährung ist auch das Maß an körperlicher Aktivität in der Kindheit  
29 ausschlaggebend für die gesunde Entwicklung eines Kindes. Wir wollen dabei vor  
30 allem den Zusammenhang zwischen der frühen Ernährung und dem kindlichen  
31 Aktivitätsverhalten untersuchen, aber auch mehr über mögliche Einflussgrößen für das  
32 Aktivitätsniveau Ihres Kindes herausfinden.  
33

### 34 Studienzweck

35 Ziel der ToMI-Studie ist es, das Wachstum, die Entwicklung und den Stoffwechsel von  
36 Kleinkindern zu untersuchen, die im zweiten Lebensjahr eine eiweißreduzierte  
37 Kleinkindermilch erhalten.  
38

### 39 Ablauf der Studie (siehe auch Bild 1)

40 Falls Sie der Teilnahme zustimmen, wird Ihr Kind zufällig entweder der  
41 herkömmlichen oder einer eiweißreduzierten Kleinkindermilch zugeteilt. Um die  
42 Studienergebnisse nicht beeinflussen zu können, werden weder Sie noch wir erfahren,  
43 welche Kindermilch Ihr Kind bekommt. Die Studienmilch soll im 2. Lebensjahr alle  
44 anderen Milchgetränke und -nahrungen, somit auch Kuhmilch, ersetzen. Sie erhalten  
45 die Studienmilch von uns kostenfrei für das gesamte zweite Lebensjahr. Mit dem  
46 zweiten Geburtstag Ihres Kindes endet die Phase, in der Ihr Kind die Studiennahrung  
47 bekommt. Insgesamt werden 1618 Kleinkinder an der ToMI-Studie teilnehmen (davon  
48 809 in München und 809 in Reus und Tarragona in Spanien) und vom 1. bis zum 6.  
49 (72. Monat) Geburtstag beobachtet.  
50

51 Im Alter von 12, 18, 24, 48 und 72 Monaten werden wir Ihr Kind im Dr. von  
52 Haunerschen Kinderspital sehen. Bei jedem Besuch werden wir Ihr Kind untersuchen  
53 und Größe, Gewicht und weitere Körpermaße aufnehmen. Wir werden Ihnen jeweils  
54  
55  
56  
57  
58  
59  
60

Fragen zur Gesundheit und Verhalten Ihres Kindes stellen. Um zu erfahren, wie und wo Ihr Kind aufwächst, werden wir Sie anfangs auch zu Ihrer Herkunft, Ausbildung und Familienstruktur sowie zu Ernährungsgewohnheiten im ersten Lebensjahr befragen. Um zu verstehen wie sich Ihr Kind sonst ernährt, werden wir Sie zu jedem Zeitpunkt fragen, was und wieviel Ihr Kind in den vergangenen 24 Stunden gegessen und getrunken hat. Den Urin Ihres Kindes würden wir gerne jedes Mal untersuchen.

Im Alter von 24 und 48 Monat bitten wir Sie einen Fragebogen zur allgemeinen Entwicklung Ihres Kindes auszufüllen. Ab dem 2. Lebensjahr bestimmen wir die Körperzusammensetzung mittels BodPod®. Die BodPod®-Messung ist eine kurze, unkomplizierte Untersuchung mittels Luftverdrängung zur Bestimmung des Körperfettanteils (<http://www.bodpod.com/de/produkte/koerperzusammensetzung>).

Im Zuge der Studienbesuche mit 2, 4 und 6 Jahren wollen wir die körperliche Aktivität Ihres Kindes messen. Zusätzlich möchten wir mit Hilfe eines Fragebogens Daten über die körperliche Aktivität von Ihnen und Ihrem Kind sammeln. Die Aktivität wird mit einem Akzelerometer (wGTx3-BT, ActiGraph, Pensacola, USA) gemessen. Der Sensor wird mit Hilfe eines Gummibandes an der Hüfte Ihres Kindes befestigt. Aus den gewonnenen Daten können wir Rückschlüsse auf die tägliche Dauer und Intensität des Bewegungsverhaltens Ihres Kindes ziehen.

Eine Blutabnahme (ca. 6 ml) ist am Anfang und mit 2 und 6 Jahren vorgesehen. Wenn es gewünscht wird, können wir zuvor etwas Emla® Crème auf die Haut Ihres Kindes auftragen, um die Einstichstelle örtlich zu betäuben.

Wir werden Sie zusätzlich alle 2-6 Monate kontaktieren, Sie anfangs zum Verzehr der Studiennahrung befragen und uns kurz nach dem Wohlbefinden Ihres Kindes erkundigen.

Weitere Informationen zur Studie finden Sie auch auf unserer Homepage unter <http://www.klinikum.uni-muenchen.de/de/forschung/TOMI-Studie.html>.

Eine Beschreibung der Studie steht auch unter <http://www.clinicaltrials.gov> zur Verfügung.

Die Studiennahrung wurde von der Firma Nestec (Avenue Nestlé 55, CH - 1800 Vevey, Schweiz) für die Studie entwickelt und produziert. Die Nahrung entspricht den europäischen Richtlinien und industriellen Standards. Sie enthält 48 kcal / 100ml Energie und 0,7 g / 100ml bzw. 3,0 g / 100ml Eiweiß in der Eiweiß-reduzierten bzw. der herkömmlichen Kindermilch. Sie ist geeignet für die Ernährung von Kleinkindern im Alter von 12 bis 24 Lebensmonaten und darf nur in diesem Zeitraum durch das Studienkind konsumiert werden.

### Familienkost, Beikost und Getränke

Natürlich darf Ihr Kind auch während der Studie seine gewohnte Kleinkinderkost bzw. Familienkost zu sich nehmen. Wir bitten Sie nur, die Milchmahlzeiten Ihres Kindes durch Studiennahrung zu ersetzen. Auch die Herstellung von Breimahlzeiten, Puddings oder ähnlicher milchhaltiger Speisen soll möglichst mit der Studienmilch erfolgen. Nach dem 2. Geburtstag sind Sie völlig frei bei der Ernährung Ihres Kindes.

### Nutzen und Risiken bei der Teilnahme an der Studie

1  
2  
3 Durch die Teilnahme an dieser Studie bekommt Ihr Kind die Möglichkeit, eine  
4 neuartige Kleinkindermilch zu verzehren. Die Kleinkindermilch wird nach  
5 europäischen Richtlinien und industriellem Standard hergestellt. Die neuartige  
6 Kleinkindermilch enthält ausreichend Eiweiß und ist im Eiweißgehalt vergleichbar mit  
7 Muttermilch. Trotzdem kann es zu Unverträglichkeiten bei Ihrem Kind kommen. Wir  
8 erwarten jedoch keine Reaktionen, die über das normale Maß bei Verwendung von  
9 Kleinkindermilch hinausgehen.  
10

11  
12 Eine Teilnahme an der Aktivitätsmessung kann wichtige Hinweise auf das  
13 Aktivitätsverhalten Ihres Kindes liefern. Sie erhalten nach der Abgabe des  
14 Akzelerometers eine individuelle Einschätzung, welche Ihnen hilft, das  
15 Aktivitätsniveau Ihres Kindes besser zu verstehen und ggf. gezielt zu fördern.  
16

17 Auch wenn das Gerät sehr robust ist und in der alltäglichen Nutzung nicht beschädigt  
18 werden kann, ist jedoch bei grober Gewalt die Ablösung von Kleinteilen möglich, die  
19 verschluckt werden können.  
20

21 Das Risiko bei der Blutentnahme ist verschwindend gering. Es ist möglich, dass es zur  
22 Bildung eines blauen Flecks und in den seltensten Fällen zu Infektionen an der  
23 Einstichstelle kommt.  
24

25 Falls im Verlauf der Studie wichtige neue Erkenntnisse bekannt werden, die sich auf  
26 Ihre Entscheidung über die weitere Teilnahme an dieser Studie auswirken könnten,  
27 werden Sie darüber umgehend informiert. Sie erhalten ggfs. eine neue  
28 Elterninformation und Einverständniserklärung zum Unterzeichnen, sofern Sie weiter  
29 an der Studie teilnehmen möchten.  
30  
31

32 Sie können aus der Studie ausgeschlossen werden, wenn es medizinische oder  
33 organisatorische Gründe notwendig machen. In diesem Falle werden wir Sie darüber  
34 informieren und die bis dahin erhobenen Daten anonymisiert verwenden.  
35  
36

### 37 Laboruntersuchungen

38 Blutwerte liefern wichtige Informationen, um die Auswirkungen der Ernährung auf  
39 den Stoffwechsel des Körpers beurteilen zu können. Entscheidend sind für uns aber  
40 nicht die einzelnen Werte Ihres Kindes – wie bei Krankheiten oder der Bewertungen  
41 durch Ihren Kinderarzt -, sondern der Mittelwert von allen ToMI-Kindern. Das  
42 bedeutet: Es sollten möglichst alle Kinder mitmachen, damit wir tatsächlich neue  
43 Erkenntnisse aus dem Blut Ihres Kindes gewinnen können! Daher hoffen wir sehr, dass  
44 Sie einer Blutentnahme bei Ihrem Kind zustimmen. In den Blut und Urinproben führen  
45 wir neben Routineuntersuchungen zur Gesundheit (z.B. Blutbild) vor allem Messungen  
46 von Stoffen durch, die mit der Eiweiß- und Energieverwertung (z.B. Harnstoff,  
47 Glukose, Blutfette) zusammenhängen. Daneben werden Hormone, die mit Wachstum  
48 und Gewichtsentwicklung im Zusammenhang stehen, bestimmt. Wir werden Sie über  
49 das Blutbild sowie die Untersuchung von Blutfetten informieren. Alle anderen  
50 Blutwerte werden erst am Ende der Studie bestimmt und dienen ausschließlich  
51 wissenschaftlichen Zwecken.  
52  
53

54 Um die Proben zu verschlüsseln, werden sie statt mit dem Namen Ihres Kindes mit  
55 einem „Pseudonym“ versehen. Das Pseudonym ist eine Kombination aus Buchstaben  
56 und Zahlen. Nur mit Hilfe von Computerprogrammen (Pseudonymisierungsschlüssel),  
57 die Kind und Pseudonym einander zuordnen, kann herausgefunden werden, welche  
58  
59  
60

Probe zu welchem Kind gehört. Der Pseudonymisierungsschlüssel wird nicht an Dritte weitergegeben.

Da in der Forschung ständig neue Erkenntnisse gewonnen werden, bitten wir Sie um die Erlaubnis, eventuell überschüssige Blutproben anonymisiert (eine Zuordnung zu Ihrem Kind ist nicht mehr möglich) bis zu 10 Jahre nach Studienende aufbewahren zu dürfen, damit Blut nicht vergeudet und noch für künftige, innovative Analysen zur Verfügung steht.

### Genetische Untersuchungen

Eine Frage die uns beschäftigt ist, wie Veränderungen am Anfang des Lebens (in dieser Studie eine Veränderung der Ernährung im 2. Lebensjahr) den Stoffwechsel und die Gesundheit später beeinflussen können. Eine Möglichkeit, warum es zu einer langfristigen, eventuell lebenslangen Prägung kommen könnte, sind Veränderungen in der Steuerung der Genaktivierung. Während man vor kurzem noch glaubte, dass man Erbfaktoren, also Gene, einfach hat oder nicht hat, weiß man heute viel mehr, wie Gene „an- und ausgeschaltet“ werden können („Epigenetik“). Durch eine Untersuchung der Erbsubstanz im Blut können wir feststellen, welche für den Stoffwechsel, die Körperzusammensetzung, Übergewicht und damit einhergehende Erkrankungen relevante Gene an- oder ausgeschaltet wurden.

Wenn Sie der Untersuchung zustimmen, wird aus einer Blutprobe Ihres Kindes die Erbsubstanz (DNA) gewonnen und untersucht. Die Blutproben werden im Alter von 12, 24 und 72 Monaten gesammelt, um Veränderungen in der Steuerung der Gene feststellen zu können. Die eigentlichen genetischen Untersuchungen erfolgen erst zu einem späteren Zeitpunkt, wenn von möglichst allen Probanden die DNA zu den drei genannten Zeitpunkten gewonnen wurde.

Für die Genuntersuchung muss keine zusätzliche Blutprobe abgenommen werden. Es wird das „Abfallprodukt“ der übrigen Blutproben verwendet, die abgetrennten Blutzellen, die ansonsten für keine Untersuchung genutzt werden können. Aus diesen Zellen wird die Erbsubstanz (DNA) gewonnen und die meisten der bisher bekannten, informationsenthaltenden Abschnitte des Erbguts untersucht. Anhand dieser Informationen können wir feststellen, welche Gene an- und ausgeschaltet wurden, die für Stoffwechsel, Körperzusammensetzung und Übergewicht sowie die assoziierte Erkrankungen relevant sind. Außerdem können wir diese Veränderungen in Zusammenhang mit den vielen Einflüssen betrachten, die wir im Rahmen der Studie bei Ihrem Kind beobachten.

Aus der Untersuchung von Erbfaktoren und deren Aktivität ergibt sich für Ihr Kind kein direkter Vorteil. Mit Ihrer Teilnahme unterstützen Sie jedoch die Forschung, wie frühkindliche Ernährung und Verhaltensweisen sowie Umweltfaktoren andauernde Veränderungen verursachen. Dadurch kann möglicherweise die Grundlage für Verbesserungen in der Diagnose und Behandlung von Erkrankungen gelegt werden.

Die Untersuchungen auf Erbfaktoren werden pseudonymisiert bzw. in irreversibel anonymisierter Form am Helmholtz-Zentrum München, Institut für Molekulare Epidemiologie durchgeführt. Durch eine doppelte Kodierung (den pseudonymisierten Proben wird vor der Aufarbeitung eine fortlaufende Labor-Nummer zugeordnet) ist es den Mitarbeitern des Helmholtz-Zentrums nicht möglich, Rückschlüsse auf die persönlichen Daten des Probanden zu ziehen. Damit ist sichergestellt, dass diese

1  
2  
3 besonders sensiblen genetischen Daten zusätzlich geschützt werden. Die genetischen  
4 Untersuchungen werden nur für Forschungszwecke im Rahmen der ToMI-Studie  
5 durchgeführt. Es ist nicht möglich und nicht vorgesehen Ergebnisse mitzuteilen. Die  
6 statistische Auswertung der genetischen Daten wird unter Verantwortung von Prof. B.  
7 Koletzko durchgeführt, ohne Bezug zum Namen Ihres Kindes.  
8  
9  
10  
11  
12  
13  
14  
15  
16  
17  
18  
19  
20  
21  
22  
23  
24  
25  
26  
27  
28  
29  
30  
31  
32  
33  
34  
35  
36  
37  
38  
39  
40  
41  
42  
43  
44  
45  
46  
47  
48  
49  
50  
51  
52  
53  
54  
55  
56  
57  
58  
59  
60

For peer review only



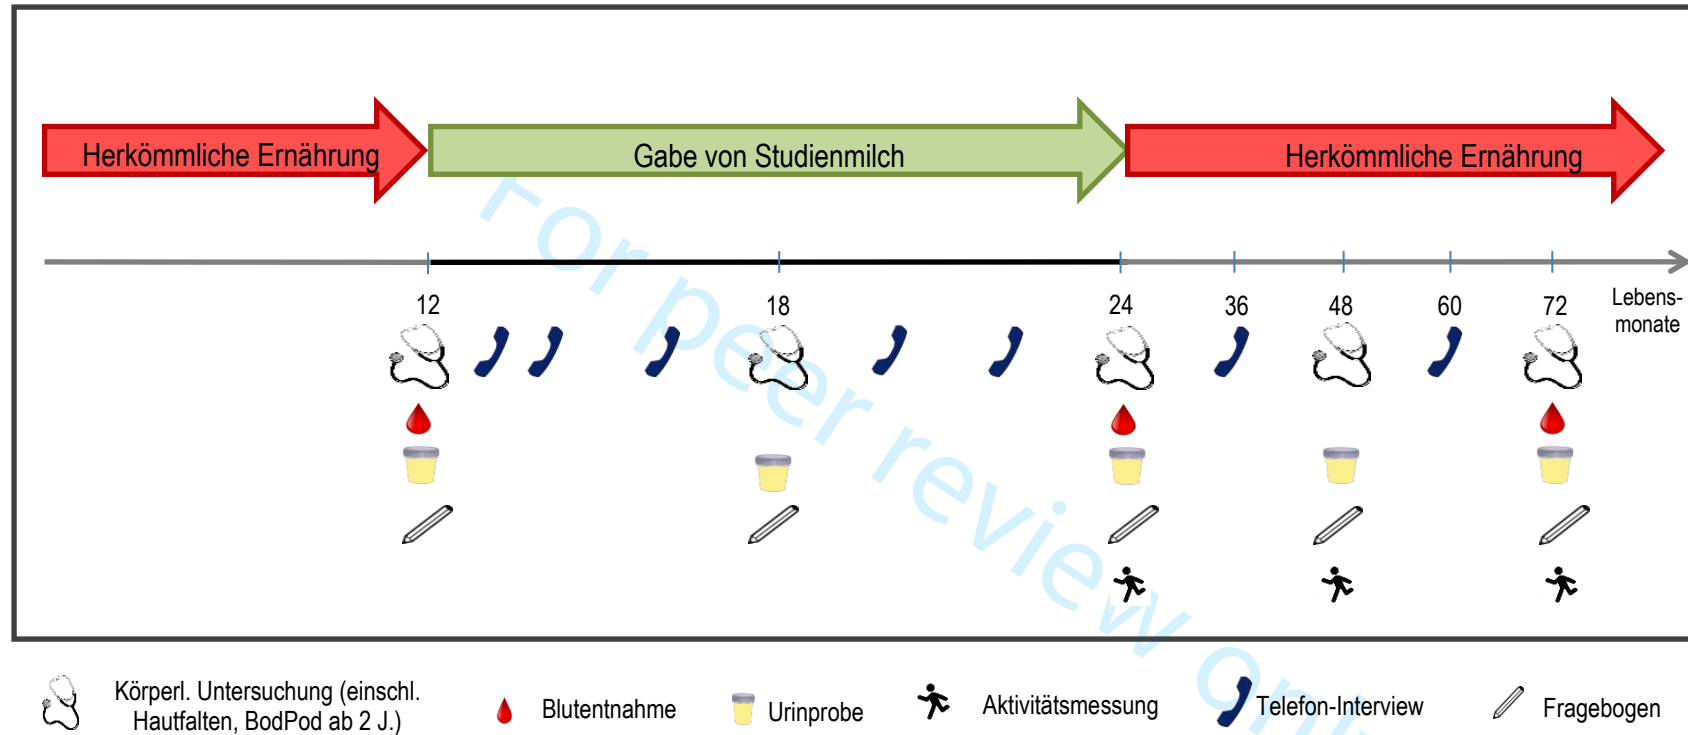

**Bild 1.** Ablauf der Studie

### Studienauswertung

Die Daten, Proben und Fragebögen werden ausschließlich für den oben genannten Studienzweck verwendet. Die Studienauswertung wird gemeinsam mit Nestec durchgeführt. Die Veröffentlichung von Ergebnissen und deren Interpretation erfolgt einvernehmlich.

### Studienfinanzierung

Die Studie wird durch die Firma Nestec Ltd. (Avenue Nestlé 55, CH - 1800 Vevey) finanziert. Die Finanzierung umfasst das nötige Studienpersonal, Laboruntersuchungen und die Studiennahrung. Weitere wissenschaftliche Untersuchungen werden durch öffentliche und gegebenenfalls private Finanzierungen erfolgen.

### Versicherungsschutz

Auch wenn keinerlei Komplikationen erwartet werden, so sind doch alle Studienteilnehmer durch eine Studienversicherung abgesichert. Der Versicherungsschutz erstreckt sich auf alle Gesundheitsschädigungen, die als Folge der im Zusammenhang mit der Studie angewendeten Maßnahmen eintreten bis zu einer Höchstsumme von € 5.000.000.

Im Schadensfall können Sie sich direkt an den Versicherer (Zurich Insurance plc NfD, Solmsstraße 27-37, 60486 Frankfurt am Main, Tel.: 069 7115-0; Policen-Nummer: 801.380.024.996) wenden und Ihre Ansprüche geltend machen. Um den Versicherungsschutz nicht zu gefährden, müssen Sie folgendes beachten:

- Teilen Sie uns alle medizinischen Behandlungen mit, denen sich Ihr Kind während der Studienphase unterzieht (Ausnahmen sind Vorsorgeuntersuchungen und Impfungen). Dies gilt auch für die Einnahme neuer Medikamente.
- Teilen Sie eine Gesundheitsschädigung, die als Folge der Studienteilnahme eingetreten sein könnte, bitte dem zuständigen Studienpersonal und der oben genannten Versicherungsgesellschaft mit.

### Freiwilligkeit / Rücktrittsklausel

Die Teilnahme an der Studie ist freiwillig. Mit Ihrer Einwilligung auf der „Einverständniserklärung“ geben Sie Ihr Einverständnis zur Teilnahme Ihres Kindes an dieser Studie. **Sie haben das Recht, zu jeder Zeit ohne Angabe von Gründen und ohne Nachteile die Teilnahme an der Studie zu beenden.**

### Aufwandsentschädigung

Für die Teilnahme an der Studie erhalten Sie eine Aufwandsentschädigung.

Wenn Sie weitere Fragen zu dieser Studie haben oder wenn Sie der Ansicht sind, eine studienbezogene Gesundheitsschädigung erlitten zu haben, stehen wir Ihnen gern zur Verfügung: Dr. V. Grote, V.Jäger, M. Meier, S. Vogt, N. Antl, und P. Becker.  
Tel:089-4400-57427; E-Mail: Tomi.Studie@med.uni-muenchen.de

## Datenschutz: Im Rahmen der Studie gelten folgende Regeln des Datenschutzes.

### **Datenschutz**

Bei dieser Studie werden die Vorschriften über die ärztliche Schweigepflicht und den Datenschutz entsprechend den europäischen, deutschen und bayerischen Richtlinien und der Deklaration von Helsinki eingehalten. Um Sie kontaktieren zu können, werden Ihre Kontaktdaten in einer Datenbank (MedSciNet, Stockholm, Schweden, <http://medscinet.com/>) gespeichert. In dieser Datenbank werden persönliche, jedoch keinerlei medizinischen Daten gespeichert. Zur Auslieferung der Studiennahrung erfolgt eine Weitergabe Ihrer Adressdaten an ein externes Logistik-Unternehmen (OCasa Lodilat Logistica S.L., Avda de la Astronomia 8, 28830 San Fernando de Henares, Spain). Eine Weiterverwendung dieser Daten zu anderen Zwecken als der Auslieferung der Studiennahrung ist dem Unternehmen untersagt. Das Unternehmen unterliegt den deutschen gesetzlichen Datenschutzbestimmungen.

Alle weiteren Daten – also „medizinische Daten“ –, die nicht der Kontaktaufnahme und Kontaktorganisation dienen, werden in getrennten Datenbanken (Medidata Solutions, 350 Hudson St, New York, NY 10014 sowie lokal im Klinikum der Universität München) gespeichert. Persönliche Daten wie Name oder Adresse werden in diesen Datenbanken nicht erfasst. Die Zuordnung zum Namen Ihres Kindes kann nur über einen Verschlüsselungscode erfolgen, der nur unter aktiver Hilfe des Studienpersonals einem Namen zugeordnet werden kann. So sind alle erhobenen Daten und Befunde Ihres Kindes pseudonymisiert.

Sie haben das Recht, jederzeit Auskunft über Ihre gespeicherten personenbezogenen Daten zu erhalten, diese zu berichtigen oder ggf. löschen zu lassen. Verantwortlich für die Datenverarbeitung ist Prof Dr. Berthold Koletzko sowie Dr. Veit Grote als dessen Stellvertreter.

### Kontaktdaten der Datenschutzbeauftragten:

Bei Beschwerden haben Sie das Recht sich an die jeweilige Datenschutz-Aufsichtsbehörde zu wenden. Der lokale Datenschutzbeauftragte für das Klinikum der Universität München ist:

Herr Gerhard Meyer  
Klinikum der Universität München  
Pettenkoferstr. 8  
80336 München  
E-Mail: [datenschutz@med.uni-muenchen.de](mailto:datenschutz@med.uni-muenchen.de)

Die übergeordnete Behörde für die LMU und das Klinikum ist:

Bayerischer Landesbeauftragter für den Datenschutz (BayLfd)  
Postanschrift: Postfach 22 12 19, 80502 München  
Hausanschrift: Wagnmüllerstr. 18, 80538 München  
Tel.: 089 212672-0  
Fax: 089 212672-50

Datenzugang:

Der Zugang zu den Adressdaten und zum Verschlüsselungscode ist auf folgende Personen der Studienorganisation beschränkt: Prof. B. Koletzko, Dr. V. Grote, V. Jäger, M. Meier, S. Vogt, N. Antl, P. Becker und U. Handel. Weitere Personen aus dem Studienzentrum (Dr. von Haunersches Kinderspital, Abt. Stoffwechsel und Ernährungsmedizin unter der Leitung von Prof. B. Koletzko) können zur Studienorganisation im Verlauf der Studie nach Zustimmung der Studienleitung Zugang erhalten. Die Firma Nestec hat darüber hinaus die Firma PAREXEL International GmbH beauftragt, die Qualität der Studie vor Ort zu überwachen (sog. „Monitoring“). Das Unternehmen wird zum Datenschutz verpflichtet und hat vor Ort Zugang zu persönlichen und medizinischen Daten. Eine Entschlüsselung einzelner Studienteilnehmer erfolgt lediglich in Fällen, in denen es die Sicherheit erfordert („medizinische Gründe“). Das Unternehmen unterliegt den deutschen, gesetzlichen Datenschutzbestimmungen.

Die Firma Nestec hat kontinuierlichen Zugang zu pseudonymisierten Daten, jedoch nie zu den Kontaktdaten. Diese pseudonymisierten Daten werden von Nestec auch in anderen Ländern als Deutschland oder der Schweiz (Sitz von Nestec) verarbeitet. Hierbei wird Ihre Identität gewahrt und die Vertraulichkeit Ihrer Daten gewährleistet. Es gelten für diese Drittländer /internationale Organisationen vertraglich die europäischen und deutschen gesetzlichen Datenschutzbestimmungen. Einige Stoffwechseluntersuchungen werden in den Laboratorien der Firma Nestec, Avenue Nestlé 55, CH - 1800 Vevey, Schweiz durchgeführt. Die genetischen und epigenetischen Analysen werden in Zusammenarbeit mit dem Helmholtz-Zentrum, Institut für Molekulare Epidemiologie, München erstellt. Alle anderen Untersuchungen werden in Laboratorien des Klinikums der Universität München durchgeführt. Die Blutproben werden hierzu nur mit dem Verschlüsselungscode weitergegeben und lassen keinen direkten Rückschluss auf den Studienteilnehmer zu. Für die genetischen und epigenetischen Analysen wird eine erneute 2. Verschlüsselung durch die Mitarbeiter des Helmholtz-Zentrums durchgeführt. Diese doppelte Kodierung stellt sicher, dass die genetischen und epigenetischen Daten zusätzlich geschützt werden. Eine Entblindung ist nur durch das Studienzentrum, nicht aber durch die Mitarbeiter des Helmholtz-Zentrums möglich.

Im Falle des Widerrufs der Einwilligung werden der Name und Ihre persönlichen Kontaktdaten aus unserer Datenbank gelöscht. Die bis dahin gespeicherten Daten Ihres Kindes werden nun anonymisiert verwendet. Außerdem werden die Kontaktdaten aller Studienteilnehmer innerhalb eines Monats nach Abschluss der Studie gelöscht. Die schriftlichen Unterlagen, inklusive dieser Einverständniserklärung, werden im Dr. von Haunerschen Kinderspital bis zum Ende der Studie und in einem dafür geeigneten Lager bis zum Ablauf der gesetzlichen Aufbewahrungsfrist (12 Jahre nach Studienende) aufbewahrt. Im Falle von Veröffentlichungen der Studienergebnisse bleibt die Vertraulichkeit der persönlichen Daten Ihres Kindes ebenfalls gewährleistet, denn die Daten werden, wenn überhaupt, in anonymisierter Form wiedergegeben.

Auf Wunsch werden wir Sie über allgemeine Studienergebnisse informieren.

Im Falle von zusätzlichen, bisher nicht geplanten Untersuchungen oder Datenerhebungen, die über den oben genannten Studienablauf hinausgehen, werden wir das zustimmende Votum der zuständigen Ethikkommission einholen.

Vor der Einwilligung in die Studie haben Sie hier die Möglichkeit gezielt Fragen zu notieren, die noch ausführlicher mit Ihnen besprochen werden sollen.

1  
2  
3  
4  
5  
6  
7  
8  
9  
10  
11  
12  
13  
14  
15  
16  
17  
18  
19  
20  
21  
22  
23  
24  
25  
26  
27  
28  
29  
30  
31  
32  
33  
34  
35  
36  
37  
38  
39  
40  
41  
42  
43  
44  
45  
46  
47  
48  
49  
50  
51  
52  
53  
54  
55  
56  
57  
58  
59  
60



## Einverständniserklärung & Datenschutzerklärung für die Teilnahme meines/unseres Kindes

### *Einfluss von Milcheiweiß auf das Wachstum und die spätere Entwicklung von Übergewicht (ToMI-Studie)*

\_\_\_\_\_  
Name, Vorname des Kindes

\_\_\_\_\_  
Geburtsdatum

Ich erkläre, dass mir die Studienbedingungen vollständig erläutert wurden und alle Fragen zu meiner Zufriedenheit geklärt wurden. Das Formblatt mit den Studieninformationen habe ich erhalten. Ich hatte ausreichend Zeit, dieses Formblatt zu lesen und Fragen zu stellen. Mögliche Risiken und Nachteile für mein Kind wurden mir erklärt. Ich weiß, dass ich jetzt und in Zukunft jede Frage bezüglich dieser Studie und der Untersuchungen stellen kann.

Ich weiß, dass ich/mein Kind jederzeit von der Teilnahme an der Studie zurücktreten kann, ohne dass ich dafür Gründe angeben muss oder dass mir oder meinem Kind Nachteile entstehen würden.

Hiermit willige ich in die Teilnahme meines Kindes in die Studie ein:

\_\_\_\_\_  
Ort, Datum

\_\_\_\_\_  
Name, Vorname  
1. Erziehungsberechtigte/r

\_\_\_\_\_  
Unterschrift  
1. Erziehungsberechtigte/r

**Ich besitze das alleinige Sorgerecht:**     Ja     Nein

\_\_\_\_\_  
Ort, Datum

\_\_\_\_\_  
Name, Vorname  
2. Erziehungsberechtigte/r

\_\_\_\_\_  
Unterschrift  
2. Erziehungsberechtigte/r

\_\_\_\_\_  
Ort, Datum

\_\_\_\_\_  
Name, Vorname  
Studienpersonal (Aufklärende/r)

\_\_\_\_\_  
Unterschrift  
Studienpersonal (Aufklärende/r)

Die Datenschutz-Information im Rahmen der Teilnehmerinformation habe ich zur Kenntnis genommen. Ich willige hiermit in die Erhebung und Verwendung der persönlichen Daten meines Kindes nach diesen Maßgaben ein.

\_\_\_\_\_  
Ort, Datum

\_\_\_\_\_  
Name, Vorname  
1. Erziehungsberechtigte/r

\_\_\_\_\_  
Unterschrift  
1. Erziehungsberechtigte/r

\_\_\_\_\_  
Ort, Datum

\_\_\_\_\_  
Name, Vorname  
2. Erziehungsberechtigte/r

\_\_\_\_\_  
Unterschrift  
2. Erziehungsberechtigte/r

\_\_\_\_\_  
Ort, Datum

\_\_\_\_\_  
Name, Vorname  
Studienpersonal (Aufklärende/r)

\_\_\_\_\_  
Unterschrift  
Studienpersonal (Aufklärende/r)

**Einverständnis- & Datenschutzerklärung für die genomweite Genotypisierung und epigenetische Untersuchungen meines/unseres Kindes im Rahmen der ToMI-Studie**

***Einfluss von Milcheiweiß auf das Wachstum und die spätere Entwicklung von Übergewicht (ToMI-Studie)***

\_\_\_\_\_  
Name, Vorname des Kindes

\_\_\_\_\_  
Geburtsdatum

Hiermit willige ich insbesondere ein, dass aus dem Blut meines Kindes **Erbmaterial gewonnen, aufbewahrt und untersucht** werden darf. Die genomweite Genotypisierung, sowie die epigenetischen Untersuchungen dienen der Aufdeckung genetischer Ursachen von Erkrankungen und Ursachen für Übergewicht und Stoffwechseleränderungen im Rahmen der ToMI-Studie. Die Teilnahme an der Untersuchung birgt keine weiteren gesundheitlichen Risiken über die erfolgende Blutentnahme hinaus.

Die Daten und Untersuchungsergebnisse werden ausschließlich für das Untersuchungsziel dieser Studie verwendet. Auf die verschlüsselten Daten können nur autorisierte Mitarbeiter der Studie zugreifen. Eine Weitergabe von Daten an unberechtigte Dritte erfolgt nicht. Die im Rahmen dieser Studie gewonnenen genetischen Daten werden bis zu 10 Jahren nach Abschluss der wissenschaftlichen Untersuchung oder bis auf Widerruf aufbewahrt.

Ich weiß, dass ich jetzt und in Zukunft weitere Fragen bezüglich dieser Studie und den einzelnen Untersuchungen stellen kann. Ich weiß, dass ich jederzeit von der freiwilligen Teilnahme an der Studie zurücktreten kann, ohne dass ich hierfür Gründe angeben muss.

Ich willige freiwillig in die Erhebung, Verarbeitung und Nutzung personenbezogener Daten nach Maßgabe des Aufklärungsbogens der Studie ein. Für die Erhebung, Verarbeitung und Nutzung ist der Leiter des Forschungsvorhabens, Herr Prof. Berthold Koletzko, verantwortlich.

\_\_\_\_\_  
Ort, Datum

\_\_\_\_\_  
Name, Vorname  
1. Erziehungsberechtigte/r

\_\_\_\_\_  
Unterschrift  
1. Erziehungsberechtigte/r

\_\_\_\_\_  
Ort, Datum

\_\_\_\_\_  
Name, Vorname  
2. Erziehungsberechtigte/r

\_\_\_\_\_  
Unterschrift  
2. Erziehungsberechtigte/r

\_\_\_\_\_  
Ort, Datum

\_\_\_\_\_  
Name, Vorname  
Studienpersonal (Aufklärende/r)

\_\_\_\_\_  
Unterschrift  
Studienpersonal (Aufklärende/r)

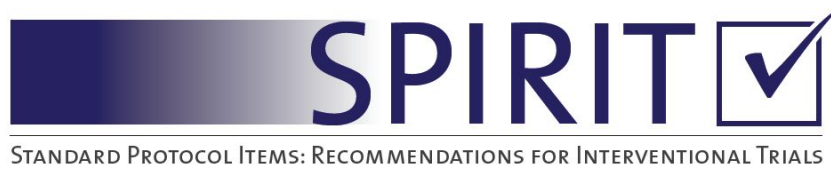

SPIRIT 2013 Checklist: Recommended items to address in a clinical trial protocol and related documents\*

| Section/item                      | Item No | Description                                                                                                                                                                                                                                                                              | Check/page |
|-----------------------------------|---------|------------------------------------------------------------------------------------------------------------------------------------------------------------------------------------------------------------------------------------------------------------------------------------------|------------|
| <b>Administrative information</b> |         |                                                                                                                                                                                                                                                                                          |            |
| Title                             | 1       | Descriptive title identifying the study design, population, interventions, and, if applicable, trial acronym                                                                                                                                                                             | Y          |
| Trial registration                | 2a      | Trial identifier and registry name. If not yet registered, name of intended registry                                                                                                                                                                                                     | 2          |
|                                   | 2b      | All items from the World Health Organization Trial Registration Data Set                                                                                                                                                                                                                 |            |
| Protocol version                  | 3       | Date and version identifier                                                                                                                                                                                                                                                              | 11         |
| Funding                           | 4       | Sources and types of financial, material, and other support                                                                                                                                                                                                                              | 13         |
| Roles and responsibilities        | 5a      | Names, affiliations, and roles of protocol contributors                                                                                                                                                                                                                                  | 1, 13      |
|                                   | 5b      | Name and contact information for the trial sponsor                                                                                                                                                                                                                                       | 13         |
|                                   | 5c      | Role of study sponsor and funders, if any, in study design; collection, management, analysis, and interpretation of data; writing of the report; and the decision to submit the report for publication, including whether they will have ultimate authority over any of these activities | 13         |
|                                   | 5d      | Composition, roles, and responsibilities of the coordinating centre, steering committee, endpoint adjudication committee, data management team, and other individuals or groups overseeing the trial, if applicable (see Item 21a for data monitoring committee)                         | 13         |
| <b>Introduction</b>               |         |                                                                                                                                                                                                                                                                                          |            |
| Background and rationale          | 6a      | Description of research question and justification for undertaking the trial, including summary of relevant studies (published and unpublished) examining benefits and harms for each intervention                                                                                       | 3          |
|                                   | 6b      | Explanation for choice of comparators                                                                                                                                                                                                                                                    |            |
| Objectives                        | 7       | Specific objectives or hypotheses                                                                                                                                                                                                                                                        | 4          |
| Trial design                      | 8       | Description of trial design including type of trial (eg, parallel group, crossover, factorial, single group), allocation ratio, and framework (eg, superiority, equivalence, noninferiority, exploratory)                                                                                | 4          |



## Methods: Participants, interventions, and outcomes

|                      |     |                                                                                                                                                                                                                                                                                                                                                                                |                 |
|----------------------|-----|--------------------------------------------------------------------------------------------------------------------------------------------------------------------------------------------------------------------------------------------------------------------------------------------------------------------------------------------------------------------------------|-----------------|
| Study setting        | 9   | Description of study settings (eg, community clinic, academic hospital) and list of countries where data will be collected. Reference to where list of study sites can be obtained                                                                                                                                                                                             | 4               |
| Eligibility criteria | 10  | Inclusion and exclusion criteria for participants. If applicable, eligibility criteria for study centres and individuals who will perform the interventions (eg, surgeons, psychotherapists)                                                                                                                                                                                   | 4, Table 1      |
| Interventions        | 11a | Interventions for each group with sufficient detail to allow replication, including how and when they will be administered                                                                                                                                                                                                                                                     | 4, Table 1      |
|                      | 11b | Criteria for discontinuing or modifying allocated interventions for a given trial participant (eg, drug dose change in response to harms, participant request, or improving/worsening disease)                                                                                                                                                                                 | 5               |
|                      | 11c | Strategies to improve adherence to intervention protocols, and any procedures for monitoring adherence (eg, drug tablet return, laboratory tests)                                                                                                                                                                                                                              | 10              |
|                      | 11d | Relevant concomitant care and interventions that are permitted or prohibited during the trial                                                                                                                                                                                                                                                                                  | Table 1         |
| Outcomes             | 12  | Primary, secondary, and other outcomes, including the specific measurement variable (eg, systolic blood pressure), analysis metric (eg, change from baseline, final value, time to event), method of aggregation (eg, median, proportion), and time point for each outcome. Explanation of the clinical relevance of chosen efficacy and harm outcomes is strongly recommended | 5,6             |
| Participant timeline | 13  | Time schedule of enrolment, interventions (including any run-ins and washouts), assessments, and visits for participants. A schematic diagram is highly recommended (see Figure)                                                                                                                                                                                               | 7, 12, Figure 1 |
| Sample size          | 14  | Estimated number of participants needed to achieve study objectives and how it was determined, including clinical and statistical assumptions supporting any sample size calculations                                                                                                                                                                                          | 6               |
| Recruitment          | 15  | Strategies for achieving adequate participant enrolment to reach target sample size                                                                                                                                                                                                                                                                                            | 7               |

## Methods: Assignment of interventions (for controlled trials)

### Allocation:

|                     |     |                                                                                                                                                                                                                                                                                                                                                          |   |
|---------------------|-----|----------------------------------------------------------------------------------------------------------------------------------------------------------------------------------------------------------------------------------------------------------------------------------------------------------------------------------------------------------|---|
| Sequence generation | 16a | Method of generating the allocation sequence (eg, computer-generated random numbers), and list of any factors for stratification. To reduce predictability of a random sequence, details of any planned restriction (eg, blocking) should be provided in a separate document that is unavailable to those who enrol participants or assign interventions | 7 |
|---------------------|-----|----------------------------------------------------------------------------------------------------------------------------------------------------------------------------------------------------------------------------------------------------------------------------------------------------------------------------------------------------------|---|

|    |                                                           |     |                                                                          |        |
|----|-----------------------------------------------------------|-----|--------------------------------------------------------------------------|--------|
| 1  |                                                           |     |                                                                          |        |
| 2  | Allocation                                                | 16b | Mechanism of implementing the allocation sequence (eg, central           | 7      |
| 3  | concealment                                               |     | telephone; sequentially numbered, opaque, sealed envelopes),             |        |
| 4  | mechanism                                                 |     | describing any steps to conceal the sequence until interventions are     |        |
| 5  |                                                           |     | assigned                                                                 |        |
| 6  |                                                           |     |                                                                          |        |
| 7  | Implementation                                            | 16c | Who will generate the allocation sequence, who will enrol participants,  | 7      |
| 8  |                                                           |     | and who will assign participants to interventions                        |        |
| 9  |                                                           |     |                                                                          |        |
| 10 | Blinding                                                  | 17a | Who will be blinded after assignment to interventions (eg, trial         | 7      |
| 11 | (masking)                                                 |     | participants, care providers, outcome assessors, data analysts), and     |        |
| 12 |                                                           |     | how                                                                      |        |
| 13 |                                                           |     |                                                                          |        |
| 14 |                                                           |     |                                                                          |        |
| 15 |                                                           | 17b | If blinded, circumstances under which unblinding is permissible, and     | 7      |
| 16 |                                                           |     | procedure for revealing a participant's allocated intervention during    |        |
| 17 |                                                           |     | the trial                                                                |        |
| 18 |                                                           |     |                                                                          |        |
| 19 |                                                           |     |                                                                          |        |
| 20 | <b>Methods: Data collection, management, and analysis</b> |     |                                                                          |        |
| 21 | Data collection                                           | 18a | Plans for assessment and collection of outcome, baseline, and other      | 7,8    |
| 22 | methods                                                   |     | trial data, including any related processes to promote data quality (eg, |        |
| 23 |                                                           |     | duplicate measurements, training of assessors) and a description of      |        |
| 24 |                                                           |     | study instruments (eg, questionnaires, laboratory tests) along with      |        |
| 25 |                                                           |     | their reliability and validity, if known. Reference to where data        |        |
| 26 |                                                           |     | collection forms can be found, if not in the protocol                    |        |
| 27 |                                                           |     |                                                                          |        |
| 28 |                                                           |     |                                                                          |        |
| 29 |                                                           | 18b | Plans to promote participant retention and complete follow-up,           | 5      |
| 30 |                                                           |     | including list of any outcome data to be collected for participants who  |        |
| 31 |                                                           |     | discontinue or deviate from intervention protocols                       |        |
| 32 |                                                           |     |                                                                          |        |
| 33 |                                                           |     |                                                                          |        |
| 34 | Data                                                      | 19  | Plans for data entry, coding, security, and storage, including any       | 8,9,11 |
| 35 | management                                                |     | related processes to promote data quality (eg, double data entry;        |        |
| 36 |                                                           |     | range checks for data values). Reference to where details of data        |        |
| 37 |                                                           |     | management procedures can be found, if not in the protocol               |        |
| 38 |                                                           |     |                                                                          |        |
| 39 |                                                           |     |                                                                          |        |
| 40 | Statistical                                               | 20a | Statistical methods for analysing primary and secondary outcomes.        | 9      |
| 41 | methods                                                   |     | Reference to where other details of the statistical analysis plan can be |        |
| 42 |                                                           |     | found, if not in the protocol                                            |        |
| 43 |                                                           |     |                                                                          |        |
| 44 |                                                           | 20b | Methods for any additional analyses (eg, subgroup and adjusted           | 10     |
| 45 |                                                           |     | analyses)                                                                |        |
| 46 |                                                           |     |                                                                          |        |
| 47 |                                                           | 20c | Definition of analysis population relating to protocol non-adherence     | 9      |
| 48 |                                                           |     | (eg, as randomised analysis), and any statistical methods to handle      |        |
| 49 |                                                           |     | missing data (eg, multiple imputation)                                   |        |
| 50 |                                                           |     |                                                                          |        |
| 51 |                                                           |     |                                                                          |        |
| 52 | <b>Methods: Monitoring</b>                                |     |                                                                          |        |
| 53 |                                                           |     |                                                                          |        |
| 54 | Data monitoring                                           | 21a | Composition of data monitoring committee (DMC); summary of its role      | 10     |
| 55 |                                                           |     | and reporting structure; statement of whether it is independent from     |        |
| 56 |                                                           |     | the sponsor and competing interests; and reference to where further      |        |
| 57 |                                                           |     | details about its charter can be found, if not in the protocol.          |        |
| 58 |                                                           |     | Alternatively, an explanation of why a DMC is not needed                 |        |
| 59 |                                                           |     |                                                                          |        |
| 60 |                                                           |     |                                                                          |        |

|    |                                 |     |                                                                                                                                                                                                                                                                                     |      |
|----|---------------------------------|-----|-------------------------------------------------------------------------------------------------------------------------------------------------------------------------------------------------------------------------------------------------------------------------------------|------|
| 1  |                                 |     |                                                                                                                                                                                                                                                                                     |      |
| 2  |                                 | 21b | Description of any interim analyses and stopping guidelines, including who will have access to these interim results and make the final decision to terminate the trial                                                                                                             | 10   |
| 3  |                                 |     |                                                                                                                                                                                                                                                                                     |      |
| 4  |                                 |     |                                                                                                                                                                                                                                                                                     |      |
| 5  |                                 |     |                                                                                                                                                                                                                                                                                     |      |
| 6  | Harms                           | 22  | Plans for collecting, assessing, reporting, and managing solicited and spontaneously reported adverse events and other unintended effects of trial interventions or trial conduct                                                                                                   | 10   |
| 7  |                                 |     |                                                                                                                                                                                                                                                                                     |      |
| 8  |                                 |     |                                                                                                                                                                                                                                                                                     |      |
| 9  |                                 |     |                                                                                                                                                                                                                                                                                     |      |
| 10 |                                 |     |                                                                                                                                                                                                                                                                                     |      |
| 11 | Auditing                        | 23  | Frequency and procedures for auditing trial conduct, if any, and whether the process will be independent from investigators and the sponsor                                                                                                                                         | 10   |
| 12 |                                 |     |                                                                                                                                                                                                                                                                                     |      |
| 13 |                                 |     |                                                                                                                                                                                                                                                                                     |      |
| 14 |                                 |     |                                                                                                                                                                                                                                                                                     |      |
| 15 |                                 |     |                                                                                                                                                                                                                                                                                     |      |
| 16 | <b>Ethics and dissemination</b> |     |                                                                                                                                                                                                                                                                                     |      |
| 17 |                                 |     |                                                                                                                                                                                                                                                                                     |      |
| 18 | Research ethics approval        | 24  | Plans for seeking research ethics committee/institutional review board (REC/IRB) approval                                                                                                                                                                                           | 12   |
| 19 |                                 |     |                                                                                                                                                                                                                                                                                     |      |
| 20 |                                 |     |                                                                                                                                                                                                                                                                                     |      |
| 21 | Protocol amendments             | 25  | Plans for communicating important protocol modifications (eg, changes to eligibility criteria, outcomes, analyses) to relevant parties (eg, investigators, REC/IRBs, trial participants, trial registries, journals, regulators)                                                    | 11   |
| 22 |                                 |     |                                                                                                                                                                                                                                                                                     |      |
| 23 |                                 |     |                                                                                                                                                                                                                                                                                     |      |
| 24 |                                 |     |                                                                                                                                                                                                                                                                                     |      |
| 25 |                                 |     |                                                                                                                                                                                                                                                                                     |      |
| 26 | Consent or assent               | 26a | Who will obtain informed consent or assent from potential trial participants or authorised surrogates, and how (see Item 32)                                                                                                                                                        | 12   |
| 27 |                                 |     |                                                                                                                                                                                                                                                                                     |      |
| 28 |                                 |     |                                                                                                                                                                                                                                                                                     |      |
| 29 |                                 |     |                                                                                                                                                                                                                                                                                     |      |
| 30 |                                 | 26b | Additional consent provisions for collection and use of participant data and biological specimens in ancillary studies, if applicable                                                                                                                                               | 12   |
| 31 |                                 |     |                                                                                                                                                                                                                                                                                     |      |
| 32 |                                 |     |                                                                                                                                                                                                                                                                                     |      |
| 33 | Confidentiality                 | 27  | How personal information about potential and enrolled participants will be collected, shared, and maintained in order to protect confidentiality before, during, and after the trial                                                                                                | 8,12 |
| 34 |                                 |     |                                                                                                                                                                                                                                                                                     |      |
| 35 |                                 |     |                                                                                                                                                                                                                                                                                     |      |
| 36 |                                 |     |                                                                                                                                                                                                                                                                                     |      |
| 37 | Declaration of interests        | 28  | Financial and other competing interests for principal investigators for the overall trial and each study site                                                                                                                                                                       | 13   |
| 38 |                                 |     |                                                                                                                                                                                                                                                                                     |      |
| 39 |                                 |     |                                                                                                                                                                                                                                                                                     |      |
| 40 |                                 |     |                                                                                                                                                                                                                                                                                     |      |
| 41 | Access to data                  | 29  | Statement of who will have access to the final trial dataset, and disclosure of contractual agreements that limit such access for investigators                                                                                                                                     | 12   |
| 42 |                                 |     |                                                                                                                                                                                                                                                                                     |      |
| 43 |                                 |     |                                                                                                                                                                                                                                                                                     |      |
| 44 |                                 |     |                                                                                                                                                                                                                                                                                     |      |
| 45 | Ancillary and post-trial care   | 30  | Provisions, if any, for ancillary and post-trial care, and for compensation to those who suffer harm from trial participation                                                                                                                                                       | 11   |
| 46 |                                 |     |                                                                                                                                                                                                                                                                                     |      |
| 47 |                                 |     |                                                                                                                                                                                                                                                                                     |      |
| 48 | Dissemination policy            | 31a | Plans for investigators and sponsor to communicate trial results to participants, healthcare professionals, the public, and other relevant groups (eg, via publication, reporting in results databases, or other data sharing arrangements), including any publication restrictions | 12   |
| 49 |                                 |     |                                                                                                                                                                                                                                                                                     |      |
| 50 |                                 |     |                                                                                                                                                                                                                                                                                     |      |
| 51 |                                 |     |                                                                                                                                                                                                                                                                                     |      |
| 52 |                                 |     |                                                                                                                                                                                                                                                                                     |      |
| 53 |                                 |     |                                                                                                                                                                                                                                                                                     |      |
| 54 |                                 | 31b | Authorship eligibility guidelines and any intended use of professional writers                                                                                                                                                                                                      | 12   |
| 55 |                                 |     |                                                                                                                                                                                                                                                                                     |      |
| 56 |                                 |     |                                                                                                                                                                                                                                                                                     |      |
| 57 |                                 | 31c | Plans, if any, for granting public access to the full protocol, participant-level dataset, and statistical code                                                                                                                                                                     | 12   |
| 58 |                                 |     |                                                                                                                                                                                                                                                                                     |      |
| 59 |                                 |     |                                                                                                                                                                                                                                                                                     |      |
| 60 |                                 |     |                                                                                                                                                                                                                                                                                     |      |

## Appendices

|                            |    |                                                                                                                                                                                                |            |
|----------------------------|----|------------------------------------------------------------------------------------------------------------------------------------------------------------------------------------------------|------------|
| Informed consent materials | 32 | Model consent form and other related documentation given to participants and authorised surrogates                                                                                             | Supplement |
| Biological specimens       | 33 | Plans for collection, laboratory evaluation, and storage of biological specimens for genetic or molecular analysis in the current trial and for future use in ancillary studies, if applicable | 6          |

\*It is strongly recommended that this checklist be read in conjunction with the SPIRIT 2013 Explanation & Elaboration for important clarification on the items. Amendments to the protocol should be tracked and dated. The SPIRIT checklist is copyrighted by the SPIRIT Group under the Creative Commons "[Attribution-NonCommercial-NoDerivs 3.0 Unported](#)" license.

For peer review only
